# Supplementary material for: The evolutionary history of plant T2/S-type ribonucleases
Source: PubMed Central journal article supplement (PMC5598434; doi:10.7717/peerj.3790), 2017-09-11
Supplement: peerj-05-3790-s001.pdf [file peerj-05-3790-s001.pdf]

## Contents

|                                                 |          |
|-------------------------------------------------|----------|
| <b>S1 Protein database ENTREZ query</b>         | <b>2</b> |
| <b>S2 Nucleotide blast search ENTREZ query</b>  | <b>2</b> |
| <b>S3 Species Filtered from GenBank Results</b> | <b>2</b> |

## List of Figures

|     |                                                                                               |    |
|-----|-----------------------------------------------------------------------------------------------|----|
| S1  | Phylogenetic relationships between T2/S-RNases in land plants. . . . .                        | 3  |
| S1a | Class II . . . . .                                                                            | 3  |
| S1b | Class III, Section A . . . . .                                                                | 9  |
| S1c | Class III, Section B . . . . .                                                                | 9  |
| S1d | Class I, Section A . . . . .                                                                  | 9  |
| S1e | Class I, Section B . . . . .                                                                  | 9  |
| S1f | Class I, Section C . . . . .                                                                  | 9  |
| S2  | The relationship between pI values and pH optima for several T2/S-type RNases in land plants. | 9  |
| S3  | Gene tree of F-box-containing genes near T2/S-type RNases. . . . .                            | 10 |

## List of Tables

|    |                                                                      |    |
|----|----------------------------------------------------------------------|----|
| S1 | Accessions and Genomic Sequences Used in this Study . . . . .        | 11 |
| S2 | Genomes Examined . . . . .                                           | 63 |
| S3 | Studies of Expression Patterns and Function of T2/S-RNases . . . . . | 67 |

## S1 Protein database ENTREZ query

(RNase OR Ribonuclease) AND T2 AND 150:400[Sequence Length] AND  
txid33090[Organism] AND srcdb\_refseq[PROP]

## S2 Nucleotide blast search ENTREZ query

300:10000[Sequence Length] AND txid33090[Organism]

## S3 Species Filtered from GenBank Results

*Antirrhinum majus* × *Antirrhinum hispanicum*  
*Aquilegia formosa* × *Aquilegia pubescens*  
*Chrysanthemum* × *morifolium*  
*Citrus* × *paradisi*  
*Coffea arabica*  
*Gerbera hybrid*  
*Juglans hindsii* × *Juglans regia*  
*Leymus cinereus* × *Leymus triticoides*  
*Malus domestica*  
*Musa ABB*  
*Nicotiana tabacum*  
*Oncidium hybrid*  
*Petunia* × *hybrida*  
*Picea engelmannii* × *Picea glauca*  
*Populus alba* × *Populus glandulosa*  
*Populus fremontii* × *Populus angustifolia*  
*Populus tremula* × *Populus alba*  
*Populus tremula* × *Populus tremuloides*  
*Populus trichocarpa* × *Populus deltoides*  
*Populus trichocarpa* × *Populus nigra*  
*Prunus* × *yedoensis*  
*Pyrus* × *bretschneideri*  
*Pyrus hybrid*  
*Rosa hybrid*  
*Rubus ulmifolius* × *Rubus thyrsgiger*  
*Saccharum hybrid*

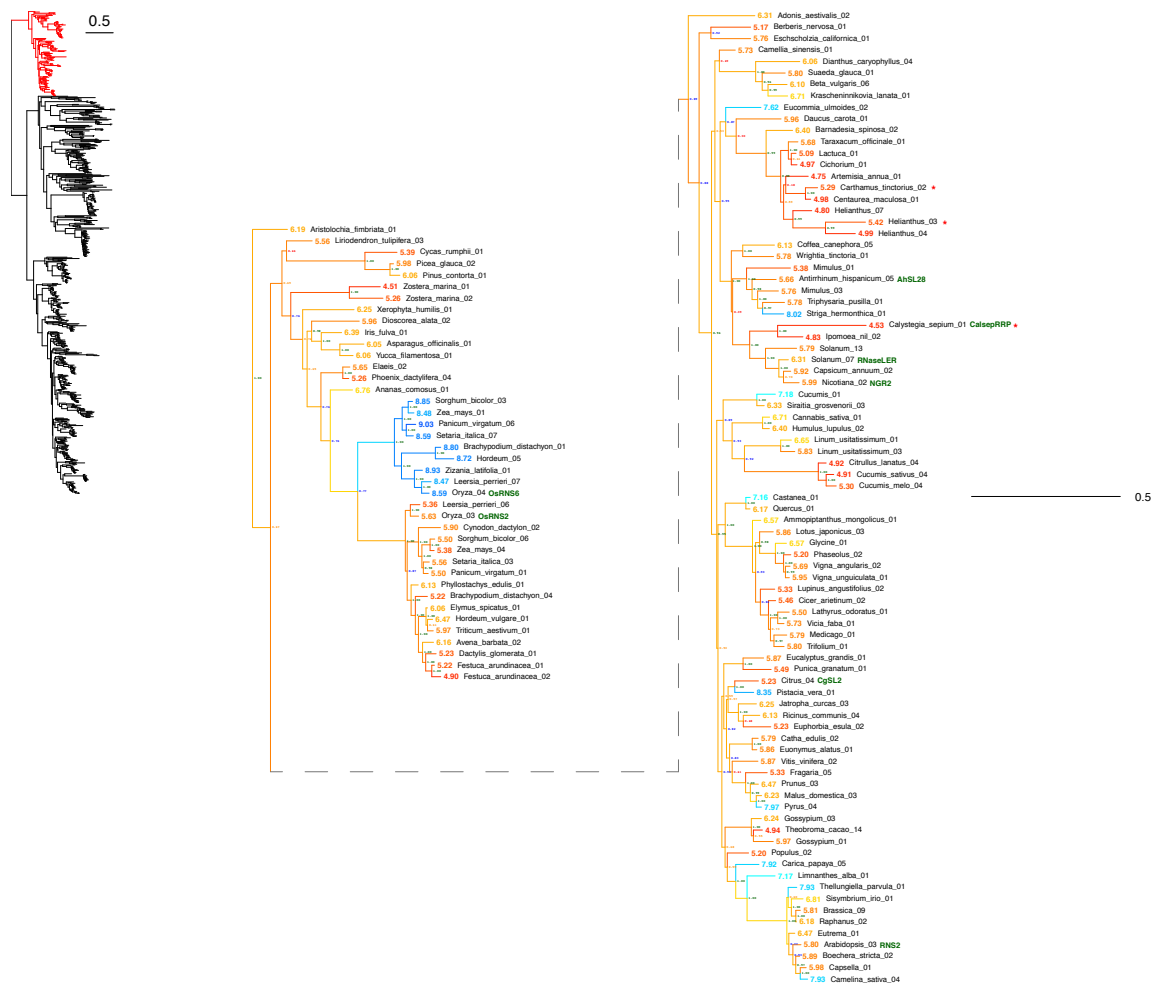

Figure S1: Phylogenetic relationships between T2/S-RNases in land plants. This is a more detailed version of the Figure 2. The rooted maximum-likelihood phylogram is shown, along with posterior support. Numbers to the right of the tree tips indicate the predicted isoelectric point (pI) value of the amino acid sequence. Corresponding tree tips are colored using these values, and values for the internal branches were reconstructed as described in the Methods. S-RNase alleles are indicated with dark blue “S-RNase”. The names of previously studied proteins are given in dark green. Red stars show sequences known to lack RNase function, or are inferred to lack the function based on absence of a histidine thought to be essential for that function.

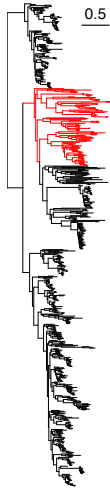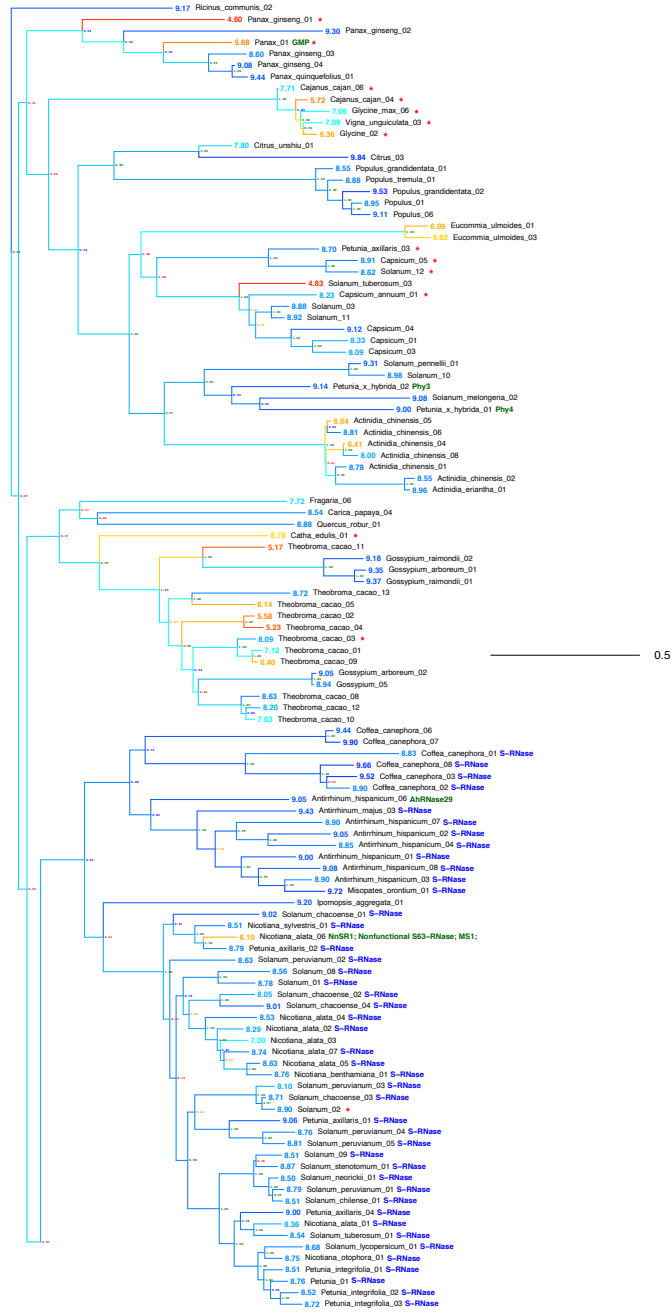

(b) Class III, Section A

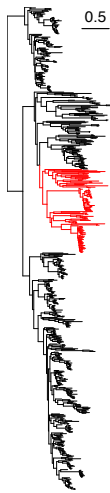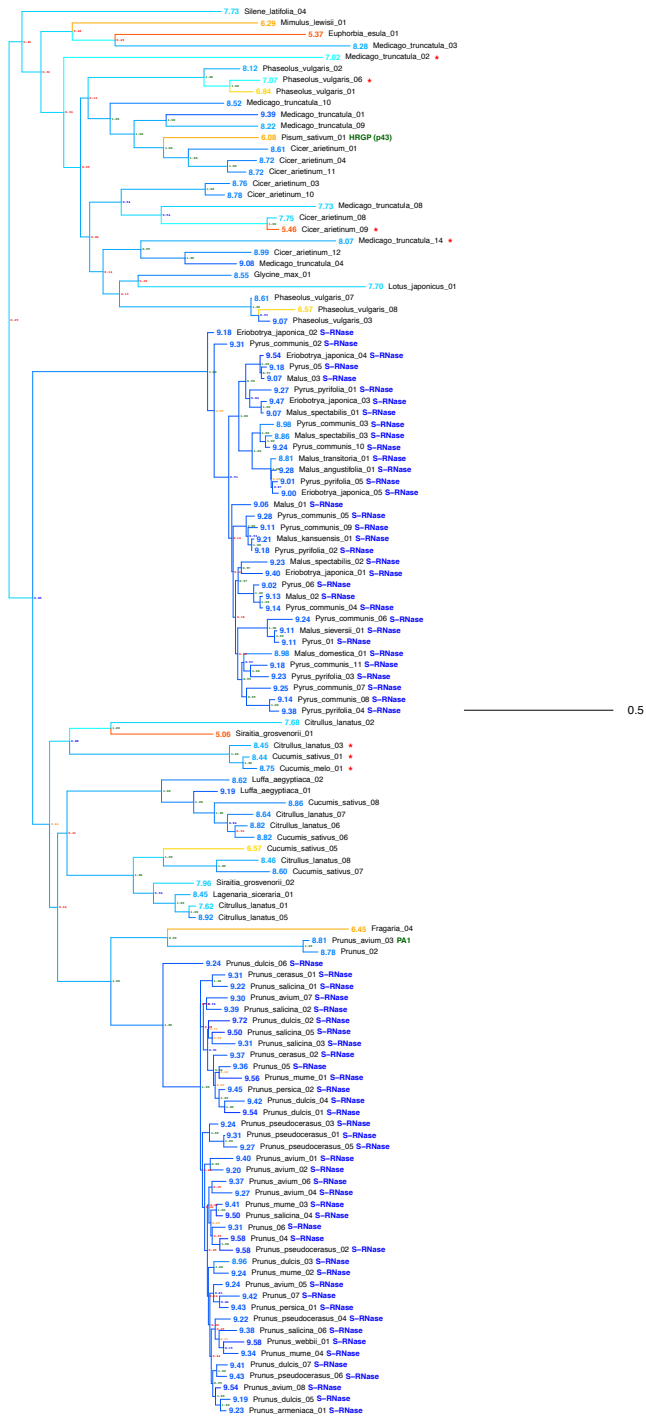

(c) Class III, Section B

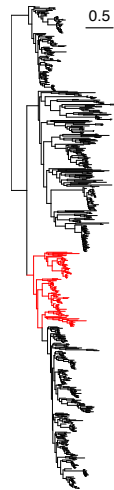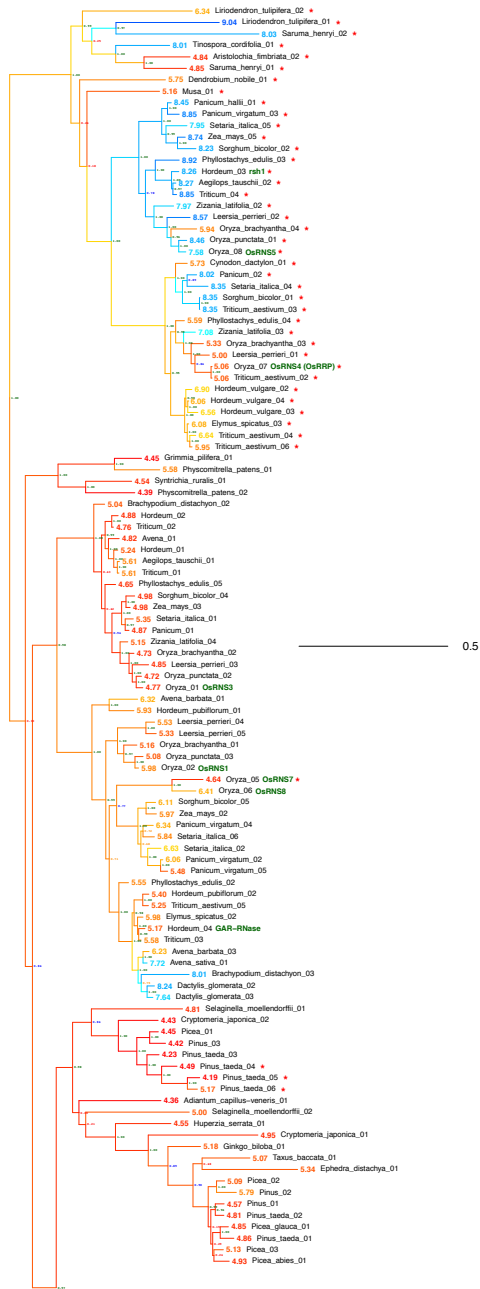

(d) Class I, Section A

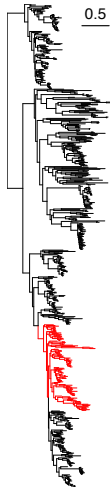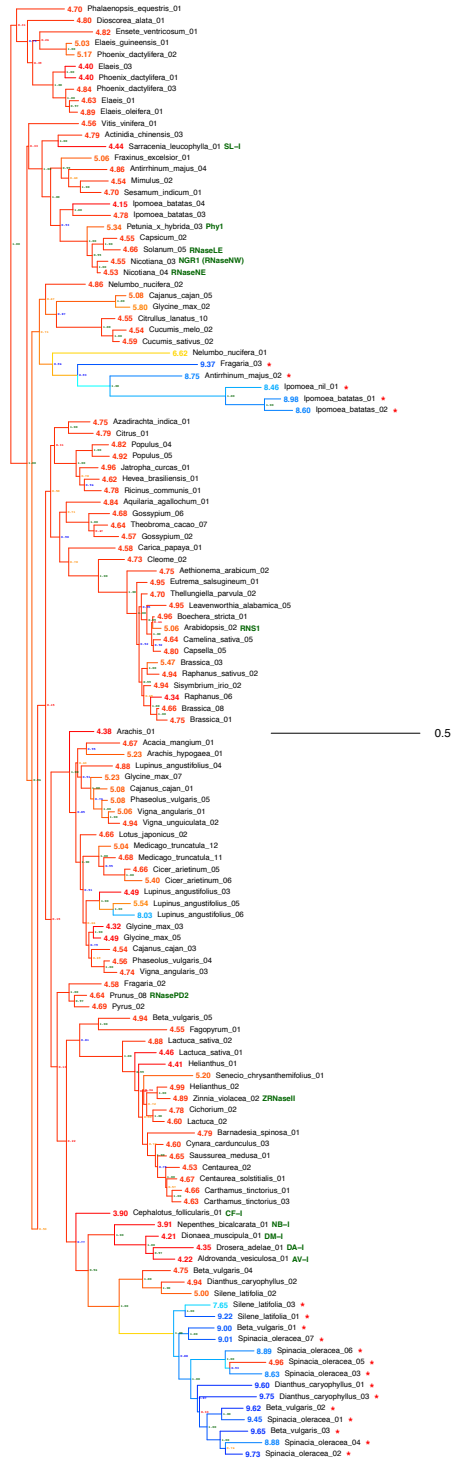

(e) Class I, Section B

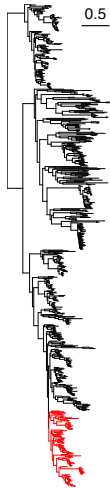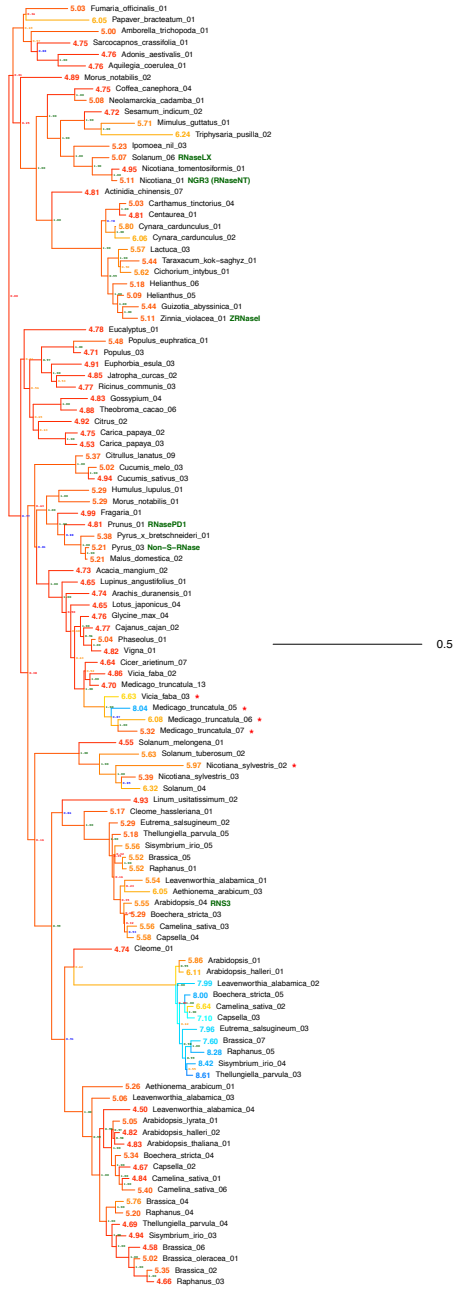

(f) Class I, Section C



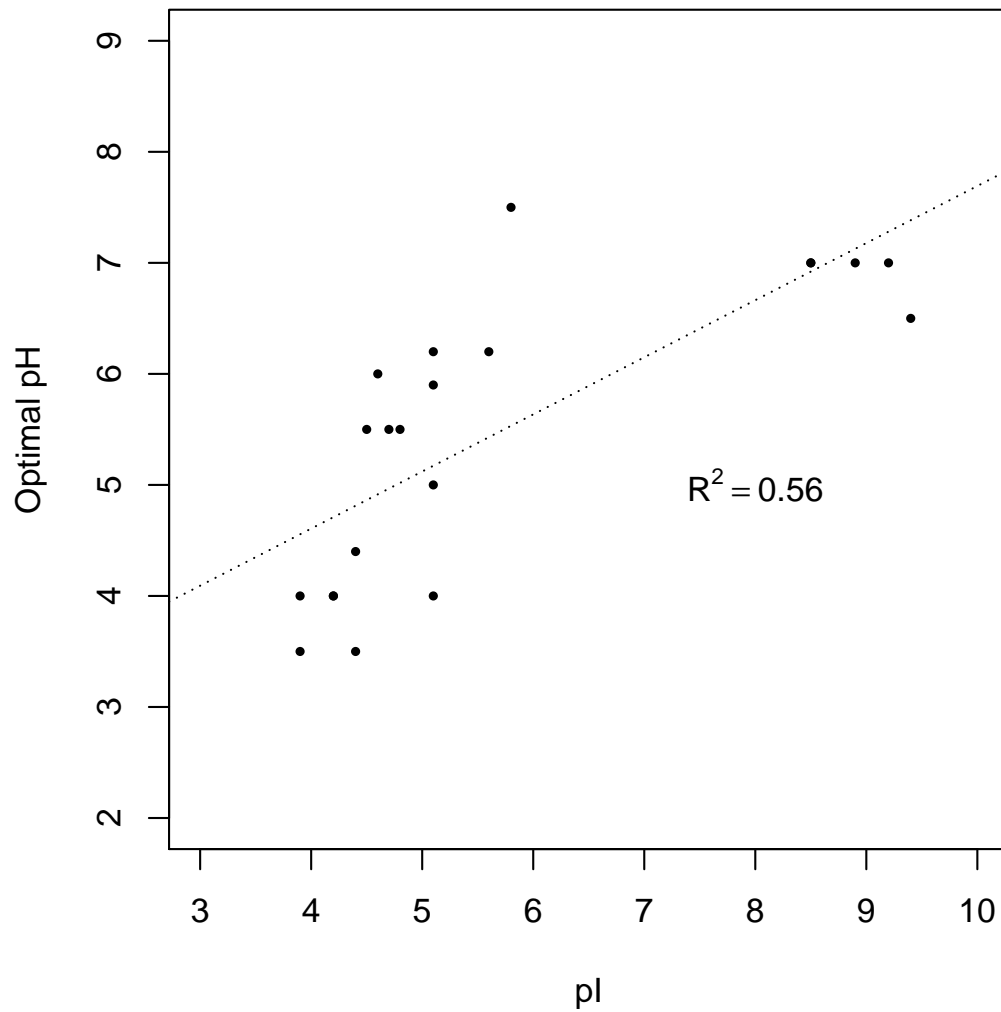

Figure S2: The relationship between calculated pI values and experimental pH optima for several T2/S-type RNases in land plants. The linear relationship is drawn only for visual reference.

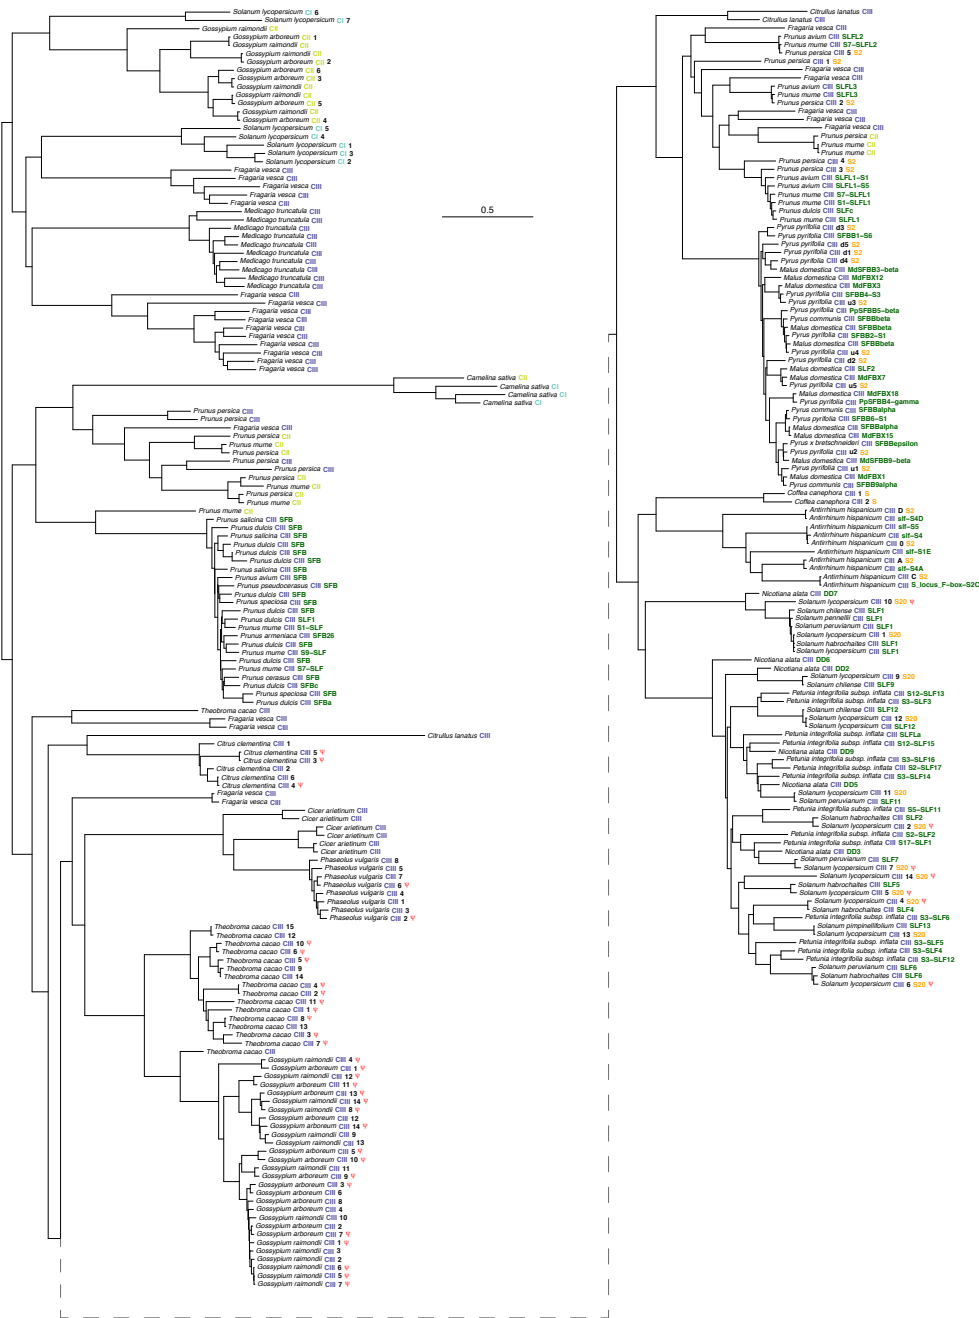

Figure S3: Gene tree of F-box-containing genes near T2/S-type RNases. ‘Class’ of the closest linked RNase is indicated immediately to the right of the species name. This figure includes all the F-box genes shown in Figure 5, and several other known S-locus F-box genes (names given in dark green). Black bold letters following the class designation indicate the F-box locus designation, and match the numbers given in Figure 5. Where available, the linked S-RNase allele is given (in orange). Possible pseudogenes—sequences with stop codons that prematurely interrupt reading frames—are indicated by  $\psi$ .

Table S1: Accessions and Genomic Sequences Used in this Study

| Tip Name                     | EST                                                                                                                                                                                                     | NT             | Genomic                       |
|------------------------------|---------------------------------------------------------------------------------------------------------------------------------------------------------------------------------------------------------|----------------|-------------------------------|
| Acacia_mangium_01            | FS588527.1                                                                                                                                                                                              | -              | -                             |
| Acacia_mangium_02            | FS590467.1                                                                                                                                                                                              | -              | -                             |
| Actinidia_chinensis_01       | -                                                                                                                                                                                                       | -              | Achinensi_04                  |
| Actinidia_chinensis_02       | FG491469.1, FG495535.1,<br>FG497037.1, FG497281.1,<br>FG500389.1, FG500436.1,<br>FG501326.1, FG513143.1                                                                                                 | -              | Achinensi_07,<br>Achinensi_10 |
| Actinidia_chinensis_03       | -                                                                                                                                                                                                       | -              | Achinensi_15                  |
| Actinidia_chinensis_04       | FG495163.1                                                                                                                                                                                              | -              | Achinensi_03                  |
| Actinidia_chinensis_05       | FG488689.1, FG489605.1,<br>FG490006.1, FG491542.1,<br>FG494339.1, FG494455.1,<br>FG494563.1, FG496651.1,<br>FG498987.1, FG501418.1,<br>FG525523.1, FG526342.1,<br>FG527807.1                            | -              | -                             |
| Actinidia_chinensis_06       | FG488513.1, FG490909.1,<br>FG492393.1, FG492662.1,<br>FG493600.1, FG495376.1,<br>FG496414.1, FG496613.1,<br>FG498230.1, FG499004.1,<br>FG500280.1, FG501523.1,<br>FG502059.1, FG513718.1,<br>FG514133.1 | -              | -                             |
| Actinidia_chinensis_07       | FG526389.1, FG526432.1,<br>FG527623.1                                                                                                                                                                   | -              | -                             |
| Actinidia_chinensis_08       | FG511324.1, FG517989.1,<br>FG525987.1, FG527061.1                                                                                                                                                       | -              | -                             |
| Actinidia_eriantha_01        | FG482843.1, FG508897.1                                                                                                                                                                                  | -              | -                             |
| Adiantum_capillus-veneris_01 | DK953962.1, DK956820.1                                                                                                                                                                                  | -              | -                             |
| Adonis_aestivalis_01         | FL510152.1                                                                                                                                                                                              | -              | -                             |
| Adonis_aestivalis_02         | FL509121.1, FL509488.1,<br>FL511827.1                                                                                                                                                                   | -              | -                             |
| Aegilops_tauschii_01         | -                                                                                                                                                                                                       | -              | Atauschii_06                  |
| Aegilops_tauschii_02         | -                                                                                                                                                                                                       | -              | Atauschii_07                  |
| Aethionema_arabicum_01       | -                                                                                                                                                                                                       | -              | Aarabicum_02                  |
| Aethionema_arabicum_02       | -                                                                                                                                                                                                       | -              | Aarabicum_03                  |
| Aethionema_arabicum_03       | -                                                                                                                                                                                                       | -              | Aarabicum_04                  |
| Aldrovanda-vesiculosa_01     | -                                                                                                                                                                                                       | AB872467.1     | -                             |
| Amborella_trichopoda_01      | CK760482.1, FD441563.1                                                                                                                                                                                  | XM_006827195.1 | Atrichopo_01                  |
| Ammopiptanthus_mongolicus_01 | JZ389161.1                                                                                                                                                                                              | -              | -                             |

| Tip Name                  | EST                                                                                                                                                                                                                                                                                                                                                                                                                                                                                                                                                                                                                                                                                                                                      | NT             | Genomic      |
|---------------------------|------------------------------------------------------------------------------------------------------------------------------------------------------------------------------------------------------------------------------------------------------------------------------------------------------------------------------------------------------------------------------------------------------------------------------------------------------------------------------------------------------------------------------------------------------------------------------------------------------------------------------------------------------------------------------------------------------------------------------------------|----------------|--------------|
| Ananas_comosus_01         | CO730744.1, CO730750.1,<br>CO730775.1, CO730783.1,<br>CO730849.1, CO730906.1,<br>CO730924.1, CO731011.1,<br>CO731024.1, CO731029.1,<br>CO731051.1, CO731055.1,<br>CO731074.1, CO731107.1,<br>CO731116.1, CO731327.1,<br>CO731361.1, CO731368.1,<br>CO731380.1, CO731389.1,<br>CO731395.1, CO731422.1,<br>CO731507.1, CO731516.1,<br>CO731556.1, CO731727.1,<br>CO731737.1, CO731744.1,<br>CO731762.1, CO731791.1,<br>CO731795.1, CO731814.1,<br>CO731831.1, CO731875.1,<br>CO731898.1, CO731921.1,<br>CO731942.1, CO731946.1,<br>CO731967.1, CO732011.1,<br>CO732026.1, CO732028.1,<br>CO732033.1, CO732042.1,<br>CO732080.1, CO732102.1,<br>CO732125.1, CO732157.1,<br>CO732179.1, CO732210.1,<br>CO732212.1, CO732250.1,<br>CO732253.1 | -              | -            |
| Antirrhinum_hispanicum_01 | -                                                                                                                                                                                                                                                                                                                                                                                                                                                                                                                                                                                                                                                                                                                                        | X96465.1       | -            |
| Antirrhinum_hispanicum_02 | -                                                                                                                                                                                                                                                                                                                                                                                                                                                                                                                                                                                                                                                                                                                                        | X96466.1       | -            |
| Antirrhinum_hispanicum_03 | -                                                                                                                                                                                                                                                                                                                                                                                                                                                                                                                                                                                                                                                                                                                                        | X96464.1       | -            |
| Antirrhinum_hispanicum_04 | -                                                                                                                                                                                                                                                                                                                                                                                                                                                                                                                                                                                                                                                                                                                                        | AJ315593.1     | -            |
| Antirrhinum_hispanicum_05 | -                                                                                                                                                                                                                                                                                                                                                                                                                                                                                                                                                                                                                                                                                                                                        | AJ315591.1     | -            |
| Antirrhinum_hispanicum_06 | -                                                                                                                                                                                                                                                                                                                                                                                                                                                                                                                                                                                                                                                                                                                                        | AJ315592.1     | -            |
| Antirrhinum_hispanicum_07 | -                                                                                                                                                                                                                                                                                                                                                                                                                                                                                                                                                                                                                                                                                                                                        | AJ440730.1     | -            |
| Antirrhinum_hispanicum_08 | -                                                                                                                                                                                                                                                                                                                                                                                                                                                                                                                                                                                                                                                                                                                                        | HE805271.1     | -            |
| Antirrhinum_majus_02      | AJ793159.1, AJ808829.1                                                                                                                                                                                                                                                                                                                                                                                                                                                                                                                                                                                                                                                                                                                   | -              | -            |
| Antirrhinum_majus_03      | AJ790678.1, AJ804705.1                                                                                                                                                                                                                                                                                                                                                                                                                                                                                                                                                                                                                                                                                                                   | -              | -            |
| Antirrhinum_majus_04      | AJ802912.1, AJ808165.1                                                                                                                                                                                                                                                                                                                                                                                                                                                                                                                                                                                                                                                                                                                   | -              | -            |
| Aquilaria_agallochum_01   | -                                                                                                                                                                                                                                                                                                                                                                                                                                                                                                                                                                                                                                                                                                                                        | -              | Aagalloch_01 |
| Aquilegia_coerulea_01     | -                                                                                                                                                                                                                                                                                                                                                                                                                                                                                                                                                                                                                                                                                                                                        | -              | Acoerulea_01 |
| Arabidopsis_halleri_01    | -                                                                                                                                                                                                                                                                                                                                                                                                                                                                                                                                                                                                                                                                                                                                        | -              | Ahalleri_03  |
| Arabidopsis_halleri_02    | -                                                                                                                                                                                                                                                                                                                                                                                                                                                                                                                                                                                                                                                                                                                                        | -              | Ahalleri_04  |
| Arabidopsis_lyrata_01     | -                                                                                                                                                                                                                                                                                                                                                                                                                                                                                                                                                                                                                                                                                                                                        | XM_002892750.1 | Alyrata_02   |
| Arabidopsis_thaliana_01   | -                                                                                                                                                                                                                                                                                                                                                                                                                                                                                                                                                                                                                                                                                                                                        | NM_101288.1    | Athaliana_02 |

| Tip Name                  | EST                                                                                                                                                                                                                                | NT                                                                                                            | Genomic                               |
|---------------------------|------------------------------------------------------------------------------------------------------------------------------------------------------------------------------------------------------------------------------------|---------------------------------------------------------------------------------------------------------------|---------------------------------------|
| Arabidopsis_01            | AI998583.1, AV537553.1, AV538896.1, AV549500.1, AV551274.1, BE037901.1, BP571466.1                                                                                                                                                 | BT010136.1, BX816723.1, NM_101287.3, XM_002892749.1                                                           | Alyrata_01, Athaliana_01              |
| Arabidopsis_02            | AV553021.1, AV830199.1, BE523813.1, CB252787.1, CB254203.1, CB255251.1, DR374194.1, EG517946.1, EG517947.1                                                                                                                         | AY072413.1, AY086747.1, AY114710.1, BX821791.1, DQ446504.1, DQ652992.1, NM_126351.2, U05206.1, XM_002875137.1 | Alyrata_05, Athaliana_04              |
| Arabidopsis_03            | AV527174.1, AV825172.1, CD529387.1, CK121456.1, DR268917.1, DR268918.1, DR268919.1, DR268920.1, DR268921.1, DR268923.1, DR268925.1, DR268927.1, DR268928.1, DR268929.1, DR268930.1, DR268934.1, DR268935.1, DR268936.1, DR268937.1 | BT025792.1, BX819005.1, BX819504.1, BX821463.1, M98336.1, NM_129536.4, XM_002879771.1                         | Alyrata_04, Athaliana_05              |
| Arabidopsis_04            | AV824900.1, AV828266.1, BP811763.1, DR279160.1, DR279162.1, DR279163.1, DR279164.1, DR279165.1, DR279166.1, DR279167.1, DR279168.1, DR279170.1, DR279171.1, DR371552.1, DR377825.1                                                 | AY063844.1, AY088821.1, AY117288.1, BX816205.1, BX818538.1, NM_102446.2, U05207.1, XM_002890585.1             | Ahalleri_01, Alyrata_03, Athaliana_03 |
| Arachis_duranensis_01     | GW927913.1, GW928481.1, GW934909.1, GW936332.1, GW938313.1, GW938837.1, GW947666.1, GW955425.1                                                                                                                                     | -                                                                                                             | -                                     |
| Arachis_hypogaea_01       | EE127593.1, ES759700.1, GO259579.1                                                                                                                                                                                                 | -                                                                                                             | -                                     |
| Arachis_01                | EH042149.1, EH042940.1, EH043002.1, EH043293.1, GW956370.1, GW987623.1                                                                                                                                                             | -                                                                                                             | -                                     |
| Aristolochia_fimbriata_01 | FD755703.1                                                                                                                                                                                                                         | -                                                                                                             | -                                     |
| Aristolochia_fimbriata_02 | FD755819.1, FD763976.1, FD764154.1, FD764251.1                                                                                                                                                                                     | -                                                                                                             | -                                     |
| Artemisia_annua_01        | EY110594.1, EY110595.1                                                                                                                                                                                                             | -                                                                                                             | -                                     |

| Tip Name                   | EST                                                                                                                                                                                                                                            | NT                                           | Genomic      |
|----------------------------|------------------------------------------------------------------------------------------------------------------------------------------------------------------------------------------------------------------------------------------------|----------------------------------------------|--------------|
| Asparagus_officinalis_01   | CV291711.1                                                                                                                                                                                                                                     | -                                            | -            |
| Avena_barbata_01           | GR363868.1                                                                                                                                                                                                                                     | -                                            | -            |
| Avena_barbata_02           | GR366131.1                                                                                                                                                                                                                                     | -                                            | -            |
| Avena_barbata_03           | GR350960.1, GR350961.1,<br>GR351290.1, GR351291.1                                                                                                                                                                                              | -                                            | -            |
| Avena_sativa_01            | GO594607.1                                                                                                                                                                                                                                     | -                                            | -            |
| Avena_01                   | GO594668.1, GR343335.1,<br>GR343336.1, GR361714.1,<br>GR361715.1, GR366858.1,<br>GR366859.1                                                                                                                                                    | -                                            | -            |
| Azadirachta_indica_01      | -                                                                                                                                                                                                                                              | -                                            | Aindica_02   |
| Barnadesia_spinosa_01      | GE523589.1                                                                                                                                                                                                                                     | -                                            | -            |
| Barnadesia_spinosa_02      | GE548969.1                                                                                                                                                                                                                                     | -                                            | -            |
| Berberis_nervosa_01        | JG621270.1                                                                                                                                                                                                                                     | -                                            | -            |
| Beta_vulgaris_01           | CK136765.1, CV301955.1,<br>CV301956.1, CV301970.1,<br>FG344579.1                                                                                                                                                                               | -                                            | Bvulgaris_04 |
| Beta_vulgaris_02           | -                                                                                                                                                                                                                                              | -                                            | Bvulgaris_01 |
| Beta_vulgaris_03           | -                                                                                                                                                                                                                                              | -                                            | Bvulgaris_02 |
| Beta_vulgaris_04           | -                                                                                                                                                                                                                                              | -                                            | Bvulgaris_05 |
| Beta_vulgaris_05           | -                                                                                                                                                                                                                                              | -                                            | Bvulgaris_06 |
| Beta_vulgaris_06           | -                                                                                                                                                                                                                                              | -                                            | Bvulgaris_07 |
| Boechera_stricta_01        | -                                                                                                                                                                                                                                              | -                                            | Bstricta_05  |
| Boechera_stricta_02        | -                                                                                                                                                                                                                                              | -                                            | Bstricta_04  |
| Boechera_stricta_03        | -                                                                                                                                                                                                                                              | -                                            | Bstricta_01  |
| Boechera_stricta_04        | -                                                                                                                                                                                                                                              | -                                            | Bstricta_02  |
| Boechera_stricta_05        | -                                                                                                                                                                                                                                              | -                                            | Bstricta_03  |
| Brachypodium_distachyon_01 | -                                                                                                                                                                                                                                              | XM_003567311.1                               | Bdistachy_03 |
| Brachypodium_distachyon_02 | DV469105.1, DV469570.1,<br>DV469893.1, DV470064.1,<br>DV470073.1, DV470214.1,<br>DV470623.1, DV470669.1,<br>DV471802.1, DV471970.1,<br>DV472223.1, DV480909.1,<br>DV482102.1, DV485062.1,<br>HX799208.1, HX810128.1,<br>HX813127.1, HX849197.1 | AK428392.1,<br>AK432789.1,<br>XM_003574507.1 | -            |
| Brachypodium_distachyon_03 | DV469148.1, DV469525.1,<br>DV472668.1, DV478177.1,<br>DV479070.1, DV479431.1,<br>DV487490.1, DV487610.1,<br>DV487695.1, GT768236.1                                                                                                             | XM_003562584.1                               | Bdistachy_01 |

| Tip Name                   | EST                                                                                                                                                                                                                                                                                                                                                                                                                                                                                                              | NT             | Genomic                                               |
|----------------------------|------------------------------------------------------------------------------------------------------------------------------------------------------------------------------------------------------------------------------------------------------------------------------------------------------------------------------------------------------------------------------------------------------------------------------------------------------------------------------------------------------------------|----------------|-------------------------------------------------------|
| Brachypodium_distachyon_04 | GT802058.1, GT802059.1,<br>GT802801.1, GT802802.1,<br>GT839939.1, GT857087.1,<br>GT857088.1                                                                                                                                                                                                                                                                                                                                                                                                                      | XM_003564788.1 | Bdistachy_02                                          |
| Brassica_oleracea_01       | -                                                                                                                                                                                                                                                                                                                                                                                                                                                                                                                | -              | Boleracea_06                                          |
| Brassica_01                | -                                                                                                                                                                                                                                                                                                                                                                                                                                                                                                                | -              | Bnapus_04,<br>Boleracea_02                            |
| Brassica_02                | -                                                                                                                                                                                                                                                                                                                                                                                                                                                                                                                | -              | Bnapus_10,<br>Brapa_07                                |
| Brassica_03                | AM056981.1, BG544073.1,<br>DK479624.1, DK492679.1,<br>DK512724.1, DK513017.1,<br>DK539221.1, DK572295.1,<br>DK572589.1, EG020458.1,<br>ES914420.1, ES924200.1,<br>ES999572.1, EV058045.1,<br>EV084943.1, EV108074.1,<br>EV108336.1, EV143112.1,<br>EV143322.1, EV175440.1,<br>EV226407.1, EV226595.1,<br>EV227123.1, EX029702.1,<br>EX031006.1, EX031841.1,<br>EX034109.1, EX038258.1,<br>EX054449.1, EX121537.1,<br>EX132544.1, FG562410.1,<br>FG563283.1, FG568654.1,<br>FG572345.1, FY419976.1,<br>FY424953.1 | -              | Bnapus_23,<br>Boleracea_03,<br>Brapa_01               |
| Brassica_04                | -                                                                                                                                                                                                                                                                                                                                                                                                                                                                                                                | -              | Boleracea_04,<br>Brapa_05                             |
| Brassica_05                | CD820402.1, CD821532.1,<br>CD822406.1, CN727519.1,<br>CX189046.1, DK468071.1,<br>DK477875.1, DK527692.1,<br>DK537473.1, EE471039.1,<br>EE477074.1, EE529422.1,<br>ES994755.1, EV041828.1,<br>EV055301.1, EV078567.1,<br>EV108094.1, EV108378.1,<br>EV178717.1, EV178746.1,<br>EV178801.1, EV178837.1,<br>EX065458.1, EX080443.1,<br>FG554243.1, FG561185.1                                                                                                                                                       | -              | Bnapus_07,<br>Bnapus_20,<br>Boleracea_08,<br>Brapa_04 |

| <b>Tip Name</b> | <b>EST</b>                                                                                                                                        | <b>NT</b> | <b>Genomic</b>            |
|-----------------|---------------------------------------------------------------------------------------------------------------------------------------------------|-----------|---------------------------|
| Brassica_06     | EX114048.1                                                                                                                                        | -         | Bnapus_17,<br>Brapa_06    |
| Brassica_07     | EE427567.1, EE473060.1,<br>ES926971.1, ES982475.1,<br>EV000363.1, EV003794.1,<br>EV057217.1, EV086590.1,<br>EX075292.1, FG572729.1,<br>FG576312.1 | -         | Boleracea_05,<br>Brapa_08 |
| Brassica_08     | EE558593.1, EE566282.1,<br>ES981091.1, EV043872.1,<br>EX120531.1, FY418762.1,<br>FY419588.1, FY423805.1,<br>FY424593.1                            | -         | Brapa_03                  |



| Tip Name    | EST                                                                                                                                                                                                                                                                                                                                                                                                                                                                                                                                                                                                                                                                                                                                                                                                                                                                                                                                                                                                                                                                                                                                                                                                                                                                                                              | NT | Genomic                                 |
|-------------|------------------------------------------------------------------------------------------------------------------------------------------------------------------------------------------------------------------------------------------------------------------------------------------------------------------------------------------------------------------------------------------------------------------------------------------------------------------------------------------------------------------------------------------------------------------------------------------------------------------------------------------------------------------------------------------------------------------------------------------------------------------------------------------------------------------------------------------------------------------------------------------------------------------------------------------------------------------------------------------------------------------------------------------------------------------------------------------------------------------------------------------------------------------------------------------------------------------------------------------------------------------------------------------------------------------|----|-----------------------------------------|
| Brassica_09 | BQ791108.1, CX187879.1,<br>CX192184.1, DK462087.1,<br>DK462128.1, DK472869.1,<br>DK477240.1, DK477490.1,<br>DK478901.1, DK497331.1,<br>DK500091.1, DK508417.1,<br>DK508904.1, DK510642.1,<br>DK512437.1, DK532487.1,<br>DK536841.1, DK537090.1,<br>DK538497.1, DK556906.1,<br>DK559658.1, DK567975.1,<br>DK568462.1, DK570210.1,<br>DK572008.1, DN964240.1,<br>DY022538.1, DY024678.1,<br>EE419065.1, EE439150.1,<br>EE444732.1, EE455270.1,<br>EE459219.1, EE459601.1,<br>EE518278.1, EE520465.1,<br>EH429345.1, EH429349.1,<br>EL588658.1, ES905544.1,<br>ES911554.1, ES930251.1,<br>EV020544.1, EV025000.1,<br>EV039587.1, EV039598.1,<br>EV042300.1, EV047257.1,<br>EV058891.1, EV062511.1,<br>EV087573.1, EV115631.1,<br>EV115711.1, EV148223.1,<br>EV148421.1, EV148564.1,<br>EV148607.1, EV148835.1,<br>EV169887.1, EV179837.1,<br>EV179910.1, EV210347.1,<br>EV210648.1, EV217905.1,<br>EV218129.1, EX026280.1,<br>EX026471.1, EX031926.1,<br>EX034305.1, EX036983.1,<br>EX044586.1, EX055299.1,<br>EX086802.1, EX090579.1,<br>EX095057.1, EX112100.1,<br>EX112965.1, EX112983.1,<br>EX122102.1, EX125266.1,<br>EX134890.1, FY063751.1,<br>FY068420.1, FY418592.1,<br>FY420627.1, FY420650.1,<br>FY422825.1, FY423639.1,<br>FY425586.1, FY425608.1,<br>FY427737.1, GR717444.1,<br>GR727199.1, GT017220.1 | -  | Bnapus_06,<br>Boleracea_07,<br>Brapa_02 |

| Tip Name             | EST                                                              | NT                                                   | Genomic                                  |
|----------------------|------------------------------------------------------------------|------------------------------------------------------|------------------------------------------|
| Bryopsis_maxima_01   | -                                                                | AB164319.1                                           | -                                        |
| Cajanus_cajan_01     | -                                                                | -                                                    | Ccajan_01                                |
| Cajanus_cajan_02     | -                                                                | -                                                    | Ccajan_03                                |
| Cajanus_cajan_03     | -                                                                | -                                                    | Ccajan_04                                |
| Cajanus_cajan_04     | -                                                                | -                                                    | Ccajan_06,<br>Ccajan_07                  |
| Cajanus_cajan_05     | -                                                                | -                                                    | Ccajan_09                                |
| Cajanus_cajan_06     | -                                                                | -                                                    | Ccajan_10                                |
| Calystegia_sepium_01 | -                                                                | AF139660.1                                           | -                                        |
| Camelina_sativa_01   | -                                                                | -                                                    | Csativa_05,<br>Csativa_11,<br>Csativa_22 |
| Camelina_sativa_02   | -                                                                | -                                                    | Csativa_09,<br>Csativa_20                |
| Camelina_sativa_03   | -                                                                | -                                                    | Csativa_07,<br>Csativa_12,<br>Csativa_23 |
| Camelina_sativa_04   | -                                                                | -                                                    | Csativa_16,<br>Csativa_17,<br>Csativa_19 |
| Camelina_sativa_05   | -                                                                | -                                                    | Csativa_13,<br>Csativa_14,<br>Csativa_18 |
| Camelina_sativa_06   | -                                                                | -                                                    | Csativa_03,<br>Csativa_21                |
| Camellia_sinensis_01 | FS946497.1, JZ495050.1                                           | -                                                    | -                                        |
| Cannabis_sativa_01   | JK493968.1                                                       | -                                                    | Csativa_02                               |
| Capsella_01          | -                                                                | XM_006294762.1                                       | Cgrandifl_01,<br>Crubella_04             |
| Capsella_02          | -                                                                | XM_006303663.1                                       | Cgrandifl_04,<br>Crubella_02             |
| Capsella_03          | -                                                                | XM_006304074.1,<br>XM_006304075.1,<br>XM_006304190.1 | Cgrandifl_05,<br>Crubella_01             |
| Capsella_04          | -                                                                | XM_006305453.1                                       | Cgrandifl_02,<br>Crubella_03             |
| Capsella_05          | -                                                                | XM_006291733.1                                       | Cgrandifl_06,<br>Crubella_05             |
| Capsicum_annuum_01   | GD091034.1, GD099048.1,<br>GD130204.1, GD130568.1,<br>GD135382.1 | -                                                    | -                                        |
| Capsicum_annuum_02   | GD053097.1, GD078635.1,<br>GD114480.1, GO344514.1                | -                                                    | -                                        |

| <b>Tip Name</b> | <b>EST</b>                                        | <b>NT</b> | <b>Genomic</b> |
|-----------------|---------------------------------------------------|-----------|----------------|
| Capsicum_01     | CA524640.1, CA525274.1,<br>GD105480.1, GD108347.1 | -         | Cchinense_02   |
| Capsicum_02     | BM062630.1, BM064258.1,<br>GD102513.1             | -         | Cchinense_10   |

| Tip Name    | EST                                                                                                                                                                                                                                                                                                                                                                                                                                                                                                                                                                                                                                                                                                                                                                                                                                                                                                                                                                                                                                                                                                                                                                                                                                                                                                                                         | NT | Genomic      |
|-------------|---------------------------------------------------------------------------------------------------------------------------------------------------------------------------------------------------------------------------------------------------------------------------------------------------------------------------------------------------------------------------------------------------------------------------------------------------------------------------------------------------------------------------------------------------------------------------------------------------------------------------------------------------------------------------------------------------------------------------------------------------------------------------------------------------------------------------------------------------------------------------------------------------------------------------------------------------------------------------------------------------------------------------------------------------------------------------------------------------------------------------------------------------------------------------------------------------------------------------------------------------------------------------------------------------------------------------------------------|----|--------------|
| Capsicum_03 | BM067364.1, CA514041.1,<br>CA522278.1, CA522797.1,<br>CA522802.1, CA522971.1,<br>CA523320.1, CA524353.1,<br>CA525501.1, CA525906.1,<br>CA526000.1, CA526151.1,<br>CA526252.1, CA526262.1,<br>GD063560.1, GD064008.1,<br>GD065163.1, GD066316.1,<br>GD081583.1, GD081685.1,<br>GD081824.1, GD081983.1,<br>GD082209.1, GD082231.1,<br>GD082315.1, GD082324.1,<br>GD082337.1, GD082901.1,<br>GD082983.1, GD082991.1,<br>GD083386.1, GD083703.1,<br>GD083788.1, GD083943.1,<br>GD084158.1, GD084224.1,<br>GD084533.1, GD084876.1,<br>GD084877.1, GD085143.1,<br>GD085252.1, GD085333.1,<br>GD085443.1, GD085445.1,<br>GD085453.1, GD085456.1,<br>GD085663.1, GD085676.1,<br>GD086011.1, GD086175.1,<br>GD086581.1, GD086700.1,<br>GD086708.1, GD086763.1,<br>GD086787.1, GD086853.1,<br>GD087019.1, GD087346.1,<br>GD087774.1, GD087852.1,<br>GD088290.1, GD088510.1,<br>GD088823.1, GD089339.1,<br>GD089441.1, GD089455.1,<br>GD089568.1, GD089739.1,<br>GD089906.1, GD090030.1,<br>GD090204.1, GD090460.1,<br>GD090606.1, GD090618.1,<br>GD091319.1, GD091601.1,<br>GD091987.1, GD092350.1,<br>GD092584.1, GD092966.1,<br>GD093107.1, GD093118.1,<br>GD093218.1, GD093225.1,<br>GD095430.1, GD096359.1,<br>GD097128.1, GD097645.1,<br>GD097755.1, GD097803.1,<br>GD098455.1, GD110415.1,<br>GD128419.1, GD128931.1,<br>GD129080.1, GD129523.1 | -  | Cchinense_06 |

| Tip Name                  | EST                                                                                                                                                                                                                                                                                                                                            | NT         | Genomic                   |
|---------------------------|------------------------------------------------------------------------------------------------------------------------------------------------------------------------------------------------------------------------------------------------------------------------------------------------------------------------------------------------|------------|---------------------------|
| Capsicum_04               | CA517702.1, GD087609.1,<br>GD091398.1, GD097925.1,<br>GD128857.1, GD129888.1,<br>GD132096.1, GD132368.1,<br>GD132770.1, GD133753.1,<br>GD133764.1                                                                                                                                                                                              | -          | Cchinense_08              |
| Capsicum_05               | BM063612.1, CA514048.1,<br>GD065126.1, GD065629.1,<br>GD069409.1, GD087117.1,<br>GD087166.1, GD087417.1,<br>GD087579.1, GD088204.1,<br>GD088755.1, GD089531.1,<br>GD089909.1, GD090894.1,<br>GD091246.1, GD091295.1,<br>GD091320.1, GD091436.1,<br>GD092002.1, GD092192.1,<br>GD092523.1, GD092796.1,<br>GD094442.1, GD094560.1,<br>GD130472.1 | AF168415.1 | Cchinense_12              |
| Carica_papaya_01          | EX290976.1, EX294020.1                                                                                                                                                                                                                                                                                                                         | -          | Cpapaya_01                |
| Carica_papaya_02          | -                                                                                                                                                                                                                                                                                                                                              | -          | Cpapaya_02                |
| Carica_papaya_03          | -                                                                                                                                                                                                                                                                                                                                              | -          | Cpapaya_03,<br>Cpapaya_04 |
| Carica_papaya_04          | EX293834.1                                                                                                                                                                                                                                                                                                                                     | -          | Cpapaya_05                |
| Carica_papaya_05          | EX283022.1, EX287534.1,<br>EX299763.1                                                                                                                                                                                                                                                                                                          | -          | Cpapaya_06                |
| Carthamus_tinctorius_01   | EL409301.1                                                                                                                                                                                                                                                                                                                                     | -          | -                         |
| Carthamus_tinctorius_02   | EL410866.1                                                                                                                                                                                                                                                                                                                                     | -          | -                         |
| Carthamus_tinctorius_03   | EL394361.1, EL399055.1                                                                                                                                                                                                                                                                                                                         | -          | -                         |
| Carthamus_tinctorius_04   | EL404327.1, EL405018.1,<br>EL412373.1, EL511134.1                                                                                                                                                                                                                                                                                              | -          | -                         |
| Castanea_01               | GO923926.1                                                                                                                                                                                                                                                                                                                                     | AB609975.1 | -                         |
| Catha_edulis_01           | JG724177.1, JG724380.1,<br>JG725576.1, JG728114.1                                                                                                                                                                                                                                                                                              | -          | -                         |
| Catha_edulis_02           | JG726341.1                                                                                                                                                                                                                                                                                                                                     | -          | -                         |
| Centaurea_maculosa_01     | EH734241.1                                                                                                                                                                                                                                                                                                                                     | -          | -                         |
| Centaurea_solstitialis_01 | EH756434.1                                                                                                                                                                                                                                                                                                                                     | -          | -                         |
| Centaurea_01              | EH726676.1, EH726937.1,<br>EH728982.1, EH731390.1,<br>EH736019.1, EH737022.1,<br>EH737238.1, EH738989.1,<br>EH739977.1, EH746764.1,<br>EH754204.1, EH782627.1,<br>EH790438.1, EH791022.1                                                                                                                                                       | -          | -                         |

| Tip Name                     | EST                                                                                                     | NT                                                                      | Genomic                       |
|------------------------------|---------------------------------------------------------------------------------------------------------|-------------------------------------------------------------------------|-------------------------------|
| Centaurea_02                 | EH741788.1, EH746815.1,<br>EH779170.1, EH781872.1,<br>EH782470.1, EH783954.1,<br>EH788668.1             | -                                                                       | -                             |
| Cephalotus_follicularis_01   | -                                                                                                       | AB811227.1,<br>AB811228.1                                               | -                             |
| Chlamydomonas_reinhardtii_01 | -                                                                                                       | XM_001691327.1                                                          | -                             |
| Cicer_arietinum_01           | -                                                                                                       | XM_004515129.1                                                          | Carietinu_04                  |
| Cicer_arietinum_02           | -                                                                                                       | XM_004510673.1                                                          | Carietinu_10                  |
| Cicer_arietinum_03           | -                                                                                                       | -                                                                       | Carietinu_11                  |
| Cicer_arietinum_04           | -                                                                                                       | XM_004505964.1                                                          | Carietinu_13                  |
| Cicer_arietinum_05           | -                                                                                                       | NM_001279158.1,<br>XM_004490009.1                                       | Carietinu_26,<br>Carietinu_27 |
| Cicer_arietinum_06           | -                                                                                                       | XM_004490010.1                                                          | Carietinu_29                  |
| Cicer_arietinum_07           | -                                                                                                       | XM_004490011.1                                                          | Carietinu_30                  |
| Cicer_arietinum_08           | -                                                                                                       | XM_004486248.1                                                          | Carietinu_31                  |
| Cicer_arietinum_09           | -                                                                                                       | -                                                                       | Carietinu_33                  |
| Cicer_arietinum_10           | -                                                                                                       | XM_004505328.1                                                          | Carietinu_12                  |
| Cicer_arietinum_11           | -                                                                                                       | XM_004506033.1                                                          | Carietinu_14                  |
| Cicer_arietinum_12           | -                                                                                                       | XM_004506950.1,<br>XM_004506951.1,<br>XM_004506952.1,<br>XM_004506953.1 | Carietinu_15                  |
| Cichorium_intybus_01         | EH689540.1, EH690990.1,<br>EH691693.1, EH694059.1,<br>EH694971.1, EH705764.1,<br>EH710070.1             | -                                                                       | -                             |
| Cichorium_01                 | EH675645.1, EH686758.1,<br>EH690447.1, EH697682.1,<br>EL362594.1                                        | -                                                                       | -                             |
| Cichorium_02                 | EH700926.1, EH700931.1,<br>EH701605.1, EH703994.1,<br>EH706515.1, EH708041.1,<br>EH710258.1, EL368961.1 | -                                                                       | -                             |
| Citrullus_lanatus_01         | JG701453.1, JG703248.1,<br>JG703489.1, JG703960.1,<br>JG704854.1, JG705223.1                            | -                                                                       | -                             |
| Citrullus_lanatus_02         | GD176302.1, GD176310.1,<br>GD176866.1, GD177196.1,<br>GD178968.1, GD179422.1,<br>GD179662.1, GD180521.1 | -                                                                       | Clanatus_13                   |

| Tip Name              | EST                                                                                                                                                                                                                                            | NT                                                                                                               | Genomic                       |
|-----------------------|------------------------------------------------------------------------------------------------------------------------------------------------------------------------------------------------------------------------------------------------|------------------------------------------------------------------------------------------------------------------|-------------------------------|
| Citrullus_lanatus_03  | DV737378.1, DV737589.1,<br>GD174072.1, GD174216.1,<br>GD178242.1                                                                                                                                                                               | -                                                                                                                | Clanatus_14                   |
| Citrullus_lanatus_04  | -                                                                                                                                                                                                                                              | -                                                                                                                | Clanatus_01                   |
| Citrullus_lanatus_05  | -                                                                                                                                                                                                                                              | -                                                                                                                | Clanatus_02                   |
| Citrullus_lanatus_06  | -                                                                                                                                                                                                                                              | -                                                                                                                | Clanatus_07                   |
| Citrullus_lanatus_07  | -                                                                                                                                                                                                                                              | -                                                                                                                | Clanatus_08                   |
| Citrullus_lanatus_08  | -                                                                                                                                                                                                                                              | -                                                                                                                | Clanatus_09                   |
| Citrullus_lanatus_09  | -                                                                                                                                                                                                                                              | -                                                                                                                | Clanatus_10                   |
| Citrullus_lanatus_10  | -                                                                                                                                                                                                                                              | -                                                                                                                | Clanatus_11                   |
| Citrus_unshiu_01      | DC899732.1                                                                                                                                                                                                                                     | -                                                                                                                | -                             |
| Citrus_01             | CF835859.1, CX044215.1,<br>CX044216.1, CX295559.1                                                                                                                                                                                              | XM_006438634.1,<br>XM_006438635.1,<br>XM_006483087.1                                                             | Cclementi_02,<br>Csinensis_01 |
| Citrus_02             | CX045273.1, CX045274.1,<br>DC884478.1                                                                                                                                                                                                          | XM_006438636.1,<br>XM_006483086.1                                                                                | Cclementi_03,<br>Csinensis_02 |
| Citrus_03             | DC898757.1                                                                                                                                                                                                                                     | XM_006431668.1,<br>XM_006494311.1                                                                                | Cclementi_04,<br>Cclementi_06 |
| Citrus_04             | CB292631.1, CB292632.1,<br>CF417379.1, CF653378.1,<br>CF838055.1, CK936770.1,<br>CV715706.1, CX289736.1,<br>CX289755.1, CX293658.1,<br>DY259885.1, EY656016.1,<br>EY834284.1, EY840262.1,<br>EY840708.1, EY840891.1,<br>EY841218.1, FC927211.1 | FJ917371.1,<br>GU120096.1,<br>GU220071.1,<br>GU220072.1,<br>XM_006447854.1,<br>XM_006447855.1,<br>XM_006469304.1 | -                             |
| Cleome_hassleriana_01 | -                                                                                                                                                                                                                                              | -                                                                                                                | Chassleri_01                  |
| Cleome_01             | GR933379.1                                                                                                                                                                                                                                     | -                                                                                                                | Chassleri_03                  |
| Cleome_02             | GR935235.1                                                                                                                                                                                                                                     | -                                                                                                                | Chassleri_02                  |
| Coffea_canephora_01   | -                                                                                                                                                                                                                                              | FN547910.1                                                                                                       | -                             |
| Coffea_canephora_02   | -                                                                                                                                                                                                                                              | FN547914.1                                                                                                       | -                             |
| Coffea_canephora_03   | -                                                                                                                                                                                                                                              | FN547915.1                                                                                                       | -                             |
| Coffea_canephora_04   | DV671894.1, DV675591.1,<br>DV676616.1, DV680291.1,<br>DV683019.1, DV683253.1,<br>DV683890.1, DV711148.1,<br>EE197299.1, EE199203.1                                                                                                             | -                                                                                                                | -                             |
| Coffea_canephora_05   | DV663954.1, DV677885.1,<br>DV679833.1, DV691178.1,<br>DV691510.1, EE193267.1,<br>GT652885.1                                                                                                                                                    | -                                                                                                                | -                             |

| Tip Name                | EST                                                                                                                                               | NT                                | Genomic                  |
|-------------------------|---------------------------------------------------------------------------------------------------------------------------------------------------|-----------------------------------|--------------------------|
| Coffea_canephora_06     | -                                                                                                                                                 | FN547912.1,<br>FN547913.1         | -                        |
| Coffea_canephora_07     | -                                                                                                                                                 | FN547911.1                        | -                        |
| Coffea_canephora_08     | -                                                                                                                                                 | FN547919.1                        | -                        |
| Cryptomeria_japonica_01 | BW994478.1, BW997145.1,<br>BY888545.1, BY889589.1,<br>BY901048.1                                                                                  | -                                 | -                        |
| Cryptomeria_japonica_02 | BY881078.1, BY893346.1,<br>BY899680.1, BY910815.1                                                                                                 | -                                 | -                        |
| Cucumis_melo_01         | -                                                                                                                                                 | -                                 | Cmelo_10                 |
| Cucumis_melo_02         | AM715481.2, AM716051.2,<br>AM720647.2, AM729864.1                                                                                                 | -                                 | Cmelo_06                 |
| Cucumis_melo_03         | AM714647.2, AM723622.2,<br>AM724941.2, AM725433.2,<br>AM725949.2, AM728018.2,<br>AM730911.2, AM734040.2,<br>AM737077.2, JG499862.1                | -                                 | Cmelo_07                 |
| Cucumis_melo_04         | JG508853.1, JG516100.1                                                                                                                            | -                                 | Cmelo_11                 |
| Cucumis_sativus_01      | -                                                                                                                                                 | XM_004148648.1,<br>XM_004170212.1 | Csativus_03              |
| Cucumis_sativus_02      | -                                                                                                                                                 | XM_004135406.1,<br>XM_004155338.1 | Csativus_05              |
| Cucumis_sativus_03      | -                                                                                                                                                 | XM_004135127.1                    | Csativus_04              |
| Cucumis_sativus_04      | -                                                                                                                                                 | XM_004137114.1                    | Csativus_10              |
| Cucumis_sativus_05      | -                                                                                                                                                 | XM_004137939.1                    | Csativus_02              |
| Cucumis_sativus_06      | -                                                                                                                                                 | XM_004147451.1                    | Csativus_07              |
| Cucumis_sativus_07      | -                                                                                                                                                 | XM_004173295.1                    | Csativus_06              |
| Cucumis_sativus_08      | -                                                                                                                                                 | XM_004147449.1,<br>XM_004159596.1 | Csativus_08              |
| Cucumis_01              | AM714094.1, AM715895.1,<br>AM720546.2, AM721089.1,<br>AM721148.2, AM722721.2,<br>AM735731.2, DV632833.1,<br>JG470782.1, JG478941.1,<br>JG492397.1 | XM_004148894.1,<br>XM_004161486.1 | Cmelo_08,<br>Csativus_09 |
| Cycas_rumphii_01        | EX926848.1                                                                                                                                        | -                                 | -                        |
| Cynara_cardunculus_01   | GE588088.1                                                                                                                                        | -                                 | -                        |
| Cynara_cardunculus_02   | GE612095.1                                                                                                                                        | -                                 | -                        |
| Cynara_cardunculus_03   | GE588043.1, GE589119.1,<br>GE592853.1, GE596396.1,<br>GE596990.1, GE600718.1                                                                      | -                                 | -                        |
| Cynodon_dactylon_01     | ES295830.1                                                                                                                                        | -                                 | -                        |
| Cynodon_dactylon_02     | ES300140.1                                                                                                                                        | -                                 | -                        |



| Tip Name                 | EST                                                                                                                                                                                                                                                           | NT                        | Genomic                       |
|--------------------------|---------------------------------------------------------------------------------------------------------------------------------------------------------------------------------------------------------------------------------------------------------------|---------------------------|-------------------------------|
| Dactylis_glomerata_01    | HO124290.1, HO149943.1,<br>HO151735.1, HO158445.1,<br>HO158527.1, HO159350.1,<br>HO159616.1, HO159739.1,<br>HO161598.1, HO161826.1,<br>HO161958.1, HO162183.1,<br>HO167622.1, HO168790.1,<br>HO169123.1, HO169833.1,<br>HO173685.1, HO179214.1,<br>HO180515.1 | -                         | -                             |
| Dactylis_glomerata_02    | HO128658.1, HO128867.1,<br>HO179637.1, HO179642.1                                                                                                                                                                                                             | -                         | -                             |
| Dactylis_glomerata_03    | HO139456.1, HO139912.1                                                                                                                                                                                                                                        | -                         | -                             |
| Daucus_carota_01         | JG754867.1                                                                                                                                                                                                                                                    | -                         | -                             |
| Dendrobium_nobile_01     | HO190249.1, HO190276.1,<br>HO190501.1, HO191489.1,<br>HO191691.1, HO199220.1                                                                                                                                                                                  | -                         | -                             |
| Dianthus_caryophyllus_01 | -                                                                                                                                                                                                                                                             | -                         | Dcaryophy_01                  |
| Dianthus_caryophyllus_02 | -                                                                                                                                                                                                                                                             | -                         | Dcaryophy_03                  |
| Dianthus_caryophyllus_03 | -                                                                                                                                                                                                                                                             | -                         | Dcaryophy_06                  |
| Dianthus_caryophyllus_04 | FY395220.1, FY397286.1                                                                                                                                                                                                                                        | -                         | Dcaryophy_09                  |
| Dionaea_muscipula_01     | -                                                                                                                                                                                                                                                             | AB481098.1                | -                             |
| Dioscorea_alata_01       | HO852386.1                                                                                                                                                                                                                                                    | -                         | -                             |
| Dioscorea_alata_02       | HO826052.1, HO852738.1                                                                                                                                                                                                                                        | -                         | -                             |
| Drosera_adelae_01        | -                                                                                                                                                                                                                                                             | AB211503.1,<br>AB231461.1 | -                             |
| Elaeis_guineensis_01     | -                                                                                                                                                                                                                                                             | -                         | Eguineens_05                  |
| Elaeis_oleifera_01       | -                                                                                                                                                                                                                                                             | -                         | Eoleifera_02                  |
| Elaeis_01                | -                                                                                                                                                                                                                                                             | -                         | Eguineens_03,<br>Eoleifera_01 |
| Elaeis_02                | DW248263.1, DW248694.1,<br>EL608801.1, EL681934.1,<br>EL681991.1, EL685224.1,<br>EL690419.1, EL694516.1,<br>EL694517.1, EL695346.1                                                                                                                            | AY548534.1                | -                             |
| Elaeis_03                | -                                                                                                                                                                                                                                                             | -                         | Eguineens_01,<br>Eoleifera_04 |
| Elymus_spicatus_01       | FF342552.1, FF343227.1,<br>FF357550.1                                                                                                                                                                                                                         | -                         | -                             |
| Elymus_spicatus_02       | FF342766.1, FF342767.1,<br>FF352931.1, FF352932.1                                                                                                                                                                                                             | -                         | -                             |

| Tip Name                    | EST                                                                                                                                                                                                                                                                                                                                            | NT                        | Genomic                      |
|-----------------------------|------------------------------------------------------------------------------------------------------------------------------------------------------------------------------------------------------------------------------------------------------------------------------------------------------------------------------------------------|---------------------------|------------------------------|
| Elymus_spicatus_03          | FF340156.1, FF340261.1,<br>FF340352.1, FF340416.1,<br>FF340538.1, FF341204.1,<br>FF342502.1, FF342503.1,<br>FF344090.1, FF345278.1,<br>FF347568.1, FF347762.1,<br>FF349322.1, FF349718.1,<br>FF350519.1, FF350834.1,<br>FF354960.1, FF355464.1,<br>FF355989.1, FF356914.1,<br>FF357950.1, FF359620.1,<br>FF362662.1, FF362934.1,<br>FF363963.1 | -                         | -                            |
| Ensete_ventricosum_01       | -                                                                                                                                                                                                                                                                                                                                              | -                         | Eventrico_01                 |
| Ephedra_distachya_01        | JG720844.1                                                                                                                                                                                                                                                                                                                                     | -                         | -                            |
| Eriobotrya_japonica_01      | -                                                                                                                                                                                                                                                                                                                                              | EU442286.1,<br>GU384665.1 | -                            |
| Eriobotrya_japonica_02      | -                                                                                                                                                                                                                                                                                                                                              | EU442288.1,<br>GQ202269.4 | -                            |
| Eriobotrya_japonica_03      | -                                                                                                                                                                                                                                                                                                                                              | EU442287.1,<br>GU384666.1 | -                            |
| Eriobotrya_japonica_04      | -                                                                                                                                                                                                                                                                                                                                              | EU442285.1                | -                            |
| Eriobotrya_japonica_05      | -                                                                                                                                                                                                                                                                                                                                              | EU442289.1,<br>GU384667.1 | -                            |
| Eschscholzia_californica_01 | CK752708.1, JG613014.1,<br>JG614524.1                                                                                                                                                                                                                                                                                                          | -                         | -                            |
| Eucalyptus_grandis_01       | HS044775.1, HS064787.1,<br>HS068111.1                                                                                                                                                                                                                                                                                                          | -                         | Egrandis_03                  |
| Eucalyptus_01               | -                                                                                                                                                                                                                                                                                                                                              | -                         | Ecamaldul_01,<br>Egrandis_01 |
| Eucommia_ulmoides_01        | FY902195.1, FY907790.1                                                                                                                                                                                                                                                                                                                         | -                         | -                            |
| Eucommia_ulmoides_02        | FY897552.1, FY897614.1,<br>FY904512.1, FY906691.1,<br>FY908375.1, FY914839.1,<br>FY915319.1, FY915477.1,<br>FY915600.1, FY916245.1,<br>FY918470.1, FY918480.1,<br>FY920243.1, FY923987.1                                                                                                                                                       | -                         | -                            |
| Eucommia_ulmoides_03        | FY908258.1, FY917770.1,<br>FY922170.1                                                                                                                                                                                                                                                                                                          | -                         | -                            |
| Euonymus_alatus_01          | HS006241.1, HS251463.1                                                                                                                                                                                                                                                                                                                         | -                         | -                            |
| Euphorbia_esula_01          | DV120817.1, DV121487.1,<br>DV122232.1                                                                                                                                                                                                                                                                                                          | -                         | -                            |

| Tip Name               | EST                                                                          | NT                                       | Genomic                                                               |
|------------------------|------------------------------------------------------------------------------|------------------------------------------|-----------------------------------------------------------------------|
| Euphorbia_esula_02     | DV115613.1, DV117038.1,<br>DV118409.1, DV140278.1,<br>DV140780.1, DV144557.1 | -                                        | -                                                                     |
| Euphorbia_esula_03     | DV115838.1, DV117206.1,<br>DV118588.1                                        | -                                        | -                                                                     |
| Eutrema_salsugineum_01 | -                                                                            | XM_006395681.1                           | Esalsugin_05                                                          |
| Eutrema_salsugineum_02 | -                                                                            | XM_006415904.1                           | Esalsugin_02                                                          |
| Eutrema_salsugineum_03 | -                                                                            | XM_006416977.1,<br>XM_006416978.1        | Esalsugin_04                                                          |
| Eutrema_01             | BY801883.1, BY801884.1,<br>BY829958.1                                        | XM_006414924.1                           | Esalsugin_01                                                          |
| Fagopyrum_01           | -                                                                            | AB232934.1,<br>AB232935.1,<br>AB232936.1 | -                                                                     |
| Festuca_arundinacea_01 | DT710046.1, DT712402.1,<br>DT712730.1, DT713107.1                            | -                                        | -                                                                     |
| Festuca_arundinacea_02 | DT689815.1, DT690074.1,<br>DT690158.1, DT690338.1                            | -                                        | -                                                                     |
| Fragaria_01            | -                                                                            | XM_004297250.1                           | Fiinumae_04,<br>Fnipponic_05,<br>Fnubicola_05,<br>Fx_09               |
| Fragaria_02            | -                                                                            | XM_004297251.1                           | Fiinumae_02,<br>Fnipponic_06,<br>Foriental_04                         |
| Fragaria_03            | -                                                                            | XM_004301714.1                           | Fiinumae_06,<br>Fvesca_03,<br>Fx_08                                   |
| Fragaria_04            | DV440585.1                                                                   | XM_004304857.1                           | Fiinumae_03,<br>Fvesca_05                                             |
| Fragaria_05            | EX665664.1, EX665717.1,<br>EX665831.1, EX668189.1,<br>EX670882.1             | XM_004290057.1                           | Fiinumae_01,<br>Fnipponic_08,<br>Fnubicola_04,<br>Fvesca_02,<br>Fx_10 |
| Fragaria_06            | -                                                                            | XM_004287659.1                           | Fnubicola_07,<br>Fvesca_01                                            |
| Fraxinus_excelsior_01  | -                                                                            | -                                        | Fexcelsio_01                                                          |
| Fumaria_officinalis_01 | JG658550.1                                                                   | -                                        | -                                                                     |
| Ginkgo_biloba_01       | EX932034.1                                                                   | -                                        | -                                                                     |
| Glycine_max_01         | -                                                                            | XM_006577007.1                           | Gmax_10                                                               |
| Glycine_max_02         | EV278085.1, EV281800.1,<br>FK015688.1                                        | NM_001250157.1                           | Gmax_18                                                               |

| Tip Name                | EST                                                                                                                                                                                                                                                                                                                                                        | NT                                                                  | Genomic                         |
|-------------------------|------------------------------------------------------------------------------------------------------------------------------------------------------------------------------------------------------------------------------------------------------------------------------------------------------------------------------------------------------------|---------------------------------------------------------------------|---------------------------------|
| Glycine_max_03          | BE609956.1, BU544321.1                                                                                                                                                                                                                                                                                                                                     | XM_003518684.2                                                      | Gmax_08                         |
| Glycine_max_04          | BI972582.1, BW661627.1,<br>CX549006.1, CX711401.1,<br>EV265984.1, FG988411.1,<br>FG994523.1, FG994524.1,<br>FK001242.1, GR850906.1,<br>GR850907.1, GR851647.1,<br>GR851648.1, HO017288.1                                                                                                                                                                   | AK245022.1,<br>NM_001248254.1,<br>XM_003517942.2                    | Gmax_02,<br>Gmax_09             |
| Glycine_max_05          | -                                                                                                                                                                                                                                                                                                                                                          | XM_003517941.2                                                      | Gmax_01                         |
| Glycine_max_06          | -                                                                                                                                                                                                                                                                                                                                                          | XM_003519879.2,<br>XM_003547972.1                                   | Gmax_05                         |
| Glycine_max_07          | BF325375.1, EV264023.1,<br>EV267427.1, EV270351.1,<br>EV274635.1, FG991005.1                                                                                                                                                                                                                                                                               | NM_001251520.1                                                      | Gmax_17                         |
| Glycine_01              | AI416638.1, BE020073.1,<br>BE191140.1, BE611605.1,<br>BG510292.1, BG726388.1,<br>BG882209.1, BI469866.1,<br>BI787850.1, BQ628757.1,<br>BQ742455.1, BU090131.1,<br>BU091537.1, BW652661.1,<br>BW669587.1, CA799030.1,<br>CA801284.1, DB960292.1,<br>EV272077.1, EV278099.1,<br>FK008542.1, FK008543.1,<br>GR826078.1, GR845837.1,<br>HO016466.1, HO019657.1 | AK245443.1,<br>XM_003528758.2,<br>XM_003548506.2                    | Gmax_13                         |
| Glycine_02              | BG156052.1, BI425210.1,<br>BI470540.1, BM520744.1,<br>BM523270.1, BM523369.1,<br>BM526581.1, BM526584.1,<br>BQ612399.1, BU081349.1,<br>CA852912.1, EV279232.1,<br>EV279385.1, EV281645.1,<br>EV282053.1, EV282744.1,<br>FK017953.1, FK024571.1,<br>FK024572.1, HO212305.1                                                                                  | BT099269.1,<br>NM_001248243.1,<br>XM_003518068.2,<br>XM_003518071.2 | Gmax_04,<br>Gmax_06,<br>Gmax_07 |
| Gossypium_arboreum_01   | -                                                                                                                                                                                                                                                                                                                                                          | -                                                                   | Garboreum_04                    |
| Gossypium_arboreum_02   | -                                                                                                                                                                                                                                                                                                                                                          | -                                                                   | Garboreum_10,<br>Garboreum_11   |
| Gossypium_raitmondii_01 | -                                                                                                                                                                                                                                                                                                                                                          | -                                                                   | Graitmondi_08                   |
| Gossypium_raitmondii_02 | -                                                                                                                                                                                                                                                                                                                                                          | -                                                                   | Graitmondi_17                   |

| Tip Name               | EST                                                                                                                                                                                                                                                                                                                                                                                                                                                                    | NT | Genomic                       |
|------------------------|------------------------------------------------------------------------------------------------------------------------------------------------------------------------------------------------------------------------------------------------------------------------------------------------------------------------------------------------------------------------------------------------------------------------------------------------------------------------|----|-------------------------------|
| Gossypium_01           | DR452451.1, DT545608.1,<br>DT545724.1, DT545780.1,<br>DT545791.1, DW505462.1                                                                                                                                                                                                                                                                                                                                                                                           | -  | Garboreum_07,<br>Graimondi_02 |
| Gossypium_02           | DR462086.1, DW500330.1,<br>DW500331.1                                                                                                                                                                                                                                                                                                                                                                                                                                  | -  | Garboreum_08,<br>Graimondi_04 |
| Gossypium_03           | AI729386.1, AI729649.1,<br>BM359116.1, BQ405390.1,<br>CO099187.1, CO105024.1,<br>CO112780.1, CO112781.1,<br>DR458181.1, DT552848.1,<br>DT557061.1, DT558244.1,<br>DT562773.1, DT563576.1,<br>DT574569.1, DW224232.1,<br>DW224741.1, DW511786.1,<br>DW516456.1, ES793056.1,<br>ES799270.1, ES799914.1,<br>ES826089.1, ES846751.1,<br>EV490351.1, EV490379.1,<br>EV492392.1, EV495145.1,<br>EV496829.1, HO091693.1,<br>JG842523.1, JG843027.1,<br>JG847864.1, JK801605.1 | -  | Garboreum_06,<br>Graimondi_01 |
| Gossypium_04           | -                                                                                                                                                                                                                                                                                                                                                                                                                                                                      | -  | Garboreum_09,<br>Graimondi_03 |
| Gossypium_05           | DT463266.1, DT463267.1,<br>ES815921.1, GR926562.1,<br>GR926656.1, GR929575.1,<br>GR929579.1, HO096514.1,<br>HO105898.1, HO109133.1                                                                                                                                                                                                                                                                                                                                     | -  | Graimondi_05                  |
| Gossypium_06           | -                                                                                                                                                                                                                                                                                                                                                                                                                                                                      | -  | Garboreum_05,<br>Graimondi_19 |
| Grimmia_pilifera_01    | GR307381.1, GR307673.1                                                                                                                                                                                                                                                                                                                                                                                                                                                 | -  | -                             |
| Guizotia_abyssinica_01 | GE564326.1, GE569344.1                                                                                                                                                                                                                                                                                                                                                                                                                                                 | -  | -                             |
| Helianthus_01          | EE638765.1, EE639184.1,<br>EE643073.1, EE650763.1,<br>EL459416.1                                                                                                                                                                                                                                                                                                                                                                                                       | -  | -                             |
| Helianthus_02          | DY953463.1, GE517775.1                                                                                                                                                                                                                                                                                                                                                                                                                                                 | -  | -                             |

| Tip Name      | EST                                                                                                                                                                                                                                                                                                                                                                                                                                                                                                                                                                                                                                                                                                                                                                                                                                                                                                                                                                                                                                                                                                                                                           | NT | Genomic |
|---------------|---------------------------------------------------------------------------------------------------------------------------------------------------------------------------------------------------------------------------------------------------------------------------------------------------------------------------------------------------------------------------------------------------------------------------------------------------------------------------------------------------------------------------------------------------------------------------------------------------------------------------------------------------------------------------------------------------------------------------------------------------------------------------------------------------------------------------------------------------------------------------------------------------------------------------------------------------------------------------------------------------------------------------------------------------------------------------------------------------------------------------------------------------------------|----|---------|
| Helianthus_03 | DY905680.1, DY906289.1,<br>DY909029.1, DY909046.1,<br>DY911865.1, DY914640.1,<br>DY914727.1, DY914914.1,<br>DY915628.1, DY915879.1,<br>DY916036.1, DY916836.1,<br>DY917049.1, DY917809.1,<br>DY920355.1, DY922049.1,<br>DY922811.1, DY923179.1,<br>DY923304.1, DY937190.1,<br>DY940122.1, DY940421.1,<br>DY941964.1, DY942592.1,<br>DY942695.1, DY942890.1,<br>DY943192.1, DY943319.1,<br>DY943345.1, DY943457.1,<br>DY943611.1, DY944871.1,<br>DY944915.1, DY945230.1,<br>DY945268.1, DY945493.1,<br>DY945727.1, DY945798.1,<br>DY945945.1, DY945983.1,<br>DY946033.1, DY946127.1,<br>DY946639.1, DY947208.1,<br>DY947209.1, DY947402.1,<br>DY947543.1, DY948326.1,<br>DY948866.1, DY949250.1,<br>DY949412.1, DY949572.1,<br>DY949696.1, DY949753.1,<br>DY950115.1, DY950132.1,<br>DY950188.1, DY950725.1,<br>DY950748.1, DY951502.1,<br>DY951593.1, DY951917.1,<br>DY951964.1, DY952133.1,<br>DY952398.1, DY952876.1,<br>DY953201.1, DY953277.1,<br>EE610720.1, EE613962.1,<br>EE620497.1, EL427482.1,<br>EL428306.1, EL432766.1,<br>EL435265.1, EL440723.1,<br>EL463845.1, EL464359.1,<br>EL464453.1, EL465319.1,<br>EL470296.1, EL471271.1,<br>GE506734.1 | -  | -       |

| Tip Name              | EST                                                                                                                                                                                                                                                                                                                             | NT                                       | Genomic      |
|-----------------------|---------------------------------------------------------------------------------------------------------------------------------------------------------------------------------------------------------------------------------------------------------------------------------------------------------------------------------|------------------------------------------|--------------|
| Helianthus_04         | DY911059.1, DY915241.1,<br>DY917269.1, DY920159.1,<br>DY921847.1, DY924062.1,<br>DY925079.1, DY942884.1,<br>DY944462.1, DY949620.1,<br>EL412580.1, EL425553.1,<br>EL427543.1, EL428233.1,<br>EL434588.1, EL447387.1,<br>EL460997.1, EL461428.1,<br>EL461551.1, EL466382.1,<br>EL487616.1, EL513003.1,<br>EL513130.1, EL513233.1 | -                                        | -            |
| Helianthus_05         | DY914656.1, DY914842.1,<br>DY917823.1, DY920334.1,<br>DY943979.1, DY945420.1,<br>EE608813.1, EE623589.1,<br>EE650068.1, EL428038.1,<br>EL460101.1, EL462197.1,<br>EL488096.1, EL513859.1,<br>GE518687.1, GE518688.1,<br>GE518767.1, GE518768.1,<br>GE519329.1                                                                   | -                                        | -            |
| Helianthus_06         | DY922217.1, DY945231.1,<br>DY953056.1, DY953259.1,<br>EE621342.1                                                                                                                                                                                                                                                                | -                                        | -            |
| Helianthus_07         | BQ914410.1, DY917820.1,<br>DY921407.1, DY923716.1,<br>DY944864.1, DY946241.1,<br>EE642837.1, EE646434.1,<br>EE656059.1, EL484816.1,<br>GE500598.1                                                                                                                                                                               | -                                        | -            |
| Hevea_brasiliensis_01 | -                                                                                                                                                                                                                                                                                                                               | -                                        | Hbrasilie_24 |
| Hordeum_pubiflorum_01 | -                                                                                                                                                                                                                                                                                                                               | -                                        | Hpubiflor_06 |
| Hordeum_pubiflorum_02 | -                                                                                                                                                                                                                                                                                                                               | -                                        | Hpubiflor_07 |
| Hordeum_vulgare_01    | AL506966.1, BE422325.1,<br>BG368983.1, BJ479061.1,<br>BY846022.1, BY846428.1,<br>DK587721.1, DK605033.1,<br>DK612942.1, DK618077.1,<br>DK620621.1, DK623310.1,<br>DK624080.1, DK625545.1,<br>DK626587.1, DK638568.1,<br>DK647671.1, DK659886.1,<br>DK687025.1, DK722767.1                                                       | AK354480.1,<br>AK362017.1,<br>AK364745.1 | -            |

| Tip Name           | EST                                                                                                                                                                                                                                                                                                                                                                                                                                                                                                                                                                                                                                                                                                                       | NT                                       | Genomic                      |
|--------------------|---------------------------------------------------------------------------------------------------------------------------------------------------------------------------------------------------------------------------------------------------------------------------------------------------------------------------------------------------------------------------------------------------------------------------------------------------------------------------------------------------------------------------------------------------------------------------------------------------------------------------------------------------------------------------------------------------------------------------|------------------------------------------|------------------------------|
| Hordeum_vulgare_02 | -                                                                                                                                                                                                                                                                                                                                                                                                                                                                                                                                                                                                                                                                                                                         | -                                        | Hvulgare_03                  |
| Hordeum_vulgare_03 | -                                                                                                                                                                                                                                                                                                                                                                                                                                                                                                                                                                                                                                                                                                                         | -                                        | Hvulgare_04                  |
| Hordeum_vulgare_04 | BE601973.2, BF623030.2,<br>BF625343.2                                                                                                                                                                                                                                                                                                                                                                                                                                                                                                                                                                                                                                                                                     | AK250005.1,<br>AK252681.1,<br>AY120886.1 | -                            |
| Hordeum_01         | DK802410.1                                                                                                                                                                                                                                                                                                                                                                                                                                                                                                                                                                                                                                                                                                                | AK365286.1                               | Hpubiflor_05,<br>Hvulgare_09 |
| Hordeum_02         | BI949346.1, BM816162.1,<br>BM816163.1, BQ740129.1,<br>DK587671.1, DK601711.1,<br>DK605632.1, DK613176.1,<br>DK666066.1, DK717260.1,<br>DK721335.1, DK769714.1,<br>DK866239.1, GH224721.1                                                                                                                                                                                                                                                                                                                                                                                                                                                                                                                                  | AF000940.1,<br>AK368782.1                | Hpubiflor_09,<br>Hvulgare_12 |
| Hordeum_03         | -                                                                                                                                                                                                                                                                                                                                                                                                                                                                                                                                                                                                                                                                                                                         | AF182197.1,<br>AK250669.1                | Hpubiflor_02,<br>Hvulgare_05 |
| Hordeum_04         | AJ433177.1, AJ464321.1,<br>AL504955.1, AL505169.1,<br>AL505254.1, AV914669.1,<br>AV932837.1, AV932845.1,<br>AV933847.1, AV933848.1,<br>AV935472.1, AV936080.1,<br>AV941745.1, BE060118.2,<br>BF253875.2, BF254391.2,<br>BF255157.2, BF255271.2,<br>BF255408.2, BF618612.2,<br>BG343116.2, BI779336.2,<br>BJ544303.1, BJ544602.1,<br>BJ545766.1, BJ546077.1,<br>BJ547671.1, BJ547993.1,<br>BM099203.2, BM373545.2,<br>BQ462174.1, BQ766723.1,<br>BQ767126.1, BU968813.1,<br>BY846554.1, BY847038.1,<br>CA020561.1, CA021585.1,<br>CA027459.1, CB883496.1,<br>CD054807.1, CK125917.1,<br>CK567638.1, DK587056.1,<br>DK611253.1, DK614427.1,<br>DK640936.1, DK770817.1,<br>DK793051.1, FD518947.1,<br>GH218544.1, GH218545.1 | AF000939.1,<br>AK251876.1                | Hpubiflor_04,<br>Hvulgare_06 |



| Tip Name                    | EST                                                                                                                                                                                                                                | NT                                 | Genomic                   |
|-----------------------------|------------------------------------------------------------------------------------------------------------------------------------------------------------------------------------------------------------------------------------|------------------------------------|---------------------------|
| Hordeum_05                  | BF627174.2, BG343833.1, BI960324.1, BU998770.1, BY842839.1, BY849333.1, CA024441.1, CB869630.1, DK586850.1, DK593386.1, DK593516.1, DK597625.1, DK624337.1, DK632743.1, DK647049.1, DK647566.1, DK739959.1, DK741352.1, DK743765.1 | AK354377.1, AK355768.1, AK364534.1 | Hpubiflor_01, Hvulgare_10 |
| Humulus_lupulus_01          | EX515510.1, GD249872.1, GD250704.1                                                                                                                                                                                                 | -                                  | -                         |
| Humulus_lupulus_02          | EX517546.1, EX520643.1                                                                                                                                                                                                             | -                                  | -                         |
| Huperzia_serrata_01         | GO248796.1, GO248859.1, GO912362.1, GO914242.1                                                                                                                                                                                     | -                                  | -                         |
| Ipomoea_batatas_01          | EE875665.1                                                                                                                                                                                                                         | -                                  | -                         |
| Ipomoea_batatas_02          | EE882831.1, EE883036.1, EE883141.1                                                                                                                                                                                                 | -                                  | -                         |
| Ipomoea_batatas_03          | EE876702.1, JG697716.1, JG697814.1, JG697924.1, JG698021.1, JG698103.1                                                                                                                                                             | -                                  | -                         |
| Ipomoea_batatas_04          | EE877251.1, EE877662.1                                                                                                                                                                                                             | -                                  | -                         |
| Ipomoea_nil_01              | CJ754416.1                                                                                                                                                                                                                         | -                                  | -                         |
| Ipomoea_nil_02              | BJ560140.1, BJ568552.1, CJ743080.1, CJ746892.1, CJ749639.1, CJ750833.1, CJ756606.1                                                                                                                                                 | -                                  | -                         |
| Ipomoea_nil_03              | BJ556286.1, BJ572130.1                                                                                                                                                                                                             | -                                  | -                         |
| Ipomopsis_aggregata_01      | DT575316.1                                                                                                                                                                                                                         | -                                  | -                         |
| Iris_fulva_01               | EX954717.1, EX955804.1, EX955993.1                                                                                                                                                                                                 | -                                  | -                         |
| Jatropha_curcas_01          | GT978984.1, GT980119.1                                                                                                                                                                                                             | -                                  | Jcurcas_01                |
| Jatropha_curcas_02          | -                                                                                                                                                                                                                                  | -                                  | Jcurcas_02                |
| Jatropha_curcas_03          | GT978644.1, GW616373.1, GW877769.1                                                                                                                                                                                                 | -                                  | Jcurcas_03                |
| Krascheninnikovia_lanata_01 | HS587315.1                                                                                                                                                                                                                         | -                                  | -                         |
| Lactuca_sativa_01           | -                                                                                                                                                                                                                                  | -                                  | Lsativa_03                |
| Lactuca_sativa_02           | -                                                                                                                                                                                                                                  | -                                  | Lsativa_04                |

| Tip Name                   | EST                                                                                                                                                                                                     | NT | Genomic      |
|----------------------------|---------------------------------------------------------------------------------------------------------------------------------------------------------------------------------------------------------|----|--------------|
| Lactuca_01                 | BQ848018.1, BQ856204.1,<br>BQ857299.1, DW056114.1,<br>DW062454.1, DW062929.1,<br>DW096090.1, DW097057.1,<br>DW097430.1, DW125237.1,<br>DY977363.1, DY977411.1,<br>DY979305.1, DY979479.1,<br>DY984956.1 | -  | -            |
| Lactuca_02                 | DW084365.1, DW084652.1                                                                                                                                                                                  | -  | Lsativa_05   |
| Lactuca_03                 | BQ991918.1, DW110112.1,<br>DW124816.1, DW145116.1,<br>DW150085.1, DW156183.1,<br>DW157791.1, DW165257.1,<br>DY983286.1                                                                                  | -  | -            |
| Lagenaria_siceraria_01     | -                                                                                                                                                                                                       | -  | Lsicerari_12 |
| Lathyrus_odoratus_01       | GO315198.1, GO316275.1,<br>GO317387.1, GO318179.1,<br>GO318300.1, GO318683.1,<br>GO319469.1, GO320798.1,<br>GO321081.1, GO322355.1,<br>GO322431.1                                                       | -  | -            |
| Leavenworthia_alabamica_01 | -                                                                                                                                                                                                       | -  | Lalabamic_01 |
| Leavenworthia_alabamica_02 | -                                                                                                                                                                                                       | -  | Lalabamic_02 |
| Leavenworthia_alabamica_03 | -                                                                                                                                                                                                       | -  | Lalabamic_03 |
| Leavenworthia_alabamica_04 | -                                                                                                                                                                                                       | -  | Lalabamic_04 |
| Leavenworthia_alabamica_05 | -                                                                                                                                                                                                       | -  | Lalabamic_06 |
| Leersia_perrieri_01        | -                                                                                                                                                                                                       | -  | Lperrieri_02 |
| Leersia_perrieri_02        | -                                                                                                                                                                                                       | -  | Lperrieri_03 |
| Leersia_perrieri_03        | -                                                                                                                                                                                                       | -  | Lperrieri_04 |
| Leersia_perrieri_04        | -                                                                                                                                                                                                       | -  | Lperrieri_06 |
| Leersia_perrieri_05        | -                                                                                                                                                                                                       | -  | Lperrieri_07 |
| Leersia_perrieri_06        | -                                                                                                                                                                                                       | -  | Lperrieri_08 |
| Leersia_perrieri_07        | -                                                                                                                                                                                                       | -  | Lperrieri_09 |
| Limnanthes_alba_01         | FD654739.1                                                                                                                                                                                              | -  | -            |
| Linum_usitatissimum_01     | JG218276.1, JG250847.1                                                                                                                                                                                  | -  | Lusitatis_02 |
| Linum_usitatissimum_02     | -                                                                                                                                                                                                       | -  | Lusitatis_01 |
| Linum_usitatissimum_03     | -                                                                                                                                                                                                       | -  | Lusitatis_03 |
| Liriodendron_tulipifera_01 | FD495669.1                                                                                                                                                                                              | -  | -            |
| Liriodendron_tulipifera_02 | DT584387.1, FD491845.1,<br>FD493328.1, FD495379.1,<br>FD495878.1                                                                                                                                        | -  | -            |

| Tip Name                   | EST                                                                                                                                                                                                                                | NT                        | Genomic      |
|----------------------------|------------------------------------------------------------------------------------------------------------------------------------------------------------------------------------------------------------------------------------|---------------------------|--------------|
| Liriodendron_tulipifera_03 | DT582846.1, DT596269.1,<br>FD492742.1, FD493759.1,<br>FD494098.1, FD495069.1,<br>FD497605.1, FD497720.1,<br>FD498480.1, FD501848.1                                                                                                 | -                         | -            |
| Lotus_japonicus_01         | GO022452.1, GO028056.1                                                                                                                                                                                                             | BT137426.1,<br>BT148442.1 | -            |
| Lotus_japonicus_02         | FS318593.1, FS320654.1,<br>FS321695.1, FS326312.1,<br>FS327292.1, FS333298.1,<br>FS334339.1, FS335812.1,<br>FS345534.1, FS345821.1,<br>FS347352.1, FS348267.1,<br>FS352646.1, FS353627.1,<br>FS359827.1, FS362292.1,<br>GO009251.1 | -                         | -            |
| Lotus_japonicus_03         | BI419984.1, BI420700.1,<br>BP041087.1, BW595750.1,<br>CB828705.1, DC595428.1,<br>FS336467.1, GO031730.1,<br>GO032406.1, GO038501.1                                                                                                 | BT135211.1,<br>BT142812.1 | -            |
| Lotus_japonicus_04         | GO024523.1                                                                                                                                                                                                                         | BT141961.1                | -            |
| Luffa_aegyptiaca_01        | -                                                                                                                                                                                                                                  | D64011.1                  | -            |
| Luffa_aegyptiaca_02        | -                                                                                                                                                                                                                                  | D64012.1                  | -            |
| Lupinus_angustifolius_01   | -                                                                                                                                                                                                                                  | -                         | Langustif_01 |
| Lupinus_angustifolius_02   | -                                                                                                                                                                                                                                  | -                         | Langustif_02 |
| Lupinus_angustifolius_03   | -                                                                                                                                                                                                                                  | -                         | Langustif_04 |
| Lupinus_angustifolius_04   | -                                                                                                                                                                                                                                  | -                         | Langustif_05 |
| Lupinus_angustifolius_05   | -                                                                                                                                                                                                                                  | -                         | Langustif_06 |
| Lupinus_angustifolius_06   | -                                                                                                                                                                                                                                  | -                         | Langustif_08 |
| Malus_angustifolia_01      | -                                                                                                                                                                                                                                  | FJ535239.1                | -            |
| Malus_domestica_01         | -                                                                                                                                                                                                                                  | -                         | Mdomestic_05 |
| Malus_domestica_02         | -                                                                                                                                                                                                                                  | -                         | Mdomestic_07 |
| Malus_domestica_03         | -                                                                                                                                                                                                                                  | -                         | Mdomestic_18 |
| Malus_kansuensis_01        | -                                                                                                                                                                                                                                  | FJ535242.1                | -            |
| Malus_sieversii_01         | -                                                                                                                                                                                                                                  | AB540121.1                | -            |
| Malus_spectabilis_01       | -                                                                                                                                                                                                                                  | FJ943266.1                | -            |
| Malus_spectabilis_02       | -                                                                                                                                                                                                                                  | FJ943268.1                | -            |
| Malus_spectabilis_03       | -                                                                                                                                                                                                                                  | FJ943272.1                | -            |
| Malus_transitoria_01       | -                                                                                                                                                                                                                                  | AB035928.1                | -            |
| Malus_01                   | -                                                                                                                                                                                                                                  | FJ535243.1,<br>FJ943270.1 | -            |

| Tip Name               | EST                                                                                                                                                                                                                                                                                                                                            | NT                                | Genomic                       |
|------------------------|------------------------------------------------------------------------------------------------------------------------------------------------------------------------------------------------------------------------------------------------------------------------------------------------------------------------------------------------|-----------------------------------|-------------------------------|
| Malus_02               | -                                                                                                                                                                                                                                                                                                                                              | FJ535241.1,<br>FJ943264.1         | -                             |
| Malus_03               | -                                                                                                                                                                                                                                                                                                                                              | AB096138.1,<br>FJ535240.1         | -                             |
| Medicago_truncatula_01 | GT142477.1                                                                                                                                                                                                                                                                                                                                     | -                                 | -                             |
| Medicago_truncatula_02 | -                                                                                                                                                                                                                                                                                                                                              | XM_003620719.1                    | Mtruncatu_16                  |
| Medicago_truncatula_03 | -                                                                                                                                                                                                                                                                                                                                              | XM_003624084.1                    | -                             |
| Medicago_truncatula_04 | -                                                                                                                                                                                                                                                                                                                                              | XM_003637773.1                    | Mtruncatu_21                  |
| Medicago_truncatula_05 | BE319199.2, CX526757.1,<br>CX539524.1                                                                                                                                                                                                                                                                                                          | XM_003613749.1                    | Mtruncatu_10                  |
| Medicago_truncatula_06 | -                                                                                                                                                                                                                                                                                                                                              | BT136026.1,<br>XM_003613754.1     | Mtruncatu_12                  |
| Medicago_truncatula_07 | BG646994.1, BG647157.1                                                                                                                                                                                                                                                                                                                         | XM_003613752.1                    | Mtruncatu_11                  |
| Medicago_truncatula_08 | -                                                                                                                                                                                                                                                                                                                                              | XM_003594090.1                    | Mtruncatu_02                  |
| Medicago_truncatula_09 | GE345676.1, GE350597.1                                                                                                                                                                                                                                                                                                                         | XM_003599193.1,<br>XM_003599194.1 | Mtruncatu_03,<br>Mtruncatu_04 |
| Medicago_truncatula_10 | AJ498015.1                                                                                                                                                                                                                                                                                                                                     | -                                 | Mtruncatu_05                  |
| Medicago_truncatula_11 | -                                                                                                                                                                                                                                                                                                                                              | XM_003613741.1                    | Mtruncatu_07                  |
| Medicago_truncatula_12 | AW775298.1, BF519171.1,<br>BF645898.1, BG455183.1,<br>BI263423.1, BQ165730.1,<br>CA918628.1, CF067881.1,<br>DW016055.1, DW016749.1,<br>EY476689.1, GT141725.1                                                                                                                                                                                  | BT148860.1,<br>XM_003613743.1     | Mtruncatu_08                  |
| Medicago_truncatula_13 | AW684365.1, BE202582.1,<br>BE239743.1, BG451455.1,<br>CA922286.1, EY478157.1,<br>GT139697.1, GT139923.1,<br>GT140673.1, GT144145.1,<br>GT144358.1                                                                                                                                                                                              | BT133720.1,<br>XM_003613747.1     | Mtruncatu_09                  |
| Medicago_truncatula_14 | -                                                                                                                                                                                                                                                                                                                                              | XM_003616934.1                    | Mtruncatu_13                  |
| Medicago_01            | AJ503533.1, AL371801.1,<br>AL376111.1, AW775566.1,<br>AW775880.1, AW980478.1,<br>BE124916.1, BF518644.1,<br>BF520401.1, BF649134.1,<br>BG454963.1, BG455225.1,<br>BG455347.1, BG580140.1,<br>BG581199.1, BG581672.1,<br>BI263919.1, CF069167.1,<br>CX535430.1, DY615831.1,<br>EV255202.1, EV256367.1,<br>EV262558.1, EX524557.1,<br>GE347841.1 | BT148419.1,<br>XM_003637193.1     | Mtruncatu_20                  |

| Tip Name                     | EST                                                                                                                    | NT                        | Genomic                       |
|------------------------------|------------------------------------------------------------------------------------------------------------------------|---------------------------|-------------------------------|
| Mimulus_guttatus_01          | GO946429.1, GR008377.1,<br>GR038524.1, GR038525.1,<br>GR133402.1, GR144373.1,<br>GR144374.1                            | -                         | Mguttatus_01                  |
| Mimulus_lewisii_01           | GR203325.1, GR208676.1                                                                                                 | -                         | -                             |
| Mimulus_01                   | GO979765.1, GR084192.1,<br>GR134009.1, GR134010.1,<br>GR184732.1, GR189852.1                                           | -                         | Mguttatus_04                  |
| Mimulus_02                   | GO990564.1, GO990565.1,<br>GR070495.1, GR070496.1,<br>GR086807.1, GR086808.1,<br>GR088328.1, GR088329.1                | -                         | Mguttatus_02                  |
| Mimulus_03                   | GO984157.1, GR027606.1,<br>GR040389.1, GR066153.1,<br>GR068386.1, GR090022.1,<br>GR118923.1, GR126556.1,<br>GR128121.1 | -                         | -                             |
| Misopates_orontium_01        | -                                                                                                                      | AY013906.1,<br>AY013907.1 | -                             |
| Morus_notabilis_01           | -                                                                                                                      | -                         | Mnotabili_01                  |
| Morus_notabilis_02           | -                                                                                                                      | -                         | Mnotabili_02                  |
| Musa_01                      | FF560739.1, FL649419.1,<br>FL651345.1                                                                                  | -                         | Macuminat_01,<br>Mbalbisia_01 |
| Nelumbo_nucifera_01          | -                                                                                                                      | M83668.1                  | -                             |
| Nelumbo_nucifera_02          | -                                                                                                                      | -                         | Nnucifera_04                  |
| Neolamarckia_cadamba_01      | JZ545113.1                                                                                                             | -                         | -                             |
| Nepenthes_bicalcarata_01     | -                                                                                                                      | AB872469.1                | -                             |
| Nicotiana_alata_01           | -                                                                                                                      | U45957.1                  | -                             |
| Nicotiana_alata_02           | -                                                                                                                      | U66427.1                  | -                             |
| Nicotiana_alata_03           | -                                                                                                                      | D63888.1                  | -                             |
| Nicotiana_alata_04           | -                                                                                                                      | U08860.1                  | -                             |
| Nicotiana_alata_05           | -                                                                                                                      | U08861.1                  | -                             |
| Nicotiana_alata_06           | -                                                                                                                      | D63887.1,<br>GQ850520.1   | -                             |
| Nicotiana_alata_07           | -                                                                                                                      | U13255.1,<br>U45959.1     | -                             |
| Nicotiana_benthamiana_01     | -                                                                                                                      | -                         | Nbenthami_07                  |
| Nicotiana_otophora_01        | -                                                                                                                      | -                         | Notophora_04                  |
| Nicotiana_sylvestris_01      | -                                                                                                                      | AJ002296.1                | -                             |
| Nicotiana_sylvestris_02      | -                                                                                                                      | -                         | Nsylvestr_05                  |
| Nicotiana_sylvestris_03      | -                                                                                                                      | -                         | Nsylvestr_12                  |
| Nicotiana_tomentosiformis_01 | -                                                                                                                      | -                         | Ntomentos_04                  |

| Tip Name             | EST                                                                                                                                                                                                                                                                                                                                                                                                                                                                                   | NT                                                                                        | Genomic                                                                          |
|----------------------|---------------------------------------------------------------------------------------------------------------------------------------------------------------------------------------------------------------------------------------------------------------------------------------------------------------------------------------------------------------------------------------------------------------------------------------------------------------------------------------|-------------------------------------------------------------------------------------------|----------------------------------------------------------------------------------|
| Nicotiana_01         | -                                                                                                                                                                                                                                                                                                                                                                                                                                                                                     | AB032257.1,<br>AB112026.1                                                                 | Nbenthami_05,<br>Nbenthami_12,<br>Notophora_02,<br>Nsylvestr_06                  |
| Nicotiana_02         | -                                                                                                                                                                                                                                                                                                                                                                                                                                                                                     | AB032256.1,<br>AB112027.1                                                                 | Nbenthami_02,<br>Nbenthami_06,<br>Notophora_05,<br>Nsylvestr_08,<br>Ntomentos_03 |
| Nicotiana_03         | -                                                                                                                                                                                                                                                                                                                                                                                                                                                                                     | AB112028.1                                                                                | Notophora_01,<br>Ntomentos_05                                                    |
| Nicotiana_04         | -                                                                                                                                                                                                                                                                                                                                                                                                                                                                                     | U13256.1                                                                                  | Nbenthami_04,<br>Nbenthami_11,<br>Nsylvestr_07                                   |
| Oryza_brachyantha_01 | -                                                                                                                                                                                                                                                                                                                                                                                                                                                                                     | XM_006657930.1                                                                            | -                                                                                |
| Oryza_brachyantha_02 | -                                                                                                                                                                                                                                                                                                                                                                                                                                                                                     | XM_006659370.1                                                                            | Obrachyan_04                                                                     |
| Oryza_brachyantha_03 | -                                                                                                                                                                                                                                                                                                                                                                                                                                                                                     | XM_006660835.1                                                                            | -                                                                                |
| Oryza_brachyantha_04 | -                                                                                                                                                                                                                                                                                                                                                                                                                                                                                     | XM_006660836.1                                                                            | -                                                                                |
| Oryza_punctata_01    | -                                                                                                                                                                                                                                                                                                                                                                                                                                                                                     | -                                                                                         | Opunctata_03                                                                     |
| Oryza_punctata_02    | -                                                                                                                                                                                                                                                                                                                                                                                                                                                                                     | -                                                                                         | Opunctata_04                                                                     |
| Oryza_punctata_03    | -                                                                                                                                                                                                                                                                                                                                                                                                                                                                                     | -                                                                                         | Opunctata_06                                                                     |
| Oryza_01             | AU163822.1, BI305383.1,<br>BI306312.1, CB686024.1,<br>CB965180.1, CB967070.1,<br>CF984156.1, CF984462.1,<br>CF984875.1, CF987123.1,<br>CF987585.1, CF987637.1,<br>CF988078.1, CF988214.1,<br>CF989293.1, CF989297.1,<br>CF989924.1, CF990398.1,<br>CF991233.1, CF991547.1,<br>CF991582.1, CF991946.1,<br>CF992209.1, CF992291.1,<br>CF993377.1, CF993409.1,<br>CF993555.1, CI164384.1,<br>CI215334.1, CI252890.1,<br>CI641995.1, CK076160.1,<br>CK081222.1, CT848079.1,<br>CX102339.1 | AB052842.1,<br>AB052843.1,<br>AB052844.1,<br>AK058502.1,<br>AK059802.1,<br>NM_001068412.1 | Obarthii_03,<br>Omeridion_03,<br>Onivara_04,<br>Osativa_06                       |
| Oryza_02             | AU164607.1, CI005327.1,<br>CT862596.1, CV723345.1                                                                                                                                                                                                                                                                                                                                                                                                                                     | AK104512.1,<br>CT830173.1,<br>CT830174.1,<br>NM_001066891.1                               | Oglaberri_04,<br>Oglumipat_06,<br>Omeridion_05,<br>Onivara_06,<br>Osativa_05     |

| Tip Name         | EST                                                                                                                                | NT                                                                                                                                                                                                                               | Genomic                                                       |
|------------------|------------------------------------------------------------------------------------------------------------------------------------|----------------------------------------------------------------------------------------------------------------------------------------------------------------------------------------------------------------------------------|---------------------------------------------------------------|
| Oryza_03         | CA763847.2, CB660432.1,<br>CI048175.1, CI063712.1,<br>CI312327.1, CI563863.1,<br>CK073765.1, CK083779.1,<br>CX117118.1, EX450416.1 | AK061505.1,<br>AK065055.1,<br>AK100403.1,<br>AK105061.1,<br>AK121862.1,<br>NM_001051621.1                                                                                                                                        | Oglaberri_01,<br>Omeridion_07,<br>Opunctata_07,<br>Osativa_01 |
| Oryza_04         | AU092918.1, CA763095.1,<br>CI010113.1, CI685069.1,<br>CR290472.1                                                                   | AK106167.1,<br>NM_001051622.1                                                                                                                                                                                                    | Oglumipat_08,<br>Omeridion_08,<br>Opunctata_08,<br>Osativa_02 |
| Oryza_05         | -                                                                                                                                  | -                                                                                                                                                                                                                                | Oglumipat_04,<br>Osativa_03                                   |
| Oryza_06         | -                                                                                                                                  | -                                                                                                                                                                                                                                | Onivara_01,<br>Osativa_04                                     |
| Oryza_07         | -                                                                                                                                  | AF439449.1,<br>AK098949.1,<br>AK104221.1,<br>AK104454.1,<br>AK104509.1,<br>AK104553.1,<br>AK104599.1,<br>AK104888.1,<br>AK119186.1,<br>AY056038.1,<br>AY061961.1,<br>CT833414.1,<br>EF576382.1,<br>EF576436.1,<br>NM_001070328.1 | Oglumipat_01,<br>Omeridion_01,<br>Opunctata_02,<br>Osativa_07 |
| Oryza_08         | -                                                                                                                                  | AK059757.1,<br>AK061442.1,<br>AK104237.1,<br>AK104261.1,<br>AK104263.1,<br>AK104390.1,<br>AK104456.1,<br>AK104648.1,<br>AK119171.1,<br>CT834731.1,<br>EF575920.1,<br>NM_001070329.2                                              | Oglumipat_02,<br>Omeridion_06,<br>Onivara_03,<br>Osativa_08   |
| Panax_ginseng_01 | DV553990.1, DV555270.1,<br>DV555906.1, JK985713.1,<br>JK987084.1, JK987317.1                                                       | -                                                                                                                                                                                                                                | -                                                             |

| <b>Tip Name</b>        | <b>EST</b>                                                                                                                                                                                                                                                                                                                                                                                           | <b>NT</b>                 | <b>Genomic</b> |
|------------------------|------------------------------------------------------------------------------------------------------------------------------------------------------------------------------------------------------------------------------------------------------------------------------------------------------------------------------------------------------------------------------------------------------|---------------------------|----------------|
| Panax_ginseng_02       | DV555518.1, JK985185.1                                                                                                                                                                                                                                                                                                                                                                               | -                         | -              |
| Panax_ginseng_03       | CN846941.1, CN847550.1,<br>CN848547.1, HS076088.1                                                                                                                                                                                                                                                                                                                                                    | -                         | -              |
| Panax_ginseng_04       | DV553395.1, DV553439.1,<br>DV553563.1, DV553745.1,<br>DV553775.1, DV553866.1,<br>DV553887.1, DV554370.1,<br>DV554371.1, DV554400.1,<br>DV554660.1, DV554689.1,<br>DV554719.1, DV554785.1,<br>DV554884.1, DV555013.1,<br>DV555065.1, DV555086.1,<br>DV555499.1, DV555580.1,<br>DV555607.1, DV555640.1,<br>DV555740.1, DV555824.1,<br>DV555872.1, DV555951.1,<br>DV556293.1, DV556344.1,<br>JK988361.1 | -                         | -              |
| Panax_quinquefolius_01 | GR872250.1                                                                                                                                                                                                                                                                                                                                                                                           | -                         | -              |
| Panax_01               | -                                                                                                                                                                                                                                                                                                                                                                                                    | AY496964.1,<br>KC751542.1 | -              |
| Panicum_hallii_01      | -                                                                                                                                                                                                                                                                                                                                                                                                    | -                         | Phallii_05     |



| Tip Name            | EST                                                                                                                                                                                                                                                                                                                                                                                                                                                                                                                                                                                                                                                                                            | NT | Genomic                       |
|---------------------|------------------------------------------------------------------------------------------------------------------------------------------------------------------------------------------------------------------------------------------------------------------------------------------------------------------------------------------------------------------------------------------------------------------------------------------------------------------------------------------------------------------------------------------------------------------------------------------------------------------------------------------------------------------------------------------------|----|-------------------------------|
| Panicum_virgatum_01 | FL722616.1, FL736710.1,<br>FL775130.1, FL775131.1,<br>FL781606.1, FL781607.1,<br>FL829273.1, FL829274.1,<br>FL832716.1, FL832717.1,<br>FL844428.1, FL844429.1,<br>FL848408.1, FL886490.1,<br>FL886491.1, FL898203.1,<br>FL898204.1, FL951427.1,<br>GD015858.1, GD015859.1,<br>GD020714.1, GD030401.1,<br>GD030402.1, GD044834.1,<br>HO244454.1, HO270120.1,<br>HO272688.1, HO272689.1,<br>HO283191.1, HO326434.1,<br>HO331041.1, HO343647.1,<br>HO343648.1, HO346108.1,<br>HO346109.1, JG775690.1,<br>JG775691.1, JG784556.1,<br>JG784557.1, JG793312.1,<br>JG793313.1, JG859480.1,<br>JG867799.1, JG872678.1,<br>JG874736.1, JG887259.1,<br>JG896569.1, JG915647.1,<br>JG934394.1, JG968359.1 | -  | Pvirgatum_11,<br>Pvirgatum_16 |
| Panicum_virgatum_02 | -                                                                                                                                                                                                                                                                                                                                                                                                                                                                                                                                                                                                                                                                                              | -  | Pvirgatum_01                  |
| Panicum_virgatum_03 | -                                                                                                                                                                                                                                                                                                                                                                                                                                                                                                                                                                                                                                                                                              | -  | Pvirgatum_03,<br>Pvirgatum_05 |
| Panicum_virgatum_04 | FE620023.1, FE620024.1                                                                                                                                                                                                                                                                                                                                                                                                                                                                                                                                                                                                                                                                         | -  | Pvirgatum_06                  |
| Panicum_virgatum_05 | -                                                                                                                                                                                                                                                                                                                                                                                                                                                                                                                                                                                                                                                                                              | -  | Pvirgatum_13                  |
| Panicum_virgatum_06 | -                                                                                                                                                                                                                                                                                                                                                                                                                                                                                                                                                                                                                                                                                              | -  | Pvirgatum_14                  |
| Panicum_01          | DN145948.1, DN151038.1,<br>DN151646.1, FE597622.1,<br>FE603868.1, FE610776.1,<br>FE610777.1, FE612060.1,<br>FE613496.1, FE613497.1,<br>FE614762.1, FE614763.1,<br>FE620179.1, FE620180.1,<br>FL834015.1, FL834016.1,<br>FL887203.1, FL887204.1,<br>FL887670.1, FL887671.1,<br>FL887791.1, FL887792.1,<br>FL892515.1, FL892516.1                                                                                                                                                                                                                                                                                                                                                                | -  | Phallii_01,<br>Pvirgatum_08   |

| Tip Name                  | EST                                                                                         | NT                            | Genomic                                      |
|---------------------------|---------------------------------------------------------------------------------------------|-------------------------------|----------------------------------------------|
| Panicum_02                | FL772680.1, FL784303.1,<br>FL791564.1                                                       | -                             | Phallii_06,<br>Pvirgatum_04,<br>Pvirgatum_10 |
| Papaver_bracteatum_01     | JG635005.1                                                                                  | -                             | -                                            |
| Petunia_axillaris_01      | -                                                                                           | AF239907.1                    | -                                            |
| Petunia_axillaris_02      | -                                                                                           | AF239908.1                    | -                                            |
| Petunia_axillaris_03      | FN014180.1                                                                                  | -                             | -                                            |
| Petunia_axillaris_04      | -                                                                                           | AY180049.1,<br>AY180050.1     | -                                            |
| Petunia_integrifolia_01   | -                                                                                           | M67990.2                      | -                                            |
| Petunia_integrifolia_02   | -                                                                                           | AF301533.1                    | -                                            |
| Petunia_integrifolia_03   | -                                                                                           | AB094599.1,<br>M67991.2       | -                                            |
| Petunia_x_hybrida_01      | -                                                                                           | GQ465918.1                    | -                                            |
| Petunia_x_hybrida_02      | -                                                                                           | GQ465919.1                    | -                                            |
| Petunia_x_hybrida_03      | -                                                                                           | GQ465920.1                    | -                                            |
| Petunia_01                | -                                                                                           | AB094600.1,<br>AF239910.1     | -                                            |
| Phalaenopsis_equestris_01 | CB033285.1                                                                                  | -                             | -                                            |
| Phaseolus_vulgaris_01     | -                                                                                           | XM_007147242.1                | Pvulgaris_10                                 |
| Phaseolus_vulgaris_02     | -                                                                                           | XM_007147244.1                | Pvulgaris_12                                 |
| Phaseolus_vulgaris_03     | -                                                                                           | XM_007151438.1                | Pvulgaris_08                                 |
| Phaseolus_vulgaris_04     | -                                                                                           | XM_007157555.1                | Pvulgaris_02                                 |
| Phaseolus_vulgaris_05     | -                                                                                           | XM_007158588.1                | Pvulgaris_03                                 |
| Phaseolus_vulgaris_06     | GW889193.1                                                                                  | XM_007147243.1                | Pvulgaris_11                                 |
| Phaseolus_vulgaris_07     | -                                                                                           | -                             | Pvulgaris_06                                 |
| Phaseolus_vulgaris_08     | -                                                                                           | XM_007151580.1                | Pvulgaris_09                                 |
| Phaseolus_01              | CA914129.1, CA914130.1,<br>EX303659.1, EX304583.1,<br>HS104286.1                            | KF033466.1,<br>XM_007157554.1 | Pvulgaris_01                                 |
| Phaseolus_02              | FE677978.1, FE677979.1,<br>FE677980.1, FE677981.1,<br>FE677982.1, HO781084.1,<br>JK040411.1 | XM_007135147.1                | Pvulgaris_13                                 |
| Phoenix_dactylifera_01    | -                                                                                           | XM_008804374.1                | Pdactylif_01                                 |
| Phoenix_dactylifera_02    | -                                                                                           | XM_008792751.1                | Pdactylif_02                                 |
| Phoenix_dactylifera_03    | -                                                                                           | XM_008785763.1                | Pdactylif_04                                 |
| Phoenix_dactylifera_04    | -                                                                                           | XM_008790020.1                | -                                            |
| Phyllostachys_edulis_01   | -                                                                                           | FP101767.1                    | -                                            |
| Phyllostachys_edulis_02   | -                                                                                           | FP098974.1                    | -                                            |
| Phyllostachys_edulis_03   | -                                                                                           | FP099346.1                    | -                                            |
| Phyllostachys_edulis_04   | -                                                                                           | FP099555.1                    | -                                            |

| Tip Name                 | EST                                                                                                                                                                                                                                                                                                                                                                                                                                                                                                              | NT                        | Genomic    |
|--------------------------|------------------------------------------------------------------------------------------------------------------------------------------------------------------------------------------------------------------------------------------------------------------------------------------------------------------------------------------------------------------------------------------------------------------------------------------------------------------------------------------------------------------|---------------------------|------------|
| Phyllostachys_edulis_05  | -                                                                                                                                                                                                                                                                                                                                                                                                                                                                                                                | FP093065.1,<br>FP097450.1 | Pedulis_09 |
| Physcomitrella_patens_01 | BJ167003.1, BJ198719.1,<br>BJ199181.1, BJ595980.1,<br>BJ605035.1, BJ605545.1,<br>BJ943993.1, BJ944709.1,<br>BJ948737.1, BJ954718.1,<br>BJ955485.1, BJ959631.1,<br>BJ969681.1, BJ977964.1,<br>BQ827204.1, BU052467.1,<br>BY961703.1, DC902237.1,<br>DC904653.1, DC910592.1,<br>DC911518.1, DC918545.1,<br>DC924415.1, DC925313.1,<br>DC931855.1, DC939456.1,<br>DC943336.1, DC946362.1,<br>DC953048.1, FC402811.1,<br>FC402812.1, FC423007.1,<br>FC423008.1, FC431513.1,<br>FC431514.1, FC454378.1,<br>FC454379.1 | XM_001763089.1            | Ppatens_01 |
| Physcomitrella_patens_02 | BJ182277.1, BJ183696.1,<br>BJ584821.1, BJ587210.1,<br>BJ588520.1, BJ588996.1,<br>BJ590470.1, BJ594154.1,<br>BJ959425.1, BJ968870.1,<br>BJ969462.1, BJ977765.1,<br>BQ041844.1, DC903250.1,<br>DC911807.1, DC917158.1,<br>DC925594.1                                                                                                                                                                                                                                                                               | XM_001783253.1            | Ppatens_02 |
| Picea_abies_01           | -                                                                                                                                                                                                                                                                                                                                                                                                                                                                                                                | -                         | Pabies_16  |
| Picea_glauca_01          | CK444703.2, CO250761.1,<br>DV993604.1, GE476662.1                                                                                                                                                                                                                                                                                                                                                                                                                                                                | BT101223.1                | -          |
| Picea_glauca_02          | DV994762.1, EX387059.1,<br>EX387106.1, EX387436.1,<br>EX417855.1, GE477570.1                                                                                                                                                                                                                                                                                                                                                                                                                                     | BT115923.1                | -          |
| Picea_01                 | EX322444.1, EX322815.1                                                                                                                                                                                                                                                                                                                                                                                                                                                                                           | BT105140.1                | Pabies_04  |
| Picea_02                 | CO476294.2, DV994274.1,<br>EX386424.1, EX386654.1,<br>EX386794.1, EX386828.1,<br>EX387019.1, EX387082.1,<br>EX390207.1, EX416526.1,<br>EX437355.1, EX440507.1,<br>GE475988.1                                                                                                                                                                                                                                                                                                                                     | BT101085.1                | Pabies_19  |

| Tip Name                 | EST                                                                                                                                                                                                                 | NT         | Genomic                       |
|--------------------------|---------------------------------------------------------------------------------------------------------------------------------------------------------------------------------------------------------------------|------------|-------------------------------|
| Picea_03                 | CO224322.1, CO242486.1,<br>DR548004.1, DR551667.1,<br>DR552860.1, DR554326.1,<br>DR571192.1, DV981147.2,<br>DV982018.2, EX371459.1,<br>EX371685.1, EX373310.1,<br>EX381499.1, EX381841.1,<br>EX427423.1, FD736018.1 | BT102207.1 | -                             |
| Pinus_contorta_01        | GT233987.1, GT266473.1                                                                                                                                                                                              | -          | -                             |
| Pinus_taeda_01           | DR117606.1, DR117675.1,<br>DR119280.1, DR119366.1                                                                                                                                                                   | -          | Ptaeda_11                     |
| Pinus_taeda_02           | -                                                                                                                                                                                                                   | -          | Ptaeda_03                     |
| Pinus_taeda_03           | -                                                                                                                                                                                                                   | -          | Ptaeda_06                     |
| Pinus_taeda_04           | -                                                                                                                                                                                                                   | -          | Ptaeda_07                     |
| Pinus_taeda_05           | -                                                                                                                                                                                                                   | -          | Ptaeda_10                     |
| Pinus_taeda_06           | -                                                                                                                                                                                                                   | -          | Ptaeda_16                     |
| Pinus_01                 | AI812905.1, BF186438.1,<br>BF777643.1, BQ701198.1,<br>BX253470.1, CT574625.1,<br>FE523476.1, GT261220.1,<br>GT261353.1, GT261711.1,<br>GT264781.1, GW768231.1,<br>GW768590.1                                        | FN257073.1 | -                             |
| Pinus_02                 | DR023234.1, DR685771.1,<br>DT633007.1, GW757016.1,<br>GW763726.1, GW770303.1                                                                                                                                        | -          | Ptaeda_27                     |
| Pinus_03                 | CO361681.1, CO361761.1,<br>DR178219.1, GT248524.1,<br>GT248868.1, GT260231.1,<br>GT260565.1, GW762256.1,<br>GW762578.1                                                                                              | -          | Ptaeda_15,<br>Ptaeda_17       |
| Pistacia_vera_01         | GH271766.1                                                                                                                                                                                                          | -          | -                             |
| Pisum_sativum_01         | -                                                                                                                                                                                                                   | Y11824.1   | -                             |
| Populus_euphratica_01    | -                                                                                                                                                                                                                   | -          | Peuphrati_01,<br>Peuphrati_07 |
| Populus_grandidentata_01 | -                                                                                                                                                                                                                   | -          | Pgrandide_07                  |
| Populus_grandidentata_02 | -                                                                                                                                                                                                                   | -          | Pgrandide_08                  |
| Populus_tremula_01       | -                                                                                                                                                                                                                   | -          | Ptremula_09                   |
| Populus_01               | -                                                                                                                                                                                                                   | -          | Pgrandide_04,<br>Ptremuloi_01 |

| Tip Name            | EST                                                                                                        | NT                             | Genomic                                                                           |
|---------------------|------------------------------------------------------------------------------------------------------------|--------------------------------|-----------------------------------------------------------------------------------|
| Populus_02          | AJ777201.1, BU820598.1, CA933881.1, CA934198.1, CV252907.1, DB886016.1, DB887436.1, DT495581.1, DT500664.1 | EF144433.1, XM_002321192.2     | Peuphrati_05, Pgrandide_05, Ptremula_03, Ptremuloi_03, Ptrichoca_06               |
| Populus_03          | BU869396.1, BU881802.1, DN485375.1, DN494843.1                                                             | XM_002311267.2, XM_002316099.2 | Peuphrati_02, Peuphrati_10, Pgrandide_06, Ptremula_08, Ptremuloi_08, Ptrichoca_02 |
| Populus_04          | -                                                                                                          | XM_002316100.1                 | Peuphrati_08, Pgrandide_03, Ptremula_04, Ptrichoca_04                             |
| Populus_05          | DB879124.1, DB901722.1                                                                                     | XM_002311266.2                 | Peuphrati_09, Pgrandide_01, Ptremula_07, Ptremuloi_07, Ptrichoca_01               |
| Populus_06          | -                                                                                                          | XM_002319864.2, XM_006376453.1 | Peuphrati_03, Peuphrati_04, Ptrichoca_05                                          |
| Prunus_armeniaca_01 | -                                                                                                          | AY587561.1                     | -                                                                                 |
| Prunus_avium_01     | -                                                                                                          | AJ298314.1                     | -                                                                                 |
| Prunus_avium_02     | -                                                                                                          | EU035974.1                     | -                                                                                 |
| Prunus_avium_03     | -                                                                                                          | AB096918.1                     | -                                                                                 |
| Prunus_avium_04     | -                                                                                                          | AB028154.1, AJ298313.1         | -                                                                                 |
| Prunus_avium_05     | -                                                                                                          | AB028153.1, AJ298310.1         | -                                                                                 |
| Prunus_avium_06     | -                                                                                                          | AB010305.1, AJ298315.1         | -                                                                                 |
| Prunus_avium_07     | -                                                                                                          | AB010306.1, AJ298312.1         | -                                                                                 |
| Prunus_avium_08     | -                                                                                                          | AB010304.1, AJ298311.1         | -                                                                                 |
| Prunus_cerasus_01   | -                                                                                                          | EU042128.1                     | -                                                                                 |
| Prunus_cerasus_02   | -                                                                                                          | DQ241590.1                     | -                                                                                 |
| Prunus_dulcis_01    | -                                                                                                          | AB011471.1, AB481108.1         | -                                                                                 |
| Prunus_dulcis_02    | -                                                                                                          | AY291117.1                     | -                                                                                 |
| Prunus_dulcis_03    | -                                                                                                          | AB011470.1                     | -                                                                                 |
| Prunus_dulcis_04    | -                                                                                                          | DQ093825.1                     | -                                                                                 |

| Tip Name                | EST                    | NT                                           | Genomic                  |
|-------------------------|------------------------|----------------------------------------------|--------------------------|
| Prunus_dulcis_05        | -                      | DQ157873.1                                   | -                        |
| Prunus_dulcis_06        | -                      | AB026836.1                                   | -                        |
| Prunus_dulcis_07        | -                      | AB011469.1,<br>DQ157874.1                    | -                        |
| Prunus_mume_01          | -                      | EU020123.1                                   | -                        |
| Prunus_mume_02          | -                      | AB101437.1                                   | -                        |
| Prunus_mume_03          | -                      | EU020118.1,<br>EU020122.1                    | -                        |
| Prunus_mume_04          | -                      | AB047100.1,<br>AB101438.1                    | -                        |
| Prunus_persica_01       | -                      | AB537563.1                                   | -                        |
| Prunus_persica_02       | -                      | AB537565.1                                   | -                        |
| Prunus_pseudocerasus_01 | -                      | EU073939.1                                   | -                        |
| Prunus_pseudocerasus_02 | -                      | EU253960.1                                   | -                        |
| Prunus_pseudocerasus_03 | -                      | FJ543097.1                                   | -                        |
| Prunus_pseudocerasus_04 | -                      | FJ543099.1                                   | -                        |
| Prunus_pseudocerasus_05 | -                      | FJ628598.1,<br>HQ913635.1                    | -                        |
| Prunus_pseudocerasus_06 | -                      | EU073938.1,<br>EU253959.1                    | -                        |
| Prunus_salicina_01      | -                      | AB084102.1                                   | -                        |
| Prunus_salicina_02      | -                      | AB026982.1                                   | -                        |
| Prunus_salicina_03      | -                      | DQ512911.1                                   | -                        |
| Prunus_salicina_04      | -                      | DQ512912.1                                   | -                        |
| Prunus_salicina_05      | -                      | DQ512913.1                                   | -                        |
| Prunus_salicina_06      | -                      | DQ512914.1                                   | -                        |
| Prunus_webbii_01        | -                      | DQ993661.1                                   | -                        |
| Prunus_01               | -                      | AF227522.1,<br>XM_007223857.1                | Pmume_06,<br>Ppersica_02 |
| Prunus_02               | -                      | XM_007209513.1                               | Pmume_02,<br>Ppersica_04 |
| Prunus_03               | BU045659.1, FC861706.1 | XM_007201249.1                               | Pmume_05,<br>Ppersica_06 |
| Prunus_04               | -                      | AB084103.1,<br>DQ157875.1                    | -                        |
| Prunus_05               | -                      | AB092644.1,<br>AB101439.1,<br>EU253962.1     | -                        |
| Prunus_06               | -                      | AB026981.1,<br>DQ099895.1,<br>XM_007207516.1 | Ppersica_05              |
| Prunus_07               | -                      | DQ157876.1,<br>EU253961.1                    | -                        |

| Tip Name                  | EST        | NT                                                                                    | Genomic                  |
|---------------------------|------------|---------------------------------------------------------------------------------------|--------------------------|
| Prunus_08                 | GR410459.1 | AF202030.1,<br>XM_007223859.1                                                         | Pmume_07,<br>Ppersica_01 |
| Punica_granatum_01        | JZ123328.1 | -                                                                                     | -                        |
| Pyrus_communis_02         | -          | AB258360.1                                                                            | -                        |
| Pyrus_communis_03         | -          | AB731592.1,<br>EU855799.1,<br>KF500092.1,<br>KF500093.1,<br>KF500094.1,<br>KF500095.1 | -                        |
| Pyrus_communis_04         | -          | KF500082.1                                                                            | -                        |
| Pyrus_communis_05         | -          | KF500089.1                                                                            | -                        |
| Pyrus_communis_06         | -          | KF500069.1,<br>KF500070.1,<br>KF500071.1,<br>KF500072.1,<br>KF500090.1                | -                        |
| Pyrus_communis_07         | -          | KF500091.1                                                                            | -                        |
| Pyrus_communis_08         | -          | AB236432.1,<br>KF500073.1,<br>KF500074.1,<br>KF500075.1                               | -                        |
| Pyrus_communis_09         | -          | KF500087.1,<br>KF500088.1                                                             | -                        |
| Pyrus_communis_10         | -          | KF500083.1,<br>KF500084.1,<br>KF500085.1,<br>KF500086.1                               | -                        |
| Pyrus_communis_11         | -          | KF500079.1,<br>KF500080.1,<br>KF500081.1                                              | -                        |
| Pyrus_pyrifolia_01        | -          | D49527.1                                                                              | -                        |
| Pyrus_pyrifolia_02        | -          | AB002139.1,<br>AB014072.1,<br>D49528.1                                                | -                        |
| Pyrus_pyrifolia_03        | -          | AB002142.1                                                                            | -                        |
| Pyrus_pyrifolia_04        | -          | AB104909.1                                                                            | -                        |
| Pyrus_pyrifolia_05        | -          | AB002140.1,<br>AB002141.1,<br>AB025421.1,<br>AB045711.1,<br>D88282.1                  | -                        |
| Pyrus_x_bretschneideri_01 | -          | -                                                                                     | Px_05                    |
| Pyrus_01                  | -          | AB284262.1                                                                            | Pcommunis_06             |

| Tip Name            | EST                                                                                                                                                                                                                                                                                                                                                                                                                                                                                                                          | NT                                                      | Genomic                                 |
|---------------------|------------------------------------------------------------------------------------------------------------------------------------------------------------------------------------------------------------------------------------------------------------------------------------------------------------------------------------------------------------------------------------------------------------------------------------------------------------------------------------------------------------------------------|---------------------------------------------------------|-----------------------------------------|
| Pyrus_02            | -                                                                                                                                                                                                                                                                                                                                                                                                                                                                                                                            | -                                                       | Pcommunis_01,<br>Pcommunis_08,<br>Px_07 |
| Pyrus_03            | -                                                                                                                                                                                                                                                                                                                                                                                                                                                                                                                            | D49529.1                                                | Pcommunis_02,<br>Px_06                  |
| Pyrus_04            | -                                                                                                                                                                                                                                                                                                                                                                                                                                                                                                                            | -                                                       | Pcommunis_05,<br>Pcommunis_07,<br>Px_08 |
| Pyrus_05            | -                                                                                                                                                                                                                                                                                                                                                                                                                                                                                                                            | AB426604.1,<br>KF500076.1,<br>KF500077.1,<br>KF500078.1 | -                                       |
| Pyrus_06            | -                                                                                                                                                                                                                                                                                                                                                                                                                                                                                                                            | AB002143.1                                              | Px_03                                   |
| Quercus_robur_01    | FP024803.1, FP026336.1,<br>FP027288.1, FP027904.1,<br>FP030531.1                                                                                                                                                                                                                                                                                                                                                                                                                                                             | -                                                       | -                                       |
| Quercus_01          | FN698267.1, FN698652.1,<br>FN701320.1, FN707157.1,<br>FN726935.1, FN727424.1,<br>FN735842.1, FN749412.1,<br>FR631903.1, FR633503.1                                                                                                                                                                                                                                                                                                                                                                                           | -                                                       | -                                       |
| Raphanus_sativus_02 | -                                                                                                                                                                                                                                                                                                                                                                                                                                                                                                                            | -                                                       | Rsativus_10,<br>Rsativus_11             |
| Raphanus_01         | EV529122.1, EV532941.1,<br>EV537523.1, EV537599.1,<br>EV541798.1, EV548667.1,<br>EW716601.1, EW716869.1,<br>EW721186.1, EW721990.1,<br>EX747791.1, EX751897.1,<br>EX758247.1, EX761651.1,<br>EX772252.1, EX887881.1,<br>EX891919.1, EY897856.1,<br>EY927123.1, EY928590.1,<br>EY931078.1, EY933002.1,<br>EY933719.1, EY936647.1,<br>EY937174.1, EY937436.1,<br>EY940976.1, EY942779.1,<br>EY946748.1, FD533241.1,<br>FD539032.1, FD543137.1,<br>FD544259.1, FD569252.1,<br>FD570438.1, FD573492.1,<br>FD966590.1, FD969503.1 | -                                                       | Rsativus_02                             |



| Tip Name            | EST                                                                                                                                                                                                                                                                                                                                                                                                                                                                                                                                                                                                                          | NT             | Genomic      |
|---------------------|------------------------------------------------------------------------------------------------------------------------------------------------------------------------------------------------------------------------------------------------------------------------------------------------------------------------------------------------------------------------------------------------------------------------------------------------------------------------------------------------------------------------------------------------------------------------------------------------------------------------------|----------------|--------------|
| Raphanus_02         | EV543436.1, EV546075.1,<br>EV547595.1, EW714617.1,<br>EW719449.1, EW723025.1,<br>EW725342.1, EW725377.1,<br>EW727831.1, EW728728.1,<br>EW730730.1, EW730759.1,<br>EX747025.1, EX747748.1,<br>EX751318.1, EX763865.1,<br>EX764017.1, EX768021.1,<br>EX770054.1, EX774312.1,<br>EX886832.1, EX888177.1,<br>EX892163.1, EY906100.1,<br>EY917495.1, EY921326.1,<br>EY923344.1, EY935557.1,<br>EY937115.1, EY941563.1,<br>EY947967.1, FD542897.1,<br>FD545265.1, FD549177.1,<br>FD552456.1, FD556095.1,<br>FD560447.1, FD564747.1,<br>FD570683.1, FD574645.1,<br>FD950616.1, FD954341.1,<br>FD964344.1, FD989950.1,<br>FY428434.1 | -              | -            |
| Raphanus_03         | EW735374.1, EX762349.1,<br>EX766624.1, EX897376.1,<br>EX901148.1, EX901971.1,<br>EY894773.1, EY898830.1,<br>FD943097.1, FD947092.1                                                                                                                                                                                                                                                                                                                                                                                                                                                                                           | -              | Rsativus_05  |
| Raphanus_04         | EX762958.1, EX767119.1,<br>EX895670.1, EY894225.1,<br>EY898063.1, EY904738.1,<br>FD556340.1, FD568640.1,<br>FD572358.1, FD572951.1,<br>FD576014.1, FD951555.1,<br>FD955498.1, FD955762.1                                                                                                                                                                                                                                                                                                                                                                                                                                     | -              | Rsativus_12  |
| Raphanus_05         | EV536807.1, EV541172.1,<br>EX758032.1, EX761474.1,<br>EX764843.1, EY933373.1,<br>FD583073.1, FD970181.1                                                                                                                                                                                                                                                                                                                                                                                                                                                                                                                      | -              | -            |
| Raphanus_06         | EV527105.1, EV531426.1,<br>FD534737.1, FD960160.1,<br>FD963621.1, FD964030.1,<br>FD974709.1, FD978468.1                                                                                                                                                                                                                                                                                                                                                                                                                                                                                                                      | -              | Rsativus_09  |
| Ricinus_communis_01 | -                                                                                                                                                                                                                                                                                                                                                                                                                                                                                                                                                                                                                            | XM_002522396.1 | Rcommunis_01 |

| Tip Name                      | EST                                                                                                     | NT                                | Genomic      |
|-------------------------------|---------------------------------------------------------------------------------------------------------|-----------------------------------|--------------|
| Ricinus_communis_02           | -                                                                                                       | XM_002512884.1                    | Rcommunis_05 |
| Ricinus_communis_03           | -                                                                                                       | XM_002522397.1                    | Rcommunis_02 |
| Ricinus_communis_04           | EG658351.1, EG660818.1,<br>EG664696.1, GE635005.1                                                       | XM_002524508.1,<br>XM_002524535.1 | -            |
| Sarcocapnos_crassifolia_01    | JG643252.1                                                                                              | -                                 | -            |
| Sarracenia_leucophylla_01     | -                                                                                                       | AB872468.1                        | -            |
| Saruma_henryi_01              | DT599406.1                                                                                              | -                                 | -            |
| Saruma_henryi_02              | DT576274.1, DT587986.1,<br>DT590202.1, DT590500.1,<br>DT598928.1, DT600891.1,<br>DT602889.1, DT603017.1 | -                                 | -            |
| Saussurea_medusa_01           | FG269154.1                                                                                              | -                                 | -            |
| Selaginella_moellendorffii_01 | -                                                                                                       | XM_002960270.1,<br>XM_002967350.1 | Smoellend_01 |
| Selaginella_moellendorffii_02 | FE476369.1, FE476370.1,<br>FE500619.1, FE500620.1,<br>FE513434.1, FE513435.1                            | XM_002965953.1,<br>XM_002989181.1 | Smoellend_02 |
| Senecio_chrysanthemifolius_01 | DY658128.1                                                                                              | -                                 | -            |
| Sesamum_indicum_01            | -                                                                                                       | -                                 | Sindicum_02  |
| Sesamum_indicum_02            | -                                                                                                       | -                                 | Sindicum_03  |
| Setaria_italica_01            | -                                                                                                       | XM_004973464.1                    | Sitalica_07  |
| Setaria_italica_02            | -                                                                                                       | XM_004958353.1                    | Sitalica_04  |
| Setaria_italica_03            | EC612152.1                                                                                              | XM_004970841.1                    | Sitalica_05  |
| Setaria_italica_04            | -                                                                                                       | XM_004957426.1,<br>XM_004957427.1 | Sitalica_01  |
| Setaria_italica_05            | -                                                                                                       | NM_001287232.1                    | Sitalica_02  |
| Setaria_italica_06            | -                                                                                                       | XM_004958352.1                    | Sitalica_03  |
| Setaria_italica_07            | -                                                                                                       | XM_004970840.1                    | Sitalica_06  |
| Silene_latifolia_01           | GH291844.1                                                                                              | -                                 | -            |
| Silene_latifolia_02           | GH292195.1                                                                                              | -                                 | -            |
| Silene_latifolia_03           | GH293331.1                                                                                              | -                                 | -            |
| Silene_latifolia_04           | GH291783.1, GH293996.1                                                                                  | -                                 | -            |
| Siraitia_grosvenorii_01       | -                                                                                                       | HQ141616.1                        | -            |
| Siraitia_grosvenorii_02       | HS403338.1                                                                                              | -                                 | -            |
| Siraitia_grosvenorii_03       | HS408153.1                                                                                              | -                                 | -            |
| Sisymbrium_irio_01            | -                                                                                                       | -                                 | Sirio_01     |
| Sisymbrium_irio_02            | -                                                                                                       | -                                 | Sirio_02     |
| Sisymbrium_irio_03            | -                                                                                                       | -                                 | Sirio_03     |
| Sisymbrium_irio_04            | -                                                                                                       | -                                 | Sirio_04     |
| Sisymbrium_irio_05            | -                                                                                                       | -                                 | Sirio_05     |
| Solanum_chacoense_01          | -                                                                                                       | X56896.1                          | -            |
| Solanum_chacoense_02          | -                                                                                                       | X56897.1                          | -            |

| <b>Tip Name</b>         | <b>EST</b>                                                                                                                                                                                              | <b>NT</b>                                           | <b>Genomic</b> |
|-------------------------|---------------------------------------------------------------------------------------------------------------------------------------------------------------------------------------------------------|-----------------------------------------------------|----------------|
| Solanum_chacoense_03    | -                                                                                                                                                                                                       | AF232304.1,<br>L36666.1                             | -              |
| Solanum_chacoense_04    | -                                                                                                                                                                                                       | AF176533.1,<br>AF191732.1                           | -              |
| Solanum_chilense_01     | -                                                                                                                                                                                                       | AB072469.1,<br>EF680106.1                           | -              |
| Solanum_lycopersicum_01 | -                                                                                                                                                                                                       | XM_004229015.1                                      | Slycopers_01   |
| Solanum_melongena_01    | FS074787.1, FS074788.1,<br>FS084880.1, FS084881.1                                                                                                                                                       | -                                                   | -              |
| Solanum_melongena_02    | FS027270.1, FS027286.1,<br>FS027520.1, FS027743.1,<br>FS027753.1, FS027970.1,<br>FS028991.1, FS030329.1,<br>FS030330.1, FS030348.1,<br>FS031360.1, FS032889.1,<br>FS079451.1, FS079459.1,<br>FS079816.1 | -                                                   | -              |
| Solanum_neorickii_01    | -                                                                                                                                                                                                       | AB072475.1                                          | -              |
| Solanum_pennellii_01    | -                                                                                                                                                                                                       | -                                                   | Spennelli_04   |
| Solanum_peruvianum_01   | -                                                                                                                                                                                                       | AB072466.1                                          | -              |
| Solanum_peruvianum_02   | -                                                                                                                                                                                                       | S61768.1,<br>X76065.1                               | -              |
| Solanum_peruvianum_03   | -                                                                                                                                                                                                       | Z26583.1                                            | -              |
| Solanum_peruvianum_04   | -                                                                                                                                                                                                       | Z26582.1                                            | -              |
| Solanum_peruvianum_05   | -                                                                                                                                                                                                       | D17325.1                                            | -              |
| Solanum_stenotomum_01   | -                                                                                                                                                                                                       | HM446648.1                                          | -              |
| Solanum_tuberosum_01    | -                                                                                                                                                                                                       | X62727.1                                            | -              |
| Solanum_tuberosum_02    | -                                                                                                                                                                                                       | XM_006344269.1                                      | Stuberosu_01   |
| Solanum_tuberosum_03    | BE920237.1, BE920972.1,<br>BE923485.1, BF053199.1,<br>BF054468.1, BG096450.1,<br>BG591767.1                                                                                                             | XM_006343488.1                                      | Stuberosu_16   |
| Solanum_01              | -                                                                                                                                                                                                       | AB072464.1,<br>AB072478.1,<br>S81597.1,<br>U28796.1 | Shabrocha_02   |
| Solanum_02              | -                                                                                                                                                                                                       | AB072477.1,<br>Z26581.1                             | Sarcanum_03    |

| Tip Name   | EST                                                                                                                                                                                                                                                                                                                                                                                                                                                                                   | NT                                                                           | Genomic                                                                          |
|------------|---------------------------------------------------------------------------------------------------------------------------------------------------------------------------------------------------------------------------------------------------------------------------------------------------------------------------------------------------------------------------------------------------------------------------------------------------------------------------------------|------------------------------------------------------------------------------|----------------------------------------------------------------------------------|
| Solanum_03 | AI483500.1, AI483637.1,<br>AI484924.1, AI484997.1,<br>AI485790.1, AI487298.1,<br>AI487581.1, AI487712.1,<br>AI490252.1, AI899246.1,<br>BE434000.1, BE441192.1,<br>BF051673.1, BI930311.1,<br>BP879013.1, BW690582.1,<br>GO372869.1                                                                                                                                                                                                                                                    | XM_004242617.1                                                               | Sarcantum_09,<br>Slycopers_10,<br>Spennelli_10,<br>Spimpinel_01                  |
| Solanum_04 | -                                                                                                                                                                                                                                                                                                                                                                                                                                                                                     | XM_004236993.1,<br>XM_006344205.1                                            | Sarcantum_05,<br>Shabrocha_07,<br>Spennelli_01,<br>Spimpinel_09                  |
| Solanum_05 | AI484830.1, AI485206.1,<br>AI486253.1, AI488432.1,<br>AI489460.1, AI772676.1,<br>AI775352.1                                                                                                                                                                                                                                                                                                                                                                                           | AJ536577.1,<br>NM_001247266.1,<br>XM_006355040.1,<br>Y17444.1,<br>Y17445.1   | Sarcantum_12,<br>Shabrocha_09,<br>Slycopers_04,<br>Spennelli_03                  |
| Solanum_06 | BI210026.1, CK862438.1,<br>CK864217.1, DB682061.1,<br>DB694833.1, DN906554.1,<br>DN906555.1, DV105079.2,<br>FS192769.1, JG561767.1                                                                                                                                                                                                                                                                                                                                                    | AK329027.1,<br>AM231403.1,<br>NM_001247622.1,<br>XM_006355041.1,<br>Y17446.1 | Sarcantum_11,<br>Shabrocha_10,<br>Slycopers_03,<br>Spennelli_02,<br>Spimpinel_10 |
| Solanum_07 | AW039494.1, AW216541.1,<br>AW223027.1, AW224120.1,<br>BE435686.1, BF098167.1,<br>BF113095.1, BF187990.1,<br>BG350033.1, BG597684.1,<br>BP877116.1, BP888309.1,<br>BQ119665.2, BW685467.1,<br>BW685550.1, CK263423.1,<br>CK263485.1, CK263486.1,<br>CK271885.1, CK271886.1,<br>CK276081.1, CK276082.1,<br>CK276102.1, CK717429.1,<br>CK718633.1, DB689435.1,<br>DB689465.1, DB704869.1,<br>DB711181.1, DN743819.1,<br>DR034528.1, ES891495.1,<br>ES893943.1, ES896627.1,<br>FS194487.1 | AK324819.1,<br>AM408589.1,<br>XM_004246194.1,<br>XM_006344282.1              | Sarcantum_04,<br>Shabrocha_01,<br>Spennelli_11,<br>Spimpinel_02                  |
| Solanum_08 | -                                                                                                                                                                                                                                                                                                                                                                                                                                                                                     | GU361149.1,<br>JQ040817.1,<br>U28795.1                                       | -                                                                                |

| Tip Name           | EST                                                                                                                                                                                                                                                                                                                                                                                                                                                                                                                                                                                | NT                                                                  | Genomic                                                         |
|--------------------|------------------------------------------------------------------------------------------------------------------------------------------------------------------------------------------------------------------------------------------------------------------------------------------------------------------------------------------------------------------------------------------------------------------------------------------------------------------------------------------------------------------------------------------------------------------------------------|---------------------------------------------------------------------|-----------------------------------------------------------------|
| Solanum_09         | -                                                                                                                                                                                                                                                                                                                                                                                                                                                                                                                                                                                  | L36464.1,<br>L36667.1,<br>XM_006347185.1                            | Stuberosu_09                                                    |
| Solanum_10         | DN982172.1                                                                                                                                                                                                                                                                                                                                                                                                                                                                                                                                                                         | XM_006367757.1                                                      | Stuberosu_04                                                    |
| Solanum_11         | FG646836.1, FG647168.1                                                                                                                                                                                                                                                                                                                                                                                                                                                                                                                                                             | XM_006343638.1                                                      | Stuberosu_11                                                    |
| Solanum_12         | AI484064.1, AI488160.1,<br>AI488272.1, AW094303.1,<br>AW928412.1, BE463383.1,<br>JG567141.1                                                                                                                                                                                                                                                                                                                                                                                                                                                                                        | XM_004242616.1                                                      | Sarcantum_08,<br>Shabrocha_04,<br>Spennelli_09,<br>Spimpinel_08 |
| Solanum_13         | AW034883.1, AW623083.1,<br>BE432989.1, CK254404.1,<br>CK254405.1, CK264609.1,<br>CK264610.1, CV503834.1,<br>DB681039.1, DB689334.1,<br>DB711096.1, DB715473.1                                                                                                                                                                                                                                                                                                                                                                                                                      | AK320420.1,<br>XM_004242409.1,<br>XM_006366747.1,<br>XM_006366748.1 | Shabrocha_08,<br>Slycopers_07,<br>Spimpinel_07,<br>Stuberosu_10 |
| Sorghum_bicolor_01 | CD206103.1, CD429506.1,<br>CF769657.1, CN135898.1,<br>CN137644.1, CN140516.1,<br>CN141890.1, CN143042.1,<br>CN143355.1, CN143680.1,<br>CN143686.1, CN143787.1,<br>CN143840.1, CN143847.1,<br>CN144335.1, CN144345.1,<br>CN144369.1, CN144379.1,<br>CN144764.1, CN144945.1,<br>CN145077.1, CN145269.1,<br>CN145275.1, CN145415.1,<br>CN145693.1, CN145826.1,<br>CN146004.1, CN146317.1,<br>CN147050.1, CN147051.1,<br>CN147247.1, CN147542.1,<br>CN148605.1, CN148770.1,<br>CN149104.1, CN149588.1,<br>CN150400.1, CN151162.1,<br>CN151341.1, CN152348.1,<br>CN152382.1, CN152782.1 | XM_002460533.1,<br>XM_002462696.1                                   | Sbicolor_01                                                     |
| Sorghum_bicolor_02 | -                                                                                                                                                                                                                                                                                                                                                                                                                                                                                                                                                                                  | XM_002462697.1                                                      | Sbicolor_02                                                     |
| Sorghum_bicolor_03 | -                                                                                                                                                                                                                                                                                                                                                                                                                                                                                                                                                                                  | XM_002458873.1                                                      | Sbicolor_05                                                     |
| Sorghum_bicolor_04 | -                                                                                                                                                                                                                                                                                                                                                                                                                                                                                                                                                                                  | XM_002445504.1                                                      | Sbicolor_06                                                     |
| Sorghum_bicolor_05 | -                                                                                                                                                                                                                                                                                                                                                                                                                                                                                                                                                                                  | XM_002461025.1                                                      | -                                                               |

| Tip Name                 | EST                                                                                                                                                                                            | NT             | Genomic      |
|--------------------------|------------------------------------------------------------------------------------------------------------------------------------------------------------------------------------------------|----------------|--------------|
| Sorghum_bicolor_06       | AW671991.1, BE595388.1, BM317485.1, CD231761.1, CF427100.1, CF427912.1, CF482072.1, CN125135.1, CN125196.1, CN133430.1, CN135314.1, CN135382.1, CN142030.1, CX607577.1, CX613710.1, EH407676.1 | XM_002458872.1 | -            |
| Spinacia_oleracea_01     | -                                                                                                                                                                                              | -              | Soleracea_02 |
| Spinacia_oleracea_02     | -                                                                                                                                                                                              | -              | Soleracea_03 |
| Spinacia_oleracea_03     | -                                                                                                                                                                                              | -              | Soleracea_04 |
| Spinacia_oleracea_04     | -                                                                                                                                                                                              | -              | Soleracea_05 |
| Spinacia_oleracea_05     | -                                                                                                                                                                                              | -              | Soleracea_06 |
| Spinacia_oleracea_06     | -                                                                                                                                                                                              | -              | Soleracea_07 |
| Spinacia_oleracea_07     | -                                                                                                                                                                                              | -              | Soleracea_08 |
| Striga_hermonthica_01    | FS464251.1, FS464325.1, FS474477.1, FS477979.1, FS481098.1, FS484749.1, FS496693.1, FS501666.1, FS505235.1, FS506507.1                                                                         | -              | -            |
| Suaeda_glauca_01         | HS411145.1                                                                                                                                                                                     | -              | -            |
| Syntrichia_ruralis_01    | CN203860.1, CN204134.1, CN204378.1, CN206506.1                                                                                                                                                 | -              | -            |
| Taraxacum_kok-saghyz_01  | DR400763.1, GO668307.1                                                                                                                                                                         | -              | -            |
| Taraxacum_officinale_01  | DY818026.1, DY820763.1, DY822438.1, DY823103.1, DY823518.1, DY825188.1, DY826122.1, DY828460.1, DY828503.1, DY830137.1, DY832759.1, DY832799.1                                                 | -              | -            |
| Taxus_baccata_01         | -                                                                                                                                                                                              | -              | Tbaccata_01  |
| Thellungiella_parvula_01 | -                                                                                                                                                                                              | -              | Tparvula_01  |
| Thellungiella_parvula_02 | -                                                                                                                                                                                              | -              | Tparvula_02  |
| Thellungiella_parvula_03 | -                                                                                                                                                                                              | -              | Tparvula_03  |
| Thellungiella_parvula_04 | -                                                                                                                                                                                              | -              | Tparvula_04  |
| Thellungiella_parvula_05 | -                                                                                                                                                                                              | -              | Tparvula_05  |
| Theobroma_cacao_01       | -                                                                                                                                                                                              | XM_007011015.1 | Tcacao_04    |
| Theobroma_cacao_02       | -                                                                                                                                                                                              | -              | Tcacao_09    |
| Theobroma_cacao_03       | -                                                                                                                                                                                              | XM_007011024.1 | Tcacao_10    |
| Theobroma_cacao_04       | -                                                                                                                                                                                              | XM_007011025.1 | Tcacao_11    |
| Theobroma_cacao_05       | -                                                                                                                                                                                              | XM_007045626.1 | Tcacao_15    |
| Theobroma_cacao_06       | -                                                                                                                                                                                              | XM_007046018.1 | Tcacao_16    |
| Theobroma_cacao_07       | -                                                                                                                                                                                              | XM_007046019.1 | Tcacao_17    |

| Tip Name                | EST                                                                                                                                                                                                                                                                                                                                                                                                                                                                                   | NT                                | Genomic                       |
|-------------------------|---------------------------------------------------------------------------------------------------------------------------------------------------------------------------------------------------------------------------------------------------------------------------------------------------------------------------------------------------------------------------------------------------------------------------------------------------------------------------------------|-----------------------------------|-------------------------------|
| Theobroma_cacao_08      | -                                                                                                                                                                                                                                                                                                                                                                                                                                                                                     | XM_007038786.1                    | Tcacao_19                     |
| Theobroma_cacao_09      | -                                                                                                                                                                                                                                                                                                                                                                                                                                                                                     | XM_007038787.1                    | Tcacao_20                     |
| Theobroma_cacao_10      | CU541598.1                                                                                                                                                                                                                                                                                                                                                                                                                                                                            | XM_007099524.1                    | Tcacao_21                     |
| Theobroma_cacao_11      | -                                                                                                                                                                                                                                                                                                                                                                                                                                                                                     | XM_007015690.1                    | Tcacao_22                     |
| Theobroma_cacao_12      | -                                                                                                                                                                                                                                                                                                                                                                                                                                                                                     | XM_007011012.1                    | Tcacao_02                     |
| Theobroma_cacao_13      | -                                                                                                                                                                                                                                                                                                                                                                                                                                                                                     | XM_007011082.1,<br>XM_007011091.1 | Tcacao_13                     |
| Theobroma_cacao_14      | CU477139.1, CU483035.1,<br>CU483081.1, CU511781.1,<br>CU532484.1, CU572167.1,<br>CU585846.1, CU631208.1                                                                                                                                                                                                                                                                                                                                                                               | XM_007049456.1                    | Tcacao_01                     |
| Tinospora_cordifolia_01 | JG646684.1, JG647636.1,<br>JG647986.1, JG648665.1                                                                                                                                                                                                                                                                                                                                                                                                                                     | -                                 | -                             |
| Trifolium_01            | FY467235.1                                                                                                                                                                                                                                                                                                                                                                                                                                                                            | -                                 | Tpratense_13                  |
| Triphysaria_pusilla_01  | EY125139.1, EY125140.1,<br>EY127480.1, EY129135.1,<br>EY129136.1, EY137596.1                                                                                                                                                                                                                                                                                                                                                                                                          | -                                 | -                             |
| Triphysaria_pusilla_02  | EY129378.1, EY129379.1,<br>EY130399.1, EY130400.1,<br>EY133768.1, EY133769.1                                                                                                                                                                                                                                                                                                                                                                                                          | -                                 | -                             |
| Triticum_aestivum_01    | BE404484.1, BE446370.1,<br>BE490784.1, BF474879.1,<br>BM137478.1, BQ743175.1,<br>BQ839366.1, CD880969.1,<br>CD883497.1, CD934128.1,<br>CD935410.1, CJ609574.1,<br>CJ714149.1, CJ858914.1,<br>CJ871783.1, CJ872106.1,<br>CJ906652.1, CJ906949.1,<br>CJ908004.1, CJ918841.1,<br>CK162572.1, CK196093.1,<br>CK204714.1, CK205063.1,<br>CV765953.1, CV766315.1,<br>CV768622.1, CV768966.1,<br>CV773086.1, CV774799.1,<br>CV776659.1, CV779426.1,<br>GR303949.1, HX165334.1,<br>HX165359.1 | -                                 | -                             |
| Triticum_aestivum_02    | CA485852.1                                                                                                                                                                                                                                                                                                                                                                                                                                                                            | -                                 | -                             |
| Triticum_aestivum_03    | CA486081.1, CA486574.1                                                                                                                                                                                                                                                                                                                                                                                                                                                                | -                                 | -                             |
| Triticum_aestivum_04    | -                                                                                                                                                                                                                                                                                                                                                                                                                                                                                     | -                                 | Taestivum_02,<br>Taestivum_04 |
| Triticum_aestivum_05    | -                                                                                                                                                                                                                                                                                                                                                                                                                                                                                     | -                                 | Taestivum_17                  |

| <b>Tip Name</b>      | <b>EST</b>                                                                                                                                                                                                          | <b>NT</b>                 | <b>Genomic</b>                               |
|----------------------|---------------------------------------------------------------------------------------------------------------------------------------------------------------------------------------------------------------------|---------------------------|----------------------------------------------|
| Triticum_aestivum_06 | CD861839.1, CJ708490.1,<br>CJ719265.1, CJ946214.1,<br>CJ946215.1, CK163004.1,<br>CK163696.1, CV768232.1,<br>DR737634.1, DR738148.1,<br>DR738150.1, DR738403.1,<br>DR740799.1                                        | AF495872.1,<br>BT009061.1 | Taestivum_05                                 |
| Triticum_01          | BE490205.1, BE606798.1,<br>BJ234043.1, BJ239911.1,<br>BJ255561.1, CD893232.1,<br>CD902102.1, CJ551219.1,<br>CJ553755.1, CJ578775.1,<br>CJ658858.1, CJ661175.1,<br>CJ661288.1, CJ679536.1,<br>CJ685369.1, CV759414.1 | AY528721.1                | Taestivum_11,<br>Taestivum_13,<br>Turartu_03 |



| Tip Name    | EST                                                                                                                                                                                                                                                                                                                                                                                                                                                                                                                                                                                                                                                                                                                                                                                                                       | NT         | Genomic                                      |
|-------------|---------------------------------------------------------------------------------------------------------------------------------------------------------------------------------------------------------------------------------------------------------------------------------------------------------------------------------------------------------------------------------------------------------------------------------------------------------------------------------------------------------------------------------------------------------------------------------------------------------------------------------------------------------------------------------------------------------------------------------------------------------------------------------------------------------------------------|------------|----------------------------------------------|
| Triticum_02 | AJ612369.1, AL823028.1,<br>AM285636.1, BF473141.1,<br>BJ260079.1, BJ265782.1,<br>BQ743375.1, BQ789161.1,<br>CD881383.1, CD881384.1,<br>CD882147.1, CD883909.1,<br>CJ559305.1, CJ562454.1,<br>CJ562735.1, CJ562767.1,<br>CJ563993.1, CJ568863.1,<br>CJ581880.1, CJ582159.1,<br>CJ583559.1, CJ585517.1,<br>CJ586244.1, CJ594127.1,<br>CJ666567.1, CJ669616.1,<br>CJ669914.1, CJ671095.1,<br>CJ675789.1, CJ687780.1,<br>CJ688329.1, CJ688623.1,<br>CJ689991.1, CJ691853.1,<br>CJ692545.1, CJ700008.1,<br>CJ859127.1, CJ871950.1,<br>CJ947397.1, CJ959374.1,<br>CK206023.1, CK208373.1,<br>CK213974.1, CK214409.1,<br>CK215112.1, CK216067.1,<br>CV770507.1, CV778383.1,<br>HX040363.1, HX125484.1,<br>HX125504.1, HX129860.1,<br>HX129887.1, HX153677.1,<br>HX153705.1, HX173417.1,<br>HX173443.1, HX197197.1,<br>HX197227.1 | AY517470.1 | Taestivum_23,<br>Taestivum_25,<br>Turartu_07 |

| Tip Name    | EST                                                                                                                                                                                                                                                                                                                                                                                                                                                                                                                                                                                                                                                                                                                                                                                                                                                                                                                                                                                                                                                                                                                                                                                                                                                        | NT         | Genomic                     |
|-------------|------------------------------------------------------------------------------------------------------------------------------------------------------------------------------------------------------------------------------------------------------------------------------------------------------------------------------------------------------------------------------------------------------------------------------------------------------------------------------------------------------------------------------------------------------------------------------------------------------------------------------------------------------------------------------------------------------------------------------------------------------------------------------------------------------------------------------------------------------------------------------------------------------------------------------------------------------------------------------------------------------------------------------------------------------------------------------------------------------------------------------------------------------------------------------------------------------------------------------------------------------------|------------|-----------------------------|
| Triticum_03 | AJ611563.1, AJ611608.1,<br>BE517987.1, BF483414.1,<br>BJ245521.1, BJ251405.1,<br>BJ281674.1, BJ286768.1,<br>BM135340.1, BQ744153.1,<br>BQ788692.1, BQ788939.1,<br>CD453589.1, CJ558947.1,<br>CJ561158.1, CJ561508.1,<br>CJ666219.1, CJ668379.1,<br>CJ668718.1, CJ670731.1,<br>CJ774086.1, CJ776063.1,<br>CJ782372.1, CJ785705.1,<br>CJ785802.1, CJ788035.1,<br>CJ800098.1, CJ802864.1,<br>CJ812927.1, CJ851388.1,<br>CJ854294.1, CJ856468.1,<br>CJ862882.1, CJ867055.1,<br>CJ869140.1, CJ880523.1,<br>CJ892522.1, CJ931854.1,<br>CJ944152.1, CJ947181.1,<br>CJ948255.1, CJ951307.1,<br>CJ956082.1, CJ959346.1,<br>CJ960332.1, CJ963289.1,<br>CJ967949.1, CK214973.1,<br>CK217856.1, CV763015.1,<br>CV764218.1, CV765166.1,<br>CV767594.1, CV772030.1,<br>DR738977.1, DR739576.1,<br>HX063273.1, HX066856.1,<br>HX066887.1, HX085457.1,<br>HX085490.1, HX093232.1,<br>HX129715.1, HX129740.1,<br>HX131240.1, HX131266.1,<br>HX135004.1, HX135032.1,<br>HX135505.1, HX141595.1,<br>HX141620.1, HX142502.1,<br>HX160163.1, HX160192.1,<br>HX164719.1, HX164744.1,<br>HX165229.1, HX165253.1,<br>HX169286.1, HX169312.1,<br>HX181395.1, HX194985.1,<br>HX197879.1, HX197902.1,<br>HX198440.1, HX198467.1,<br>HX199264.1, HX199285.1,<br>HX201646.1, HX201671.1 | AK331025.1 | Taestivum_12,<br>Turartu_06 |

| Tip Name             | EST                                                                                                                                                                                                                                                                                                                                                                                                  | NT                                       | Genomic                     |
|----------------------|------------------------------------------------------------------------------------------------------------------------------------------------------------------------------------------------------------------------------------------------------------------------------------------------------------------------------------------------------------------------------------------------------|------------------------------------------|-----------------------------|
| Triticum_04          | CJ713017.1, CJ725253.1,<br>DR738947.1                                                                                                                                                                                                                                                                                                                                                                | -                                        | Taestivum_01,<br>Turartu_09 |
| Vicia_faba_01        | HX903971.1                                                                                                                                                                                                                                                                                                                                                                                           | -                                        | -                           |
| Vicia_faba_02        | HX908502.1                                                                                                                                                                                                                                                                                                                                                                                           | -                                        | -                           |
| Vicia_faba_03        | HX904792.1, HX906607.1,<br>HX910721.1                                                                                                                                                                                                                                                                                                                                                                | -                                        | -                           |
| Vigna_angularis_01   | -                                                                                                                                                                                                                                                                                                                                                                                                    | -                                        | Vangulari_01                |
| Vigna_angularis_02   | -                                                                                                                                                                                                                                                                                                                                                                                                    | -                                        | Vangulari_02                |
| Vigna_angularis_03   | -                                                                                                                                                                                                                                                                                                                                                                                                    | -                                        | Vangulari_03                |
| Vigna_unguiculata_01 | FG831345.1, FG855444.1,<br>FG862850.1, FG876898.1,<br>FG890912.1, FG905198.1,<br>FG922188.1, FG933616.1                                                                                                                                                                                                                                                                                              | -                                        | -                           |
| Vigna_unguiculata_02 | FF384683.1, FG820166.1,<br>FG820167.1, FG822746.1,<br>FG822747.1, FG904065.1,<br>FG904066.1                                                                                                                                                                                                                                                                                                          | -                                        | -                           |
| Vigna_unguiculata_03 | FF387861.1, FF393331.1                                                                                                                                                                                                                                                                                                                                                                               | -                                        | -                           |
| Vigna_01             | FF390700.1, FF391881.1                                                                                                                                                                                                                                                                                                                                                                               | -                                        | Vangulari_04                |
| Vitis_vinifera_01    | CB971301.1, CB971379.1,<br>CB971712.1, CB971792.1,<br>EE090988.1, EE091145.1                                                                                                                                                                                                                                                                                                                         | XM_002275235.2,<br>XM_003631287.1        | Vvinifera_01                |
| Vitis_vinifera_02    | CF517014.1, EC949968.1,<br>EC956207.1, EC966936.1,<br>EE067827.1, EE073309.1,<br>EE075421.1, EE085818.1,<br>EE085819.1, FQ398871.1,<br>FQ401152.1, FQ401647.1,<br>FQ402530.1, FQ405462.1,<br>FQ405932.1, FQ410560.1,<br>FQ412815.1, FQ436505.1,<br>FQ437451.1, FQ441979.1,<br>FQ445037.1, FQ445959.1,<br>FQ456713.1, FQ457149.1,<br>FQ457897.1, FQ478200.1,<br>FQ478812.1, FQ479428.1,<br>FQ479646.1 | FQ390131.1,<br>FQ395263.1,<br>FQ395755.1 | -                           |
| Volvox_carteri_01    | -                                                                                                                                                                                                                                                                                                                                                                                                    | -                                        | Vcarteri_01                 |

| Tip Name              | EST                                                                                                                                                                                                                                                                                                                                                                                                                                                                                                              | NT                                                                         | Genomic     |
|-----------------------|------------------------------------------------------------------------------------------------------------------------------------------------------------------------------------------------------------------------------------------------------------------------------------------------------------------------------------------------------------------------------------------------------------------------------------------------------------------------------------------------------------------|----------------------------------------------------------------------------|-------------|
| Volvox_carteri_02     | FD805131.1, FD806574.1,<br>FD818800.1, FD825639.1,<br>FD827764.1, FD828354.1,<br>FD833126.1, FD833658.1,<br>FD835043.1, FD840627.1,<br>FD848229.1, FD905506.1,<br>FD908202.1, FD916973.1,<br>FD922208.1, FD927491.1,<br>FD930906.1                                                                                                                                                                                                                                                                               | AB034248.1,<br>XM_002946778.1,<br>XM_002946965.1                           | Vcarteri_02 |
| Wrightia_tinctoria_01 | HS563211.1, HS568506.1                                                                                                                                                                                                                                                                                                                                                                                                                                                                                           | -                                                                          | -           |
| Xerophyta_humilis_01  | JK689862.1                                                                                                                                                                                                                                                                                                                                                                                                                                                                                                       | -                                                                          | -           |
| Yucca_filamentosa_01  | DT580614.1                                                                                                                                                                                                                                                                                                                                                                                                                                                                                                       | -                                                                          | -           |
| Zea_mays_01           | AI770589.1, AI770873.1,<br>DN211529.1, DN224237.1,<br>FL204749.1, FL479180.1,<br>FL480373.1, FM195325.1                                                                                                                                                                                                                                                                                                                                                                                                          | AY105459.1,<br>EU963069.1,<br>NM_001156986.1                               | Zmays_02    |
| Zea_mays_02           | CF625213.1, EE681566.1,<br>FL153019.1, FL153022.1,<br>FL478795.1                                                                                                                                                                                                                                                                                                                                                                                                                                                 | NM_001157827.1                                                             | -           |
| Zea_mays_03           | BM079951.1, BM267242.1,<br>BM267253.1, BM335972.1,<br>BM340344.1, BM348991.1,<br>BM379354.1, CB350711.1,<br>CD438627.1, CF625647.1,<br>CK347665.1, CO457224.1,<br>CO458868.1, CO459248.1,<br>CO459272.1, CO465949.1,<br>DR790776.1, DR790777.1,<br>DV033416.1, EB705702.1,<br>EC888851.2, EC888852.2,<br>EC896491.1, EE039174.1,<br>EE185423.2, EE185424.2,<br>EE190895.2, FL145112.1,<br>FL145121.1, FL360470.1,<br>FL372616.1, FL380890.1,<br>FL381740.1, FL401476.1,<br>FL402946.1, FL408597.1,<br>FL415586.1 | AY107950.1,<br>BT019161.1,<br>EU965778.1,<br>EU967195.1,<br>NM_001137533.1 | Zmays_01    |

| Tip Name             | EST                                                                                                                                                                                                                                                                                                                                                                                                                                                                                                                                                                                                                                                                                                                                                                                                        | NT                                                             | Genomic      |
|----------------------|------------------------------------------------------------------------------------------------------------------------------------------------------------------------------------------------------------------------------------------------------------------------------------------------------------------------------------------------------------------------------------------------------------------------------------------------------------------------------------------------------------------------------------------------------------------------------------------------------------------------------------------------------------------------------------------------------------------------------------------------------------------------------------------------------------|----------------------------------------------------------------|--------------|
| Zea_mays_04          | AI677179.1, BG316961.1, BG462434.1, BG462435.1, BG518285.1, BI358846.1, BI359343.1, BI595826.1, CA403807.1, CD437965.1, CD440226.1, CD441108.1, CD448106.1, CD968353.1, CD983691.1, CD983719.1, CD984812.1, CF025494.1, CF025498.1, CF025536.1, CF025571.1, CF025838.1, CF026064.1, CF026076.1, CF026515.1, CF636717.1, CK786736.1, CO445653.1, CO452833.1, CO457895.1, CO464056.1, CO468328.1, CO519706.1, DR794797.1, DR794798.1, DR820163.1, DR824140.1, DR957872.1, DR959209.1, DR965520.1, DR968127.1, DR968128.1, DT947106.1, DT947107.1, DV495357.1, DV516184.1, EB405655.1, EB707821.1, EB707822.1, EC906010.2, EE021517.2, EE029839.2, EE029840.2, EE159849.2, EE159850.2, FL002949.1, FL002952.1, FL002955.1, FL002957.1, FL002962.1, FL024976.1, FL157433.1, FL157434.1, FL157435.1, GR421186.1 | AY107592.1, BT016738.1, EU962234.1, EU964116.1, NM_001137904.2 | Zmays_03     |
| Zea_mays_05          | -                                                                                                                                                                                                                                                                                                                                                                                                                                                                                                                                                                                                                                                                                                                                                                                                          | AY104404.2, BT083981.1, EU955694.1, EU959004.1, NM_001112600.1 | Zmays_06     |
| Zinnia_violacea_01   | -                                                                                                                                                                                                                                                                                                                                                                                                                                                                                                                                                                                                                                                                                                                                                                                                          | U19923.1                                                       | -            |
| Zinnia_violacea_02   | FM880519.1, FM880520.1, FM880521.1                                                                                                                                                                                                                                                                                                                                                                                                                                                                                                                                                                                                                                                                                                                                                                         | U19924.1                                                       | -            |
| Zizania_latifolia_01 | -                                                                                                                                                                                                                                                                                                                                                                                                                                                                                                                                                                                                                                                                                                                                                                                                          | -                                                              | Zlatifoli_04 |
| Zizania_latifolia_02 | -                                                                                                                                                                                                                                                                                                                                                                                                                                                                                                                                                                                                                                                                                                                                                                                                          | -                                                              | Zlatifoli_05 |
| Zizania_latifolia_03 | -                                                                                                                                                                                                                                                                                                                                                                                                                                                                                                                                                                                                                                                                                                                                                                                                          | -                                                              | Zlatifoli_06 |

| <b>Tip Name</b>      | <b>EST</b>             | <b>NT</b> | <b>Genomic</b>                |
|----------------------|------------------------|-----------|-------------------------------|
| Zizania_latifolia_04 | -                      | -         | Zlatifoli_07,<br>Zlatifoli_09 |
| Zostera_marina_01    | HS090062.1             | -         | -                             |
| Zostera_marina_02    | AM768153.1, AM768501.1 | -         | -                             |

Table S2: Genomes Examined

| Organism                              | Source                                     | Used <sup>1</sup> |
|---------------------------------------|--------------------------------------------|-------------------|
| <i>Abies sibirica</i>                 | Spruce Genome Project <sup>2</sup>         | No                |
| <i>Actinidia chinensis</i>            | NCBI                                       | Yes               |
| <i>Aegilops tauschii</i>              | NCBI                                       | Yes               |
| <i>Aethionema arabicum</i>            | NCBI                                       | Yes               |
| <i>Amborella trichopoda</i>           | Phytozome version 10.0.2 <sup>3</sup>      | Yes               |
| <i>Aquilaria agallochum</i>           | NCBI                                       | Yes               |
| <i>Aquilegia coerulea</i>             | Phytozome version 10.0.2                   | Yes               |
| <i>Arabidopsis halleri</i>            | Phytozome version 10.0.2                   | Yes               |
| <i>Arabidopsis lyrata</i>             | Phytozome version 10.0.2                   | Yes               |
| <i>Arabidopsis thaliana</i>           | Phytozome version 10.0.2                   | Yes               |
| <i>Auxenochlorella protothecoides</i> | NCBI                                       | No                |
| <i>Azadirachta indica</i>             | NCBI                                       | Yes               |
| <i>Azolla filiculoides</i>            | Fay-Wei Li, pers. comm.                    | No                |
| <i>Bathycoccus prasinos</i>           | NCBI BioProject (PRJNA233489) <sup>4</sup> | No                |
| <i>Beta vulgaris</i>                  | NCBI                                       | Yes               |
| <i>Betula nana</i>                    | Dwarf Birch Genome Project <sup>5</sup>    | No                |
| <i>Boechera stricta</i>               | Phytozome version 10.0.2                   | Yes               |
| <i>Brachypodium distachyon</i>        | Phytozome version 10.0.2                   | Yes               |
| <i>Brassica napus</i>                 | NCBI                                       | Yes               |
| <i>Brassica oleracea</i>              | NCBI                                       | Yes               |
| <i>Brassica rapa</i>                  | Phytozome version 10.0.2                   | Yes               |
| <i>Cajanus cajan</i>                  | NCBI BioProject (PRJNA72815) <sup>6</sup>  | Yes               |
| <i>Camelina sativa</i>                | NCBI                                       | Yes               |
| <i>Cannabis sativa</i>                | NCBI                                       | Yes               |
| <i>Capsella grandiflora</i>           | Phytozome version 10.0.2                   | Yes               |
| <i>Capsella rubella</i>               | Phytozome version 10.0.2                   | Yes               |
| <i>Capsicum annuum</i>                | SGN <sup>7</sup>                           | No                |
| <i>Capsicum chinense</i>              | SGN                                        | Yes               |
| <i>Carica papaya</i>                  | Phytozome version 10.0.2                   | Yes               |
| <i>Chlamydomonas reinhardtii</i>      | Phytozome version 10.0.2                   | Yes               |
| <i>Chlorella variabilis</i>           | JGI Genome Portal <sup>8</sup>             | No                |
| <i>Chondrus crispus</i>               | NCBI                                       | No                |
| <i>Cicer arietinum</i>                | NCBI                                       | Yes               |
| <i>Citrullus lanatus</i>              | Cucurbit Genomics Database <sup>9</sup>    | Yes               |
| <i>Citrus clementina</i>              | Phytozome version 10.0.2                   | Yes               |

<sup>1</sup>At least one complete RNase sequence without ambiguities and premature stop codons was found.

<sup>2</sup><http://congenie.org/start>

<sup>3</sup><http://phytozome.jgi.doe.gov/pz/portal.html>

<sup>4</sup><http://www.ncbi.nlm.nih.gov/bioproject/PRJNA233489>

<sup>5</sup><http://www.birchgenome.org>

<sup>6</sup><http://www.ncbi.nlm.nih.gov/bioproject?term=PRJNA72815>

<sup>7</sup><ftp://ftp.solgenomics.net/genomes>

<sup>8</sup><http://genome.jgi.doe.gov>

<sup>9</sup><ftp://www.icugi.org/pub/genome/watermelon>

| Organism                          | Source                                                      | Used |
|-----------------------------------|-------------------------------------------------------------|------|
| <i>Citrus sinensis</i>            | Phytozome version 10.0.2                                    | Yes  |
| <i>Cleome hassleriana</i>         | NCBI                                                        | Yes  |
| <i>Coccomyxa subellipsoidea</i>   | Phytozome version 10.0.2                                    | No   |
| <i>Coffea canephora</i>           | Coffee Genome Hub <sup>10</sup>                             | Yes  |
| <i>Cucumis melo</i>               | NCBI                                                        | Yes  |
| <i>Cucumis sativus</i>            | Phytozome version 10.0.2                                    | Yes  |
| <i>Cyanidioschyzon merolae</i>    | <i>Cyanidioschyzon merolae</i> Genome Project <sup>11</sup> | No   |
| <i>Cyanophora paradoxa</i>        | <i>Cyanophora</i> Genome Project <sup>12</sup>              | No   |
| <i>Dianthus caryophyllus</i>      | NCBI                                                        | Yes  |
| <i>Ectocarpus siliculosus</i>     | NCBI BioProject (PRJEA42625) <sup>13</sup>                  | No   |
| <i>Elaeis guineensis</i>          | NCBI                                                        | Yes  |
| <i>Elaeis oleifera</i>            | NCBI                                                        | Yes  |
| <i>Ensete ventricosum</i>         | NCBI                                                        | Yes  |
| <i>Eucalyptus camaldulensis</i>   | NCBI                                                        | Yes  |
| <i>Eucalyptus grandis</i>         | Phytozome version 10.0.2                                    | Yes  |
| <i>Eutrema salsugineum</i>        | Phytozome version 10.0.2                                    | Yes  |
| <i>Fragaria iinumae</i>           | NCBI                                                        | Yes  |
| <i>Fragaria nipponica</i>         | NCBI                                                        | Yes  |
| <i>Fragaria nubicola</i>          | NCBI                                                        | Yes  |
| <i>Fragaria orientalis</i>        | NCBI                                                        | Yes  |
| <i>Fragaria vesca</i>             | Phytozome version 10.0.2                                    | Yes  |
| <i>Fragaria</i> × <i>ananassa</i> | NCBI                                                        | Yes  |
| <i>Fraxinus excelsior</i>         | NCBI                                                        | Yes  |
| <i>Galdieria sulphuraria</i>      | NCBI                                                        | No   |
| <i>Genlisea aurea</i>             | NCBI                                                        | No   |
| <i>Glycine max</i>                | Phytozome version 10.0.2                                    | Yes  |
| <i>Gnetum gnemon</i>              | Spruce Genome Project                                       | No   |
| <i>Gossypium arboreum</i>         | CottonGen <sup>14</sup>                                     | Yes  |
| <i>Gossypium raimondii</i>        | Phytozome version 10.0.2                                    | Yes  |
| <i>Hevea brasiliensis</i>         | NCBI                                                        | Yes  |
| <i>Hordeum pubiflorum</i>         | NCBI                                                        | Yes  |
| <i>Hordeum vulgare</i>            | Ensembl Plants <sup>15</sup>                                | Yes  |
| <i>Jatropha curcas</i>            | NCBI                                                        | Yes  |
| <i>Juniperus communis</i>         | Spruce Genome Project                                       | No   |
| <i>Klebsormidium flaccidum</i>    | NCBI                                                        | No   |
| <i>Lactuca sativa</i>             | NCBI                                                        | Yes  |
| <i>Lagenaria siceraria</i>        | NCBI                                                        | Yes  |
| <i>Leavenworthia alabamica</i>    | NCBI                                                        | Yes  |

<sup>10</sup><http://coffee-genome.org/coffeacanephora>

<sup>11</sup><http://merolae.biol.s.u-tokyo.ac.jp/download>

<sup>12</sup><http://cyanophora.rutgers.edu/cyanophora/blast.php>

<sup>13</sup><http://www.ncbi.nlm.nih.gov/bioproject/PRJEA42625>

<sup>14</sup>[ftp://ftp.bioinfo.wsu.edu/www.cottongen.org/Gossypium\\_arboreum](ftp://ftp.bioinfo.wsu.edu/www.cottongen.org/Gossypium_arboreum)

<sup>15</sup><ftp://ftp.ensemblgenomes.org/pub/plants/release-22>



| Organism                         | Source                                      | Used              |
|----------------------------------|---------------------------------------------|-------------------|
| <i>Leersia perrieri</i>          | NCBI                                        | Yes               |
| <i>Linum usitatissimum</i>       | Phytozome version 10.0.2                    | Yes               |
| <i>Lotus japonicus</i>           | Kazusa DNA Research Institute <sup>16</sup> | No                |
| <i>Lupinus angustifolius</i>     | NCBI                                        | Yes               |
| <i>Malus × domestica</i>         | Phytozome version 10.0.2                    | Yes               |
| <i>Manihot esculenta</i>         | Phytozome version 10.0.2                    | No                |
| <i>Marchantia polymorpha</i>     | Phytozome version 12                        | Yes <sup>17</sup> |
| <i>Medicago truncatula</i>       | Phytozome version 10.0.2                    | Yes               |
| <i>Micromonas pusilla</i>        | Phytozome version 10.0.2                    | No                |
| <i>Mimulus guttatus</i>          | Phytozome version 10.0.2                    | Yes               |
| <i>Morus notabilis</i>           | NCBI                                        | Yes               |
| <i>Musa acuminata</i>            | NCBI                                        | Yes               |
| <i>Musa balbisiana</i>           | Banana Genome Hub <sup>18</sup>             | Yes               |
| <i>Nelumbo nucifera</i>          | NCBI                                        | Yes               |
| <i>Nicotiana benthamiana</i>     | SGN                                         | Yes               |
| <i>Nicotiana otophora</i>        | NCBI                                        | Yes               |
| <i>Nicotiana sylvestris</i>      | NCBI                                        | Yes               |
| <i>Nicotiana tabacum</i>         | SGN                                         | No                |
| <i>Nicotiana tomentosiformis</i> | NCBI                                        | Yes               |
| <i>Oryza barthii</i>             | NCBI                                        | Yes               |
| <i>Oryza brachyantha</i>         | NCBI                                        | Yes               |
| <i>Oryza glaberrima</i>          | NCBI                                        | Yes               |
| <i>Oryza glumipatula</i>         | NCBI                                        | Yes               |
| <i>Oryza meridionalis</i>        | NCBI                                        | Yes               |
| <i>Oryza nivara</i>              | NCBI                                        | Yes               |
| <i>Oryza punctata</i>            | NCBI                                        | Yes               |
| <i>Oryza sativa</i>              | Phytozome version 10.0.2                    | Yes               |
| <i>Ostreococcus lucimarinus</i>  | Phytozome version 10.0.2                    | No                |
| <i>Ostreococcus sp. RCC809</i>   | JGI Genome Portal                           | No                |
| <i>Ostreococcus tauri</i>        | JGI Genome Portal                           | No                |
| <i>Panicum hallii</i>            | Phytozome version 10.0.2                    | Yes               |
| <i>Panicum virgatum</i>          | Phytozome version 10.0.2                    | Yes               |
| <i>Phaseolus vulgaris</i>        | Phytozome version 10.0.2                    | Yes               |
| <i>Phoenix dactylifera</i>       | NCBI                                        | Yes               |
| <i>Phyllostachys edulis</i>      | NCGR <sup>19</sup>                          | Yes               |
| <i>Physcomitrella patens</i>     | Phytozome version 10.0.2                    | Yes               |
| <i>Picea abies</i>               | Spruce Genome Project                       | Yes               |
| <i>Pinus sylvestris</i>          | Spruce Genome Project                       | No                |
| <i>Pinus taeda</i>               | Conifer Genome Network <sup>20</sup>        | Yes               |

<sup>16</sup><http://www.kazusa.or.jp/lotus>

<sup>17</sup>Genome was searched after the principal analyses were completed. Sequences not on tree.

<sup>18</sup><http://banana-genome.cirad.fr/content/musa-balbisiana-pisang-klutuk-wulung>

<sup>19</sup><http://202.127.18.221/bamboo>

<sup>20</sup><http://www.pinegenome.org/pinerefseq>

| Organism                          | Source                                                     | Used |
|-----------------------------------|------------------------------------------------------------|------|
| <i>Populus euphratica</i>         | NCBI                                                       | Yes  |
| <i>Populus grandidentata</i>      | Dendrome <sup>21</sup>                                     | Yes  |
| <i>Populus tremula</i>            | Dendrome                                                   | Yes  |
| <i>Populus tremuloides</i>        | Dendrome                                                   | Yes  |
| <i>Populus trichocarpa</i>        | Phytozome version 10.0.2                                   | Yes  |
| <i>Porphyridium purpureum</i>     | <i>Porphyridium purpureum</i> Genome Project <sup>22</sup> | No   |
| <i>Prunus mume</i>                | NCBI                                                       | Yes  |
| <i>Prunus persica</i>             | Phytozome version 10.0.2                                   | Yes  |
| <i>Pyrus communis</i>             | Genome Database for Rosaceae <sup>23</sup>                 | Yes  |
| <i>Pyrus × bretschneideri</i>     | NCBI                                                       | Yes  |
| <i>Raphanus sativus</i>           | NCBI                                                       | Yes  |
| <i>Ricinus communis</i>           | Phytozome version 10.0.2                                   | Yes  |
| <i>Salvinia cucullata</i>         | Fay-Wei Li, pers. comm.                                    | No   |
| <i>Selaginella moellendorffii</i> | Phytozome version 10.0.2                                   | Yes  |
| <i>Sesamum indicum</i>            | NCBI                                                       | Yes  |
| <i>Setaria italica</i>            | Phytozome version 10.0.2                                   | Yes  |
| <i>Sisymbrium irio</i>            | NCBI                                                       | Yes  |
| <i>Solanum arcanum</i>            | NCBI                                                       | Yes  |
| <i>Solanum habrochaites</i>       | NCBI                                                       | Yes  |
| <i>Solanum lycopersicum</i>       | Phytozome version 10.0.2                                   | Yes  |
| <i>Solanum pennellii</i>          | ENA <sup>24</sup> (HG975439 to HG975452)                   | Yes  |
| <i>Solanum pimpinellifolium</i>   | SGN                                                        | Yes  |
| <i>Solanum tuberosum</i>          | Phytozome version 10.0.2                                   | Yes  |
| <i>Sorghum bicolor</i>            | Phytozome version 10.0.2                                   | Yes  |
| <i>Spinacia oleracea</i>          | NCBI                                                       | Yes  |
| <i>Spirodela polyrhiza</i>        | Phytozome version 10.0.2                                   | No   |
| <i>Taxus baccata</i>              | Spruce Genome Project                                      | Yes  |
| <i>Thellungiella parvula</i>      | NCBI <sup>25</sup>                                         | Yes  |
| <i>Theobroma cacao</i>            | Phytozome version 10.0.2                                   | Yes  |
| <i>Trifolium pratense</i>         | NCBI                                                       | Yes  |
| <i>Triticum aestivum</i>          | Ensembl Plants                                             | Yes  |
| <i>Triticum urartu</i>            | NCBI                                                       | Yes  |
| <i>Vigna angularis</i>            | NCBI                                                       | Yes  |
| <i>Vitis vinifera</i>             | Phytozome version 10.0.2                                   | Yes  |
| <i>Volvox carteri</i>             | Phytozome version 10.0.2                                   | Yes  |
| <i>Zea mays</i>                   | Phytozome version 10.0.2                                   | Yes  |
| <i>Zizania latifolia</i>          | NCBI                                                       | Yes  |

<sup>21</sup><http://dendrome.ucdavis.edu>

<sup>22</sup><http://cyanophora.rutgers.edu/porphyridium>

<sup>23</sup>[http://www.rosaceae.org/species/pyrus/pyrus\\_communis](http://www.rosaceae.org/species/pyrus/pyrus_communis)

<sup>24</sup>European Nucleotide Archive: <http://www.ebi.ac.uk/ena>

<sup>25</sup><http://www.ncbi.nlm.nih.gov/nuccore/AFAN00000000.1>

Table S3: Studies of Expression Patterns and Function of T2/S-RNases

| Class | Gene                          | Protein            | Tip Name                   | References                                                                                                                                                                                                                                 |
|-------|-------------------------------|--------------------|----------------------------|--------------------------------------------------------------------------------------------------------------------------------------------------------------------------------------------------------------------------------------------|
| I     | <i>av-1</i>                   | AV-I               | Aldrovanda_vesiculosa_01   | <a href="#">Nishimura et al. 2014</a>                                                                                                                                                                                                      |
| I     | <i>cf-1</i>                   | CF-I               | Cephalotus_follicularis_01 | <a href="#">Nishimura et al. 2013</a>                                                                                                                                                                                                      |
| I     | <i>da-1</i>                   | DA-I               | Drosera_adelae_01          | <a href="#">Okabe et al. 2005</a><br><a href="#">Arai et al. 2015</a>                                                                                                                                                                      |
| I     | <i>dm-1</i>                   | DM-I               | Dionaea_muscipula_01       | <a href="#">Nishimura et al. 2013</a>                                                                                                                                                                                                      |
| I     | <i>GAR-RNase</i>              | GAR-RNase          | Hordeum_04                 | <a href="#">Rogers &amp; Rogers 1999</a>                                                                                                                                                                                                   |
| I     | <i>nb-1</i>                   | NB-I               | Nepenthes_bicalcarata_01   | <a href="#">Nishimura et al. 2014</a>                                                                                                                                                                                                      |
| I     | <i>NGR1</i>                   | RNase NW           | Nicotiana_03               | <a href="#">Kariu et al. 1998</a>                                                                                                                                                                                                          |
| I     | <i>NGR3</i>                   | RNase NT           | Nicotiana_01               | <a href="#">Hino, Kawano &amp; Kimura 2002</a><br><a href="#">Kurata et al. 2002</a><br><a href="#">Kawano et al. 2006</a>                                                                                                                 |
| I     | <i>non-S-RNase</i>            | non-S-RNase        | Pyrus_03                   | <a href="#">Norioka et al. 1996</a>                                                                                                                                                                                                        |
| I     | <i>OsRNS1</i>                 | OsRNS1             | Oryza_02                   | <a href="#">MacIntosh et al. 2010</a>                                                                                                                                                                                                      |
| I     | <i>OsRNS3</i>                 | RNase OS<br>OsRNS3 | Oryza_01                   | <a href="#">Iwama et al. 2001</a><br><a href="#">MacIntosh et al. 2010</a>                                                                                                                                                                 |
| I     | <i>OsRRP</i><br><i>OsRNS4</i> | OsRRP<br>OsRNS4    | Oryza_07                   | <a href="#">Ohkama-Ohtsu et al. 2004</a><br><a href="#">Wei et al. 2006</a><br><a href="#">MacIntosh et al. 2010</a><br><a href="#">Zheng et al. 2014</a>                                                                                  |
| I     | <i>OsRNS5</i>                 | OsRNS5             | Oryza_08                   | <a href="#">MacIntosh et al. 2010</a>                                                                                                                                                                                                      |
| I     | <i>OsRNS7</i>                 | OsRNS7             | Oryza_05                   | <a href="#">MacIntosh et al. 2010</a>                                                                                                                                                                                                      |
| I     | <i>OsRNS8</i>                 | OsRNS8             | Oryza_06                   | <a href="#">MacIntosh et al. 2010</a>                                                                                                                                                                                                      |
| I     | <i>PD1</i>                    | RNase PD1          | Prunus_01                  | <a href="#">Van Nerum et al. 2000</a>                                                                                                                                                                                                      |
| I     | <i>Phy1</i>                   | Phy1               | Petunia_x_hybrida_03       | <a href="#">Hillwig et al. 2010</a>                                                                                                                                                                                                        |
| I     | <i>RNaseLE</i>                | RNase LE           | Solanum_05                 | <a href="#">Nürnberg et al. 1990</a><br><a href="#">Jost et al. 1991</a><br><a href="#">Lers et al. 1998</a><br><a href="#">Tanaka et al. 2000</a><br><a href="#">Groß, Wasternack &amp; Köck 2004</a><br><a href="#">Köck et al. 2004</a> |
| I     | <i>RNaseLX</i>                | RNase LX           | Solanum_06                 | <a href="#">Löffler et al. 1992</a><br><a href="#">Lers et al. 1998</a><br><a href="#">Köck, Stenzel &amp; Zimmer 2006</a><br><a href="#">Lers et al. 2006</a>                                                                             |
| I     | <i>RNaseNE</i>                | RNase NE           | Nicotiana_04               | <a href="#">Dodds, Clarke &amp; Newbiggin 1996</a><br><a href="#">Hugot et al. 2002</a>                                                                                                                                                    |
| I     | <i>RNasePD2</i>               | RNase PD2          | Prunus_08                  | <a href="#">Ma &amp; Oliveira 2000</a>                                                                                                                                                                                                     |

| <b>Class</b> | <b>Gene</b>                          | <b>Protein</b>         | <b>Tip Name</b>           | <b>References</b>                                                                                                                                                                                                                                           |
|--------------|--------------------------------------|------------------------|---------------------------|-------------------------------------------------------------------------------------------------------------------------------------------------------------------------------------------------------------------------------------------------------------|
| I            | <i>RNS1</i>                          | RNS1                   | Arabidopsis_02            | <a href="#">Bariola et al. 1994</a><br><a href="#">Bariola, MacIntosh &amp; Green 1999</a><br><a href="#">LeBrasseur et al. 2002</a><br><a href="#">Hillwig et al. 2008</a><br><a href="#">Hillwig et al. 2011</a><br><a href="#">Nishimura et al. 2014</a> |
| I            | <i>RNS3</i>                          | RNS3                   | Arabidopsis_04            | <a href="#">Bariola et al. 1994</a><br><a href="#">Hillwig et al. 2011</a>                                                                                                                                                                                  |
| I            | <i>rsh1</i>                          | RSH1                   | Hordeum_03                | <a href="#">Gausung 2000</a>                                                                                                                                                                                                                                |
| I            | <i>sl-I</i>                          | SL-I                   | Sarracenia_leucophylla_01 | <a href="#">Nishimura et al. 2014</a>                                                                                                                                                                                                                       |
| I            | <i>ZRNaseI</i>                       | ZRNaseI                | Zinnia_violacea_01        | <a href="#">Ye &amp; Droste 1996</a>                                                                                                                                                                                                                        |
| I            | <i>ZRNaseII</i>                      | ZRNaseII               | Zinnia_violacea_02        | <a href="#">Ye &amp; Droste 1996</a>                                                                                                                                                                                                                        |
| II           | <i>AhSL28</i>                        | AhSL28                 | Antirrhinum_hispanicum_05 | <a href="#">Liang et al. 2002</a>                                                                                                                                                                                                                           |
| II           | <i>CalsepRRP</i>                     | CalsepRRP              | Calystegia_sepium_01      | <a href="#">Van Damme et al. 2000</a><br><a href="#">Rabijns et al. 2002</a>                                                                                                                                                                                |
| II           | <i>CgSL2</i>                         | CgSL2                  | Citrus_04                 | <a href="#">Chai et al. 2011</a>                                                                                                                                                                                                                            |
| II           | <i>NGR2</i>                          | NGR2                   | Nicotiana_02              | <a href="#">Kurata et al. 2002</a>                                                                                                                                                                                                                          |
| II           | <i>OsRNS2</i>                        | OsRNS2                 | Oryza_03                  | <a href="#">MacIntosh et al. 2010</a>                                                                                                                                                                                                                       |
| II           | <i>OsRNS6</i>                        | OsRNS6                 | Oryza_04                  | <a href="#">MacIntosh et al. 2010</a>                                                                                                                                                                                                                       |
| II           | <i>RNaseLER</i>                      | RNase LER              | Solanum_07                | <a href="#">Köthke &amp; Köck 2011</a>                                                                                                                                                                                                                      |
| II           | <i>RNS2</i>                          | RNS2                   | Arabidopsis_03            | <a href="#">Taylor et al. 1993</a><br><a href="#">Bariola, MacIntosh &amp; Green 1999</a><br><a href="#">Hillwig et al. 2011</a>                                                                                                                            |
| III          | <i>AhRNase29</i>                     | AhRNase29              | Antirrhinum_hispanicum_06 | <a href="#">Liang, Huang &amp; Xue 2003</a>                                                                                                                                                                                                                 |
| III          | <i>GMP</i>                           | GMP                    | Panax_01                  | <a href="#">Kim et al. 2004</a>                                                                                                                                                                                                                             |
| III          | <i>non-S63-RNase</i><br><i>NnSR1</i> | non-S63-RNase<br>NnSR1 | Nicotiana_alata_06        | <a href="#">Roldán, Quiroga &amp; Goldraj 2010</a><br><a href="#">Rojas, Roldán &amp; Goldraj 2013</a>                                                                                                                                                      |
| III          | <i>p43</i>                           | P43                    | Pisum_sativum_01          | <a href="#">Gaikwad et al. 1999</a>                                                                                                                                                                                                                         |
| III          | <i>Phy3</i>                          | Phy3                   | Petunia_x_hybrida_02      | <a href="#">Hillwig et al. 2010</a>                                                                                                                                                                                                                         |
| III          | <i>Phy4</i>                          | Phy4                   | Petunia_x_hybrida_01      | <a href="#">Hillwig et al. 2010</a>                                                                                                                                                                                                                         |

## References

- Arai N, Nishimura E, Kikuchi Y, Ohyama T. 2015. Functional analyses of carnivorous plant-specific amino acid residues in S-like ribonucleases. *Biochemical and Biophysical Research Communications* **465**:108–112. doi:[10.1016/j.bbrc.2015.07.139](https://doi.org/10.1016/j.bbrc.2015.07.139).
- Bariola PA, Howard CJ, Taylor CB, Verburg MT, Jaglan VD, Green PJ. 1994. The *Arabidopsis* ribonuclease gene *RNS1* is tightly controlled in response to phosphate limitation. *The Plant Journal* **6**:673–685. doi:[10.1046/j.1365-3113X.1994.6050673.x](https://doi.org/10.1046/j.1365-3113X.1994.6050673.x).
- Bariola PA, MacIntosh GC, Green PJ. 1999. Regulation of S-like ribonuclease levels in *Arabidopsis*. Antisense inhibition of *RNS1* or *RNS2* elevates anthocyanin accumulation. *Plant Physiology* **119**:331–342. doi:[10.1104/pp.119.1.331](https://doi.org/10.1104/pp.119.1.331).
- Chai L, Ge X, Xu Q, Deng X. 2011. *CgSL2*, an S-like RNase gene in ‘Zigui shatian’ pummelo (*Citrus grandis* Osbeck), is involved in ovary senescence. *Molecular Biology Reports* **38**:1–8. doi:[10.1007/s11033-010-0070-x](https://doi.org/10.1007/s11033-010-0070-x).
- Dodds PN, Clarke AE, Newbigin E. 1996. Molecular characterisation of an S-like RNase of *Nicotiana glauca* that is induced by phosphate starvation. *Plant Molecular Biology* **31**:227–238. doi:[10.1007/BF00021786](https://doi.org/10.1007/BF00021786).
- Gaikwad A, Tewari KK, Kumar D, Chen W, Mukherjee SK. 1999. Isolation and characterisation of the cDNA encoding a glycosylated accessory protein of pea chloroplast DNA polymerase. *Nucleic Acids Research* **27**:3120–3129. doi:[10.1093/nar/27.15.3120](https://doi.org/10.1093/nar/27.15.3120).
- Gausing K. 2000. A barley gene (*rsh1*) encoding a ribonuclease S-like homologue specifically expressed in young light-grown leaves. *Planta* **210**:574–579. doi:[10.1007/s004250050046](https://doi.org/10.1007/s004250050046).
- Groß N, Wasternack C, Köck M. 2004. Wound-induced *RNaseLE* expression is jasmonate and systemin independent and occurs only locally in tomato (*Lycopersicon esculentum* cv. Lukullus). *Phytochemistry* **65**:1343–1350. doi:[10.1016/j.phytochem.2004.04.036](https://doi.org/10.1016/j.phytochem.2004.04.036).
- Hillwig MS, Contento AL, Meyer A, Ebany D, Bassham DC, MacIntosh GC. 2011. RNS2, a conserved member of the RNase T2 family, is necessary for ribosomal RNA decay in plants. *Proceedings of the National Academy of Sciences* **108**:1093–1098. doi:[10.1073/pnas.1009809108](https://doi.org/10.1073/pnas.1009809108).
- Hillwig MS, LeBrasseur ND, Green PJ, MacIntosh GC. 2008. Impact of transcriptional, ABA-dependent, and ABA-independent pathways on wounding regulation of *RNS1* expression. *Molecular Genetics and Genomics* **280**:249. doi:[10.1007/s00438-008-0360-3](https://doi.org/10.1007/s00438-008-0360-3).
- Hillwig MS, Liu X, Liu G, Thornburg RW, MacIntosh GC. 2010. *Petunia* nectar proteins have ribonuclease activity. *Journal of Experimental Botany* **61**:2951–2965. doi:[10.1093/jxb/erq119](https://doi.org/10.1093/jxb/erq119).
- Hino M, Kawano S, Kimura M. 2002. Expression of *Nicotiana glutinosa* ribonucleases in *Escherichia coli*. *Bioscience, Biotechnology, and Biochemistry* **66**:910–912. doi:[10.1271/bbb.66.910](https://doi.org/10.1271/bbb.66.910).
- Hugot K, Ponchet M, Marais A, Ricci P, Galiana E. 2002. A tobacco S-like RNase inhibits hyphal elongation of plant pathogens. *Molecular plant-microbe interactions* **15**:243–250. doi:[10.1094/MPMI.2002.15.3.243](https://doi.org/10.1094/MPMI.2002.15.3.243).

- Iwama M, Ogawa Y, Yamagishi M, Itagaki T, Inokuchi N, Koyama T, Imai R, Ohgi K, Tsuji T, Irie M. 2001.** Amino acid sequence and characterization of a rice bran ribonuclease. *Biological and Pharmaceutical Bulletin* **24**:760–766. doi:[10.1248/bpb.24.760](https://doi.org/10.1248/bpb.24.760).
- Jost W, Bak H, Glund K, Terpstra P, Beintema JJ. 1991.** Amino acid sequence of an extracellular, phosphate-starvation-induced ribonuclease from cultured tomato (*Lycopersicon esculentum*) cells. *European Journal of Biochemistry* **198**:1–6. doi:[10.1111/j.1432-1033.1991.tb15978.x](https://doi.org/10.1111/j.1432-1033.1991.tb15978.x).
- Kariu T, Sano K, Shimokawa H, Itoh R, Yamasaki N, Kimura M. 1998.** Isolation and characterization of a wound-inducible ribonuclease from *Nicotiana glutinosa* leaves. *Bioscience, Biotechnology, and Biochemistry* **62**:1144–1151. doi:[10.1271/bbb.62.1144](https://doi.org/10.1271/bbb.62.1144).
- Kawano S, Kakuta Y, Nakashima T, Kimura M. 2006.** Crystal structures of the *Nicotiana glutinosa* ribonuclease NT in complex with nucleoside monophosphates. *The Journal of Biochemistry* **140**:375–381. doi:[10.1093/jb/mvj164](https://doi.org/10.1093/jb/mvj164).
- Kim SI, Kweon SM, Kim EA, Kim JY, Kim S, Yoo JS, Park YM. 2004.** Characterization of RNase-like major storage protein from the ginseng root by proteomic approach. *Journal of Plant Physiology* **161**:837–845. doi:[10.1016/j.jplph.2004.01.001](https://doi.org/10.1016/j.jplph.2004.01.001).
- Köck M, Groß N, Stenzel I, Hause G. 2004.** Phloem-specific expression of the wound-inducible Ribonuclease LE from tomato (*Lycopersicon esculentum* cv. *Lukullus*). *Planta* **219**:233–242. doi:[10.1007/s00425-004-1227-4](https://doi.org/10.1007/s00425-004-1227-4).
- Köck M, Stenzel I, Zimmer A. 2006.** Tissue-specific expression of tomato Ribonuclease LX during phosphate starvation-induced root growth. *Journal of Experimental Botany* **57**:3717. doi:[10.1093/jxb/erl124](https://doi.org/10.1093/jxb/erl124).
- Köthke S, Köck M. 2011.** The *Solanum lycopersicum* RNaseLER is a class II enzyme of the RNase T2 family and shows preferential expression in guard cells. *Journal of Plant Physiology* **168**:840–847. doi:[10.1016/j.jplph.2010.11.012](https://doi.org/10.1016/j.jplph.2010.11.012).
- Kurata N, Kariu T, Kawano S, Kimura M. 2002.** Molecular cloning of cDNAs encoding ribonuclease-related proteins in *Nicotiana glutinosa* leaves, as induced in response to wounding or to TMV-infection. *Bioscience, Biotechnology, and Biochemistry* **66**:391–397. doi:[10.1271/bbb.66.391](https://doi.org/10.1271/bbb.66.391).
- LeBrasseur ND, MacIntosh GC, Pérez-Amador MA, Saitoh M, Green PJ. 2002.** Local and systemic wound-induction of RNase and nuclease activities in *Arabidopsis*: RNS1 as a marker for a JA-independent systemic signaling pathway. *The Plant Journal* **29**:393–403. doi:[10.1046/j.1365-313x.2002.01223.x](https://doi.org/10.1046/j.1365-313x.2002.01223.x).
- Lers A, Khalchitski A, Lomaniec E, Burd S, Green PJ. 1998.** Senescence-induced RNases in tomato. *Plant Molecular Biology* **36**:439–449. doi:[10.1023/A:1005993024161](https://doi.org/10.1023/A:1005993024161).
- Lers A, Sonogo L, Green PJ, Burd S. 2006.** Suppression of LX ribonuclease in tomato results in a delay of leaf senescence and abscission. *Plant Physiology* **142**:710–721. doi:[10.1104/pp.106.080135](https://doi.org/10.1104/pp.106.080135).
- Liang L, Huang J, Xue Y. 2003.** Identification and evolutionary analysis of a relic *S-RNase* in *Antirrhinum*. *Sexual Plant Reproduction* **16**:17–22. doi:[10.1007/s00497-003-0168-6](https://doi.org/10.1007/s00497-003-0168-6).
- Liang L, Lai Z, Ma W, Zhang Y, Xue Y. 2002.** *AhSL28*, a senescence-and phosphate starvation-induced S-like RNase gene in *Antirrhinum*. *Biochimica et Biophysica Acta (BBA) - Gene Structure and Expression* **1579**:64–71. doi:[10.1016/S0167-4781\(02\)00507-9](https://doi.org/10.1016/S0167-4781(02)00507-9).

- Löffler A, Abel S, Jost W, Beintema JJ, Glund K. 1992.** Phosphate-regulated induction of intracellular ribonucleases in cultured tomato (*Lycopersicon esculentum*) cells. *Plant Physiology* **98**:1472–1478. doi:[10.1104/pp.98.4.1472](https://doi.org/10.1104/pp.98.4.1472).
- Ma RC, Oliveira MM. 2000.** The *RNase PD2* gene of almond (*Prunus dulcis*) represents an evolutionarily distinct class of S-like RNase genes. *Molecular and General Genetics* **263**:925–933. doi:[10.1007/s004380000258](https://doi.org/10.1007/s004380000258).
- MacIntosh GC, Hillwig MS, Meyer A, Flagel L. 2010.** RNase T2 genes from rice and the evolution of secretory ribonucleases in plants. *Molecular Genetics and Genomics* **283**:381–396. doi:[10.1007/s00438-010-0524-9](https://doi.org/10.1007/s00438-010-0524-9).
- Nishimura E, Jumyo S, Arai N, Kanna K, Kume M, Nishikawa Ji, Tanase Ji, Ohyama T. 2014.** Structural and functional characteristics of S-like ribonucleases from carnivorous plants. *Planta* **240**:147–159. doi:[10.1007/s00425-014-2072-8](https://doi.org/10.1007/s00425-014-2072-8).
- Nishimura E, Kawahara M, Kodaira R, Kume M, Arai N, Nishikawa Ji, Ohyama T. 2013.** S-like ribonuclease gene expression in carnivorous plants. *Planta* **238**:955–967. doi:[10.1007/s00425-013-1945-6](https://doi.org/10.1007/s00425-013-1945-6).
- Norioka N, Norioka S, Ohnishi Y, Ishimizu T, Oneyama C, Nakanishi T, Sakiyama F. 1996.** Molecular cloning and nucleotide sequences of cDNAs encoding S-allele specific stylar RNases in a self-incompatible cultivar and its self-compatible mutant of Japanese pear, *Pyrus pyrifolia* Nakai. *The Journal of Biochemistry* **120**:335. doi:[10.1093/oxfordjournals.jbchem.a021418](https://doi.org/10.1093/oxfordjournals.jbchem.a021418).
- Nürnberg T, Abel S, Jost W, Glund K. 1990.** Induction of an extracellular ribonuclease in cultured tomato cells upon phosphate starvation. *Plant Physiology* **92**:970–976. doi:[10.1104/pp.92.4.970](https://doi.org/10.1104/pp.92.4.970).
- Ohkama-Ohtsu N, Kishimoto N, Yazaki J, Fujii F, Shinbo K, Shimatani Z, Nagata Y, Hashimoto A, Ohta T, Sato Y, Honda S, Yamamoto K, Sakata K, Sasaki T, Kikuchi S, Hayashi H, Yoneyama T, Fujiwara T. 2004.** Upregulation of the genes for ferritin, RNase, and DnaJ in leaves of rice plants in response to sulfur deficiency. *Soil Science and Plant Nutrition* **50**:771–775. doi:[10.1080/00380768.2004.10408534](https://doi.org/10.1080/00380768.2004.10408534).
- Okabe T, Iwakiri Y, Mori H, Ogawa T, Ohyama T. 2005.** An S-like ribonuclease gene is used to generate a trap-leaf enzyme in the carnivorous plant *Drosera adelae*. *FEBS Letters* **579**:5729–5733. doi:[10.1016/j.febslet.2005.09.043](https://doi.org/10.1016/j.febslet.2005.09.043).
- Rabijns A, Verboven C, Rougé P, Barre A, Van Damme EJM, Peumans WJ, De Ranter CJ. 2002.** Structure of an RNase-related protein from *Calystegia sepium*. *Acta Crystallographica Section D* **58**:627–633. doi:[10.1107/S090744490200255X](https://doi.org/10.1107/S090744490200255X).
- Rogers SW, Rogers JC. 1999.** Cloning and characterization of a gibberellin-induced RNase expressed in barley aleurone cells. *Plant Physiology* **119**:1457–1464. doi:[10.1104/pp.119.4.1457](https://doi.org/10.1104/pp.119.4.1457).
- Rojas HJ, Roldán JA, Goldraij A. 2013.** NnSR1, a class III non-S-RNase constitutively expressed in styles, is induced in roots and stems under phosphate deficiency in *Nicotiana glauca*. *Annals of Botany* **112**:1351. doi:[10.1093/aob/mct207](https://doi.org/10.1093/aob/mct207).
- Roldán JA, Quiroga R, Goldraij A. 2010.** Molecular and genetic characterization of novel S-RNases from a natural population of *Nicotiana glauca*. *Plant Cell Reports* **29**:735–746. doi:[10.1007/s00299-010-0860-6](https://doi.org/10.1007/s00299-010-0860-6).

- Tanaka N, Arai J, Inokuchi N, Koyama T, Ohgi K, Irie M, Nakamura KT. 2000.** Crystal structure of a plant ribonuclease, RNase LE. *Journal of Molecular Biology* **298**:859–873. doi:[10.1006/jmbi.2000.3707](https://doi.org/10.1006/jmbi.2000.3707).
- Taylor CB, Bariola PA, DelCardayré SB, Raines RT, Green PJ. 1993.** RNS2: a senescence-associated RNase of *Arabidopsis* that diverged from the S-RNases before speciation. *Proceedings of the National Academy of Sciences* **90**:5118–5122. doi:[10.1073/pnas.90.11.5118](https://doi.org/10.1073/pnas.90.11.5118).
- Van Damme EJM, Hao Q, Barre A, Rougé P, Van Leuven F, Peumans WJ. 2000.** Major protein of resting rhizomes of *Calystegia sepium* (hedge bindweed) closely resembles plant RNases but has no enzymatic activity. *Plant Physiology* **122**:433–446. doi:[10.1104/pp.122.2.433](https://doi.org/10.1104/pp.122.2.433).
- Van Nerum I, Certal AC, Oliveira MM, Keulemans J, Broothaerts W. 2000.** PD1, an S-like RNase gene from a self-incompatible cultivar of almond. *Plant Cell Reports* **19**:1108–1114. doi:[10.1007/s002990000235](https://doi.org/10.1007/s002990000235).
- Wei JY, Li AM, Li Y, Wang J, Liu XB, Liu LS, Xu ZF. 2006.** Cloning and characterization of an RNase-related protein gene preferentially expressed in rice stems. *Bioscience, Biotechnology, and Biochemistry* **70**:1041–1045. doi:[10.1271/bbb.70.1041](https://doi.org/10.1271/bbb.70.1041).
- Ye ZH, Droste DL. 1996.** Isolation and characterization of cDNAs encoding xylogenesis-associated and wounding-induced ribonucleases in *Zinnia elegans*. *Plant Molecular Biology* **30**:697–709. doi:[10.1007/BF00019005](https://doi.org/10.1007/BF00019005).
- Zheng J, Wang Y, He Y, Zhou J, Li Y, Liu Q, Xie X. 2014.** Overexpression of an S-like ribonuclease gene, *OsRNS4*, confers enhanced tolerance to high salinity and hyposensitivity to phytochrome-mediated light signals in rice. *Plant Science* **214**:99–105. doi:[10.1016/j.plantsci.2013.10.003](https://doi.org/10.1016/j.plantsci.2013.10.003).
